# Supplementary material for: Intra-Specific Regulatory Variation in Drosophila pseudoobscura
Source: PubMed Central journal article supplement (PMC3873948; doi:10.1371/journal.pone.0083547), 2013-12-27

**A**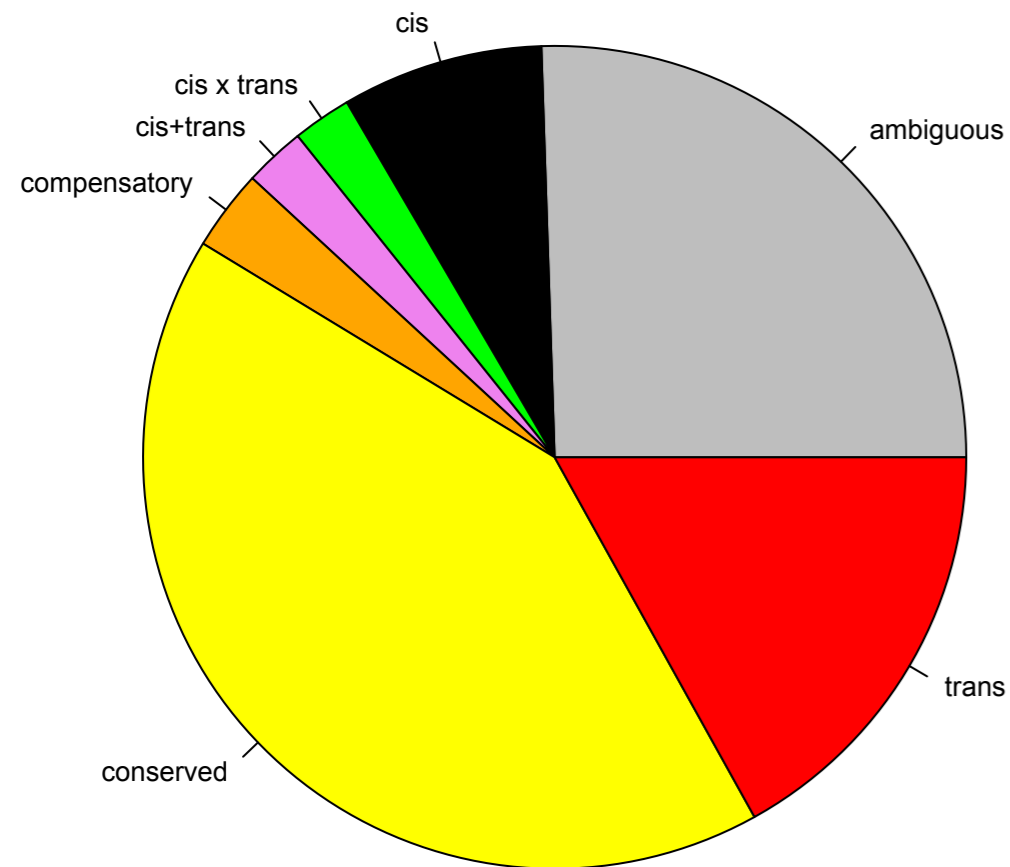**B**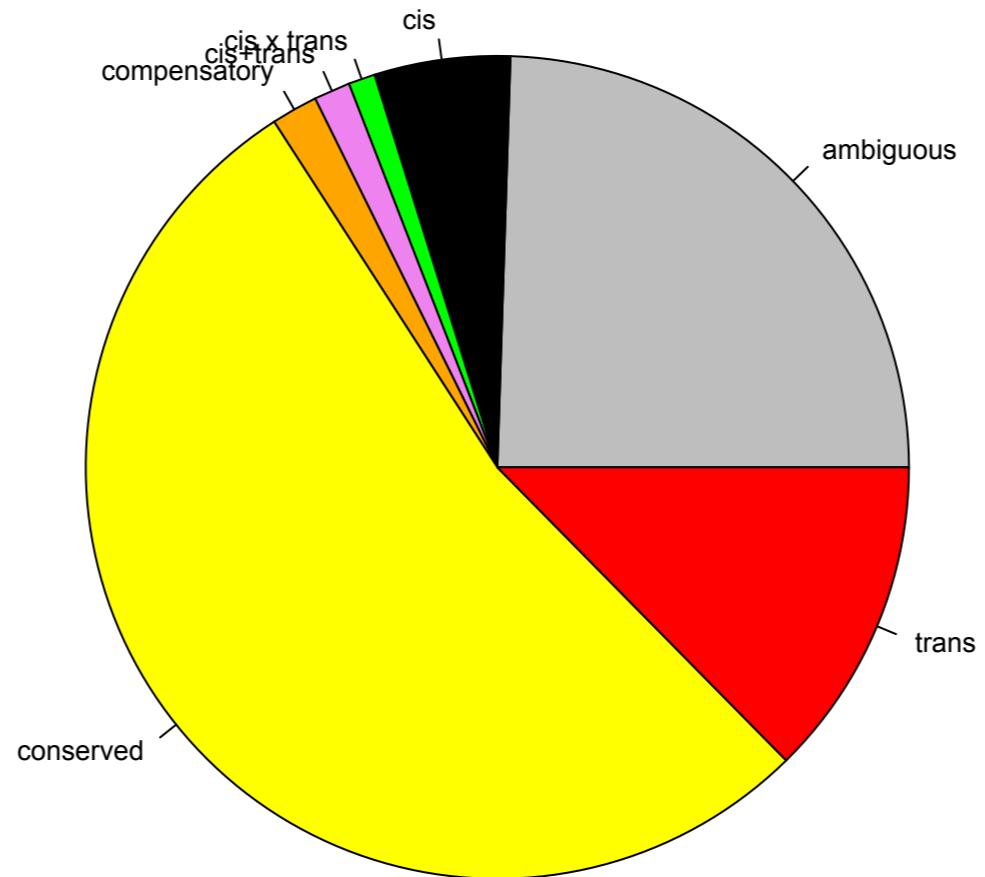**C**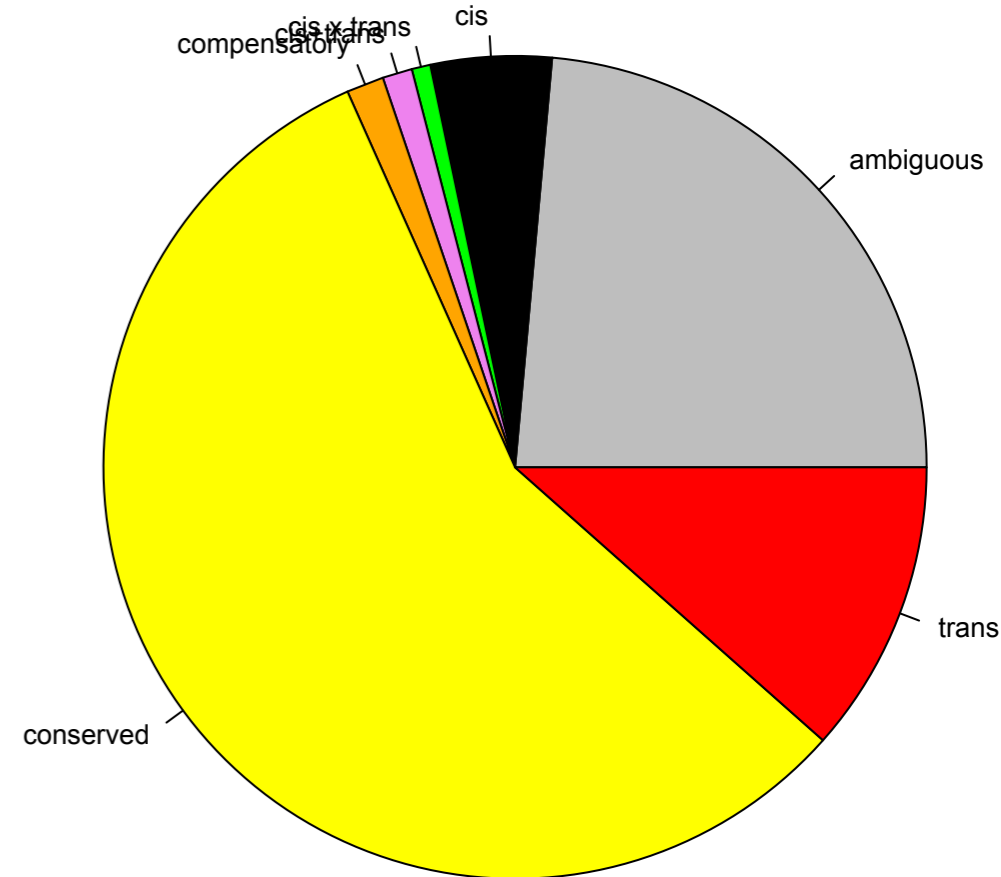

Supplement: pone.0083547.s001.pdf [file pone.0083547.s001.pdf]
