# Supplementary material for: Intra-Specific Regulatory Variation in Drosophila pseudoobscura
Source: PLoS One. 2013 Dec 27;8(12):e83547. doi: 10.1371/journal.pone.0083547 (PMC3873948; doi:10.1371/journal.pone.0083547)
Supplement: Table S4 — Gene summary table. This table provides information about raw and normalized expression counts for parents and hybrids, statistical tests, regulatory types, inheritance modes and cis and trans magnitudes for each gene revealed by RNA-seq. (XLS) [file pone.0083547.s006.xls]

## Sheet: table1
gene_id	ps88f_P	ps94f_P	ps88f_H	ps94f_H	ps88f_P_normalized	ps94f_P_normalized	ps88f_H_normalized	ps94f_H_normalized	q_val_TDE	q_val_cis	q_val_trans	regulatory_category	inheritance_mode	cis_magnitude	trans_magnitude
FBgn0246066	69	96	42	24	68.4641	96.6933	42.0252	24.0144	0.0591836	0.11292	0.0119243	ambiguous	dominant	0.807355	0.309286
FBgn0070530	177	138	45	69	175.625	138.997	45.027	69.0415	0.0610374	0.0998244	0.013952	ambiguous	dominant	0.616671	0.279221
FBgn0073119	858	777	462	540	851.336	782.612	462.278	540.324	0.108281	0.0595349	0.0143505	ambiguous	over-dominant	0.225067	0.103634
FBgn0079893	45	36	8	21	44.6505	36.26	8.00481	21.0126	0.435476	0.068658	0.038908	ambiguous	conserved-expression	1.39232	1.09202
FBgn0076185	1426	1477	769	686	1414.92	1487.67	769.462	686.412	0.351173	0.139473	0.0424036	ambiguous	conserved-expression	0.164775	0.0924485
FBgn0261712	175	136	68	93	173.641	136.982	68.0409	93.0559	0.0591553	0.162618	0.0225049	ambiguous	conserved-expression	0.451696	0.109578
FBgn0070713	44	26	10	22	43.6583	26.1878	10.006	22.0132	0.0614324	0.123433	0.01573	ambiguous	conserved-expression	1.1375	0.400142
FBgn0247098	749	664	221	260	743.183	668.796	221.133	260.156	0.0621981	0.212285	0.0443925	ambiguous	under-dominant	0.234465	0.0823135
FBgn0081141	74	52	16	29	73.4253	52.3756	16.0096	29.0174	0.0954159	0.17001	0.0348464	ambiguous	dominant	0.857981	0.370598
FBgn0075409	87	115	68	48	86.3243	115.831	68.0409	48.0288	0.0776843	0.209199	0.0276885	ambiguous	conserved-expression	0.5025	0.0783231
FBgn0080216	20	10	2	8	19.8447	10.0722	2.0012	8.00481	0.115596	0.169205	0.0383352	ambiguous	conserved-expression	2	1.02163
FBgn0070461	1123	1183	438	379	1114.28	1191.54	438.263	379.228	0.233975	0.162654	0.0385759	ambiguous	under-dominant	0.208733	0.11201
FBgn0071767	462	508	307	249	458.412	511.669	307.184	249.15	0.178391	0.0775684	0.0141277	ambiguous	dominant	0.302093	0.143527
FBgn0076382	791	718	314	365	784.857	723.186	314.189	365.219	0.135515	0.158989	0.0467916	ambiguous	dominant	0.217132	0.0990688
FBgn0079640	472	427	174	221	468.334	430.084	174.105	221.133	0.24331	0.0773653	0.031883	ambiguous	dominant	0.344959	0.222039
FBgn0248796	10	20	12	4	9.92233	20.1444	12.0072	4.0024	0.107953	0.153221	0.0262799	ambiguous	conserved-expression	1.58496	0.563332
FBgn0247171	240	282	88	66	238.136	284.037	88.0529	66.0397	0.0964089	0.236338	0.0459819	ambiguous	under-dominant	0.415037	0.160746
FBgn0072348	10270	10437	3663	3479	10190.2	10512.4	3665.2	3481.09	0.15335	0.165116	0.0135228	ambiguous	under-dominant	0.074353	0.0294514
FBgn0074379	152	120	62	84	150.819	120.867	62.0373	84.0505	0.103305	0.204928	0.0433183	ambiguous	conserved-expression	0.438121	0.118715
FBgn0075673	45	29	21	35	44.6505	29.2094	21.0126	35.021	0.112873	0.19051	0.0381204	ambiguous	dominant	0.736966	0.124724
FBgn0247114	17	8	2	8	16.868	8.05778	2.0012	8.00481	0.120412	0.169205	0.0373156	ambiguous	conserved-expression	2	0.934168
FBgn0074878	249	290	82	58	247.066	292.094	82.0493	58.0348	0.110478	0.161384	0.0309875	ambiguous	under-dominant	0.499571	0.258033
FBgn0245812	852	798	410	486	845.383	803.763	410.246	486.292	0.329137	0.0509677	0.0338507	ambiguous	conserved-expression	0.245332	0.172498
FBgn0249287	269	291	159	118	266.911	293.102	159.096	118.071	0.412333	0.0744843	0.0336851	ambiguous	conserved-expression	0.43024	0.295196
FBgn0077519	53	39	14	30	52.5884	39.2817	14.0084	30.018	0.231134	0.070907	0.0236416	ambiguous	conserved-expression	1.09954	0.678648
FBgn0080482	662	696	448	376	656.858	701.027	448.269	376.226	0.392303	0.0721111	0.0291991	ambiguous	over-dominant	0.252766	0.158879
FBgn0247520	10	18	8	1	9.92233	18.13	8.00481	1.0006	0.193252	0.0664459	0.0169271	ambiguous	conserved-expression	3	2.13037
FBgn0076291	72	92	34	16	71.4408	92.6644	34.0204	16.0096	0.172066	0.0567338	0.0120856	ambiguous	dominant	1.08746	0.712195
FBgn0073765	500	568	390	353	496.117	572.102	390.234	353.212	0.0535337	0.419861	0.0447536	ambiguous	over-dominant	0.143806	0.0617876
FBgn0080375	15	27	18	9	14.8835	27.195	18.0108	9.00541	0.102793	0.240078	0.0422125	ambiguous	conserved-expression	1	0.130372
FBgn0076921	174	196	134	96	172.649	197.416	134.081	96.0577	0.317288	0.0672679	0.0255769	ambiguous	dominant	0.481127	0.28773
FBgn0080351	524	462	218	270	519.93	465.337	218.131	270.162	0.107597	0.0780136	0.0169316	ambiguous	conserved-expression	0.308631	0.148588
FBgn0071295	219	255	178	134	217.299	256.842	178.107	134.081	0.1381	0.0706772	0.0112354	ambiguous	over-dominant	0.409644	0.168447
FBgn0078095	523	462	202	246	518.938	465.337	202.121	246.148	0.113849	0.130511	0.0317352	ambiguous	conserved-expression	0.284303	0.127016
FBgn0079607	45	29	21	35	44.6505	29.2094	21.0126	35.021	0.112873	0.19051	0.0381204	ambiguous	dominant	0.736966	0.124724
FBgn0248377	192	163	84	115	190.509	164.177	84.0505	115.069	0.21591	0.108702	0.0382806	ambiguous	conserved-expression	0.453173	0.238569
FBgn0073249	535	571	305	253	530.845	575.124	305.183	253.152	0.321961	0.125376	0.0413652	ambiguous	conserved-expression	0.269672	0.154089
FBgn0080881	435	473	297	244	431.622	476.416	297.178	244.147	0.25258	0.109344	0.0293902	ambiguous	dominant	0.283582	0.141126
FBgn0076251	17	12	0	8	16.868	12.0867	1	8.00481	0.466263	0.0648654	0.0394246	ambiguous	conserved-expression	3.00087	2.52
FBgn0246313	121	98	38	62	120.06	98.7078	38.0228	62.0373	0.205579	0.0740744	0.0231763	ambiguous	conserved-expression	0.706269	0.423746
FBgn0071117	1278	1205	530	612	1268.07	1213.7	530.318	612.368	0.284827	0.0640549	0.0365448	ambiguous	dominant	0.207539	0.144315
FBgn0074090	199	221	108	77	197.454	222.596	108.065	77.0463	0.347247	0.104294	0.03988	ambiguous	conserved-expression	0.488101	0.315192
FBgn0070986	430	493	273	235	426.66	496.561	273.164	235.141	0.055352	0.275664	0.0285465	ambiguous	dominant	0.21624	0.00264152
FBgn0079114	132	103	47	67	130.975	103.744	47.0282	67.0403	0.112307	0.189691	0.042191	ambiguous	conserved-expression	0.5115	0.175237
FBgn0078967	204	239	147	106	202.416	240.726	147.088	106.064	0.136367	0.0579321	0.00904717	ambiguous	dominant	0.471752	0.22168
FBgn0078863	212	185	85	117	210.353	186.336	85.0511	117.07	0.286164	0.0984563	0.0441579	ambiguous	conserved-expression	0.460974	0.286066
FBgn0073268	94	68	34	50	93.2699	68.4911	34.0204	50.03	0.0812618	0.229685	0.0417858	ambiguous	conserved-expression	0.556393	0.110898
FBgn0261038	39	53	32	17	38.6971	53.3828	32.0192	17.0102	0.208109	0.126446	0.0342616	ambiguous	conserved-expression	0.912537	0.448388
FBgn0077390	541	606	257	213	536.798	610.377	257.154	213.128	0.0750224	0.166293	0.0191601	ambiguous	dominant	0.270915	0.085595
FBgn0075011	52	44	6	18	51.5961	44.3178	6.0036	18.0108	0.53748	0.062186	0.0401785	ambiguous	under-dominant	1.58496	1.36559
FBgn0244939	22	11	8	16	21.8291	11.0794	8.00481	16.0096	0.0976728	0.266854	0.0499784	ambiguous	conserved-expression	1	0.0216307
FBgn0247649	137	108	27	43	135.936	108.78	27.0162	43.0258	0.121291	0.178424	0.0465444	ambiguous	under-dominant	0.671377	0.349863
FBgn0075025	337	388	244	211	334.383	390.802	244.147	211.127	0.0832939	0.328528	0.0465438	ambiguous	dominant	0.209638	0.0153006
FBgn0077516	768	848	457	386	762.035	854.124	457.275	386.232	0.0615496	0.0814759	0.00546495	ambiguous	conserved-expression	0.243593	0.0790046
FBgn0079630	490	448	200	251	486.194	451.236	200.12	251.151	0.296044	0.0713825	0.0361492	ambiguous	conserved-expression	0.327687	0.220035
FBgn0080229	177	217	139	114	175.625	218.567	139.084	114.068	0.0678896	0.314001	0.0399749	ambiguous	dominant	0.286051	0.0295253
FBgn0081146	74	52	16	29	73.4253	52.3756	16.0096	29.0174	0.0954159	0.17001	0.0348464	ambiguous	dominant	0.857981	0.370598
FBgn0249696	27	45	25	13	26.7903	45.325	25.015	13.0078	0.0578256	0.17479	0.0194331	ambiguous	conserved-expression	0.943416	0.18482
FBgn0077318	728	805	436	368	722.346	810.814	436.262	368.221	0.0651855	0.0892484	0.00651399	ambiguous	conserved-expression	0.244622	0.0779413
FBgn0074483	40	28	10	24	39.6893	28.2022	10.006	24.0144	0.230606	0.0715959	0.023666	ambiguous	conserved-expression	1.26303	0.770092
FBgn0245897	15	29	10	3	14.8835	29.2094	10.006	3.0018	0.0592066	0.165722	0.0245599	ambiguous	dominant	1.73697	0.764244
FBgn0071064	11	20	16	7	10.9146	20.1444	16.0096	7.00421	0.160842	0.192043	0.0450409	ambiguous	conserved-expression	1.19265	0.308518
FBgn0072583	398	442	181	138	394.909	445.192	181.109	138.083	0.168631	0.0831317	0.0155016	ambiguous	under-dominant	0.391321	0.218413
FBgn0080074	217	178	92	124	215.315	179.286	92.0553	124.075	0.101604	0.112709	0.0217338	ambiguous	conserved-expression	0.430634	0.166447
FBgn0078882	786	853	477	411	779.895	859.161	477.287	411.247	0.121316	0.1254	0.0162345	ambiguous	dominant	0.214851	0.0752037
FBgn0077989	68	90	42	22	67.4719	90.65	42.0252	22.0132	0.121751	0.0640016	0.0101851	ambiguous	conserved-expression	0.932886	0.506865
FBgn0249616	856	944	485	428	849.352	950.818	485.291	428.257	0.050253	0.213981	0.0171128	ambiguous	conserved-expression	0.180374	0.0175672
FBgn0077835	175	149	49	77	173.641	150.076	49.0294	77.0463	0.248083	0.0604107	0.0225049	ambiguous	dominant	0.652077	0.441665
FBgn0076944	1966	2053	1055	973	1950.73	2067.83	1055.63	973.585	0.175083	0.245916	0.0426483	ambiguous	conserved-expression	0.116731	0.0326303
FBgn0247786	209	194	62	94	207.377	195.401	62.0373	94.0565	0.5999	0.0517649	0.0481123	ambiguous	dominant	0.600393	0.514577
FBgn0245643	171	204	77	56	169.672	205.473	77.0463	56.0336	0.127549	0.221049	0.0465444	ambiguous	dominant	0.459432	0.183228
FBgn0245890	366	308	118	151	363.157	310.224	118.071	151.091	0.0602712	0.15051	0.0240377	ambiguous	dominant	0.355762	0.128479
FBgn0072120	222	182	83	109	220.276	183.314	83.0499	109.065	0.0963896	0.187182	0.038908	ambiguous	conserved-expression	0.393145	0.128154
FBgn0070720	239	191	79	112	237.144	192.984	79.0475	112.419	0.0516044	0.0719592	0.00820569	ambiguous	conserved-expression	0.5081	0.210819
FBgn0070557	1618	1717	644	563	1605.43	1729.4	644.387	563.338	0.0964404	0.104153	0.0105077	ambiguous	under-dominant	0.193926	0.0866166
FBgn0075397	49	69	31	17	48.6194	69.4983	31.0186	17.0102	0.103349	0.157707	0.0269022	ambiguous	conserved-expression	0.866733	0.351288
FBgn0245793	44	56	26	11	43.6583	56.4044	26.0156	11.0066	0.306662	0.0657814	0.0235827	ambiguous	conserved-expression	1.24101	0.871454
FBgn0070468	20	9	2	8	19.8447	9.065	2.0012	8.00481	0.0734255	0.169205	0.0288918	ambiguous	conserved-expression	2	0.869628
FBgn0074996	54	42	9	21	53.5806	42.3033	9.00541	21.0126	0.326147	0.10867	0.0476887	ambiguous	dominant	1.22239	0.881453
FBgn0075291	174	148	58	86	172.649	149.069	58.0348	86.0517	0.246431	0.0839326	0.0319756	ambiguous	conserved-expression	0.568284	0.356424
FBgn0249433	24	14	4	15	23.8136	14.1011	4.0024	15.009	0.17172	0.0502839	0.0122555	ambiguous	conserved-expression	1.90689	1.15091
FBgn0247040	1139	1085	379	451	1130.15	1092.84	379.228	451.271	0.431156	0.0559092	0.0433183	ambiguous	under-dominant	0.25093	0.202488
FBgn0082145	1180	1276	606	547	1170.84	1285.22	606.364	547.329	0.0641759	0.265789	0.0276885	ambiguous	dominant	0.147777	0.0133048
FBgn0076123	254	272	148	107	252.027	273.964	148.089	107.064	0.491074	0.0592223	0.0334482	ambiguous	conserved-expression	0.467986	0.347577
FBgn0070715	262	304	109	80	259.965	306.196	109.065	80.0481	0.110155	0.141911	0.0235346	ambiguous	under-dominant	0.446256	0.210121
FBgn0073864	23	12	1	7	22.8214	12.0867	1.0006	7.00421	0.109315	0.104153	0.0228975	ambiguous	dominant	2.80735	1.89039
FBgn0262048	465	519	183	143	461.389	522.748	183.11	143.086	0.113743	0.120001	0.0182974	ambiguous	under-dominant	0.355829	0.175694
FBgn0244488	167	129	40	57	165.703	129.932	40.024	57.0342	0.0592757	0.234877	0.0441579	ambiguous	dominant	0.510962	0.160116
FBgn0073527	316	347	159	124	313.546	349.506	159.096	124.075	0.281678	0.151709	0.0472188	ambiguous	dominant	0.358687	0.202045
FBgn0249137	9849	9510	4947	4617	9772.51	9578.68	4949.97	4619.77	0.0918666	0.0130061	0.14109	ambiguous	conserved-expression	0.0995982	0.070697
XLOC_002336	23	12	19	5	22.8214	12.0867	19.0114	5.003	0.109315	0.0232655	0.434595	ambiguous	conserved-expression	1.926	1.00903
FBgn0243551	15	9	14	0	14.8835	8.24623	14.0084	1	0.237871	0.00296468	0.093802	ambiguous	conserved-expression	3.80822	2.95631
FBgn0070943	57	78	11	27	56.5573	78.5633	11.0066	27.0162	0.109936	0.046244	0.301913	ambiguous	dominant	1.29546	0.821313
FBgn0245007	84	72	78	45	83.3476	72.52	78.0469	45.027	0.464653	0.0216417	0.224818	ambiguous	over-dominant	0.793549	0.592787
FBgn0244879	25	26	5	17	24.8058	26.1878	5.003	17.0102	0.904663	0.0474934	0.105684	ambiguous	conserved-expression	1.76553	1.68732
FBgn0079413	72	96	39	70	71.4408	96.6933	39.0234	70.0421	0.100369	0.0193336	0.456245	ambiguous	dominant	0.843881	0.407213
FBgn0245674	10	20	0	17	9.92233	20.1444	1	17.0102	0.107953	0.000498903	0.0671193	ambiguous	conserved-expression	4.08833	3.0667
FBgn0070556	168	140	101	65	166.695	141.011	101.061	65.0391	0.195274	0.0350042	0.325883	ambiguous	conserved-expression	0.635844	0.39444
FBgn0070360	320	373	194	281	317.515	375.694	194.117	281.169	0.0650654	0.000738683	0.222886	ambiguous	over-dominant	0.534513	0.291779
FBgn0079727	1038	1040	598	506	1029.94	1047.51	598.359	506.304	0.882583	0.0416069	0.0520955	ambiguous	conserved-expression	0.241008	0.2166
FBgn0248501	158	128	103	64	156.773	128.924	103.062	64.0385	0.142308	0.0197698	0.320309	ambiguous	conserved-expression	0.686501	0.404351
FBgn0073367	179	147	97	55	177.61	148.062	97.0583	55.033	0.143655	0.00641171	0.150199	ambiguous	conserved-expression	0.818553	0.55604
FBgn0246831	68	63	29	54	67.4719	63.455	29.0174	54.0324	0.770764	0.0342526	0.0619368	ambiguous	conserved-expression	0.896907	0.808354
FBgn0074748	32	22	18	4	31.7515	22.1589	18.0108	4.0024	0.264225	0.0155796	0.13663	ambiguous	conserved-expression	2.16993	1.65099
FBgn0248181	9813	9910	4317	4627	9736.79	9981.57	4319.59	4629.78	0.326151	0.00498334	0.200739	ambiguous	under-dominant	0.100048	0.0642265
FBgn0070110	30	39	4	16	29.767	39.2817	4.0024	16.0096	0.362759	0.0342166	0.144644	ambiguous	dominant	2	1.59986
FBgn0250211	367	355	190	141	364.15	357.564	190.114	141.085	0.796792	0.0452179	0.109744	ambiguous	conserved-expression	0.430304	0.403974
FBgn0077730	313	318	134	183	310.569	320.297	134.081	183.11	0.834764	0.033449	0.124473	ambiguous	conserved-expression	0.449611	0.405116
FBgn0073559	57	36	37	15	56.5573	36.26	37.0222	15.009	0.0589686	0.0160346	0.394726	ambiguous	conserved-expression	1.30256	0.661228
FBgn0076442	579	519	354	270	574.503	522.748	354.213	270.162	0.147888	0.00835237	0.199108	ambiguous	dominant	0.39079	0.254592
FBgn0080740	185	224	83	130	183.563	225.618	83.0499	130.078	0.0814066	0.009607	0.321813	ambiguous	conserved-expression	0.647328	0.349724
FBgn0077243	1128	1069	504	413	1119.24	1076.72	504.303	413.248	0.373643	0.0232655	0.123271	ambiguous	under-dominant	0.287282	0.231407
FBgn0077842	72	98	36	72	71.4408	98.7078	36.0216	72.0433	0.0744706	0.00455503	0.307229	ambiguous	dominant	1	0.533584
FBgn0246395	155	157	105	70	153.796	158.134	105.063	70.0421	0.900261	0.0490056	0.0777572	ambiguous	conserved-expression	0.584963	0.544835
FBgn0077352	62	50	36	14	61.5185	50.3611	36.0216	14.0084	0.371249	0.0134356	0.114948	ambiguous	conserved-expression	1.36257	1.07386
FBgn0072037	27	17	25	5	26.7903	17.1228	25.015	5.003	0.209832	0.00180875	0.107346	ambiguous	conserved-expression	2.32193	1.67613
FBgn0250236	124	146	43	77	123.037	147.054	43.0258	77.0463	0.241957	0.0134514	0.183891	ambiguous	conserved-expression	0.840522	0.583263
FBgn0074210	231	205	106	66	229.206	206.481	106.064	66.0397	0.335881	0.0181592	0.125807	ambiguous	dominant	0.683526	0.532888
FBgn0248854	95	96	25	49	94.2622	96.6933	25.015	49.0294	0.930237	0.0306537	0.0737054	ambiguous	conserved-expression	0.970854	0.934116
FBgn0249702	74	76	26	49	73.4253	76.5489	26.0156	49.0294	0.882237	0.0416754	0.120491	ambiguous	conserved-expression	0.91427	0.854165
FBgn0081377	69	53	31	11	68.4641	53.3828	31.0186	11.0066	0.236915	0.0139407	0.118765	ambiguous	dominant	1.49476	1.13579
FBgn0080535	74	77	31	58	73.4253	86.5543	31.0186	64.7682	0.425099	0.00476039	0.114747	ambiguous	conserved-expression	1.06215	0.824821
FBgn0074135	829	815	352	434	822.561	820.886	352.211	434.261	0.884701	0.0205703	0.05619	ambiguous	conserved-expression	0.30212	0.299178
FBgn0080008	110	97	54	25	109.146	97.7006	54.0324	25.015	0.498924	0.00914526	0.0597145	ambiguous	conserved-expression	1.11103	0.951215
FBgn0081600	337	298	96	60	334.383	300.152	96.0577	60.036	0.220993	0.0281999	0.13157	ambiguous	under-dominant	0.678072	0.522266
FBgn0075821	66	51	46	22	65.4874	51.3683	46.0276	22.0132	0.259662	0.0242281	0.263115	ambiguous	conserved-expression	1.06413	0.713792
FBgn0077687	492	452	248	190	488.179	455.264	248.149	190.114	0.325722	0.038826	0.218685	ambiguous	conserved-expression	0.384341	0.283636
FBgn0080424	4536	4586	2042	2238	4500.77	4619.12	2043.23	2239.34	0.492689	0.0136787	0.192845	ambiguous	under-dominant	0.132227	0.0947807
FBgn0081236	706	688	322	392	700.517	692.969	322.193	392.236	0.797855	0.0427645	0.0818533	ambiguous	conserved-expression	0.283793	0.268164
FBgn0071172	198	230	82	119	196.462	231.661	82.0493	119.071	0.168799	0.0464012	0.415736	ambiguous	conserved-expression	0.537266	0.299502
FBgn0074649	62	57	28	52	61.5185	57.4117	28.0168	52.0312	0.756691	0.0393314	0.0691027	ambiguous	conserved-expression	0.893085	0.793409
FBgn0072512	185	190	113	76	183.563	191.372	113.068	76.0457	0.810905	0.0439101	0.0556761	ambiguous	conserved-expression	0.572251	0.512147
FBgn0081965	28	14	28	8	27.7825	14.1011	28.0168	8.00481	0.0582042	0.00615451	0.452332	ambiguous	dominant	1.80735	0.828986
FBgn0078843	17	18	2	13	16.868	18.13	2.0012	13.0078	0.891317	0.0194119	0.053624	ambiguous	conserved-expression	2.70044	2.59635
FBgn0078272	342	310	214	148	339.344	312.239	214.129	148.089	0.339639	0.00584247	0.097256	ambiguous	conserved-expression	0.532014	0.411916
FBgn0082147	300	350	159	228	297.67	352.528	159.096	228.137	0.0730949	0.00407709	0.296588	ambiguous	dominant	0.520007	0.275984
FBgn0078461	43	63	23	54	42.666	63.455	23.0138	54.0324	0.0843489	0.0035664	0.308869	ambiguous	dominant	1.23133	0.65868
FBgn0250356	1469	1535	700	860	1457.59	1546.09	700.421	860.517	0.24158	0.000532133	0.0677766	ambiguous	conserved-expression	0.296982	0.211947
FBgn0079870	519	456	288	195	514.969	459.293	288.173	195.117	0.0989453	0.00043316	0.0538682	ambiguous	conserved-expression	0.562595	0.397525
FBgn0079107	1353	1282	620	519	1342.49	1291.26	620.373	519.312	0.321961	0.0244051	0.142498	ambiguous	under-dominant	0.256534	0.200399
FBgn0074957	18	9	3	6	17.8602	20.1223	3.0018	13.3267	0.800956	0.0446513	0.22386	ambiguous	conserved-expression	2.15042	1.97837
FBgn0244507	130	146	49	92	128.99	147.054	49.0294	92.0553	0.408146	0.00279435	0.0671193	ambiguous	conserved-expression	0.908852	0.719765
FBgn0079906	422	414	289	226	418.722	416.99	289.174	226.136	0.901202	0.038826	0.0990378	ambiguous	over-dominant	0.354747	0.348765
FBgn0077553	483	503	180	242	479.249	506.633	180.108	242.145	0.556527	0.0166224	0.11881	ambiguous	dominant	0.42701	0.346844
FBgn0070998	174	198	72	116	172.649	199.43	72.0433	116.07	0.27428	0.00994242	0.174957	ambiguous	conserved-expression	0.688056	0.480012
FBgn0078796	122	96	52	28	121.052	96.6933	52.0312	28.0168	0.143474	0.0426741	0.299696	ambiguous	dominant	0.893085	0.568941
FBgn0080991	217	209	112	72	215.315	213.593	112.067	73.0985	0.904873	0.0301344	0.0671193	ambiguous	conserved-expression	0.616452	0.604869
FBgn0072565	964	936	466	551	956.513	942.76	466.28	551.331	0.715251	0.0381678	0.0688436	ambiguous	conserved-expression	0.241722	0.220828
XLOC_000717	224	189	131	88	222.26	190.365	131.079	88.0529	0.159719	0.02704	0.311501	ambiguous	conserved-expression	0.573991	0.35051
FBgn0247439	36	45	13	31	35.7204	45.325	13.0078	31.0186	0.402905	0.0356342	0.248319	ambiguous	conserved-expression	1.25376	0.910198
FBgn0070699	151	174	46	86	149.827	175.257	46.0276	86.0517	0.263747	0.00438774	0.0875768	ambiguous	dominant	0.902703	0.676533
FBgn0077388	630	570	274	215	625.107	574.117	274.165	215.129	0.172038	0.0493648	0.302539	ambiguous	under-dominant	0.349839	0.22708
FBgn0081086	1233	1120	604	498	1223.42	1128.09	604.363	498.299	0.0583624	0.0144266	0.277405	ambiguous	dominant	0.278403	0.161359
FBgn0079223	632	662	372	458	627.091	666.781	372.224	458.275	0.439061	0.0173865	0.235162	ambiguous	over-dominant	0.300045	0.211508
FBgn0079685	221	264	117	170	219.284	265.907	117.07	170.102	0.0763463	0.0125704	0.415753	ambiguous	dominant	0.539026	0.260904
FBgn0077654	50	45	35	15	49.6117	45.325	35.021	15.009	0.721192	0.0293622	0.113117	ambiguous	conserved-expression	1.22239	1.09202
FBgn0080860	3967	3901	1547	1705	3936.19	3929.17	1547.93	1706.02	0.752205	0.0258199	0.0640833	ambiguous	under-dominant	0.140299	0.137725
FBgn0243686	306	335	105	160	303.623	335.916	105.063	159.383	0.332651	0.0067186	0.102108	ambiguous	dominant	0.601242	0.455422
FBgn0080270	256	218	165	99	254.012	219.574	165.099	99.0595	0.154877	0.000748131	0.0690212	ambiguous	conserved-expression	0.736966	0.526781
FBgn0072503	44	47	7	23	43.6583	47.3394	7.00421	23.0138	0.798269	0.0194119	0.0560263	ambiguous	conserved-expression	1.71621	1.59942
FBgn0073694	115	89	81	43	114.107	89.6428	81.0487	43.0258	0.127875	0.00617919	0.224649	ambiguous	dominant	0.913585	0.565459
FBgn0245811	18	25	3	14	17.8602	25.1806	3.0018	14.0084	0.3734	0.0342166	0.180121	ambiguous	conserved-expression	2.22239	1.72683
FBgn0248746	131	108	50	24	129.983	108.78	50.03	24.0144	0.229266	0.0181504	0.126845	ambiguous	under-dominant	1.05889	0.801989
FBgn0245616	16	19	4	20	15.8757	19.1372	4.0024	20.012	0.68882	0.00606922	0.0668646	ambiguous	conserved-expression	2.32193	2.05237
FBgn0081764	196	221	57	89	194.478	222.596	57.0342	89.0535	0.281056	0.0425292	0.252379	ambiguous	under-dominant	0.642843	0.44802
FBgn0080635	47	59	10	31	46.635	59.4261	10.006	31.0186	0.321137	0.00701637	0.0844908	ambiguous	conserved-expression	1.63227	1.28258
FBgn0244950	18	20	1	9	17.8602	20.1444	1.0006	9.00541	0.799139	0.0395671	0.0747411	ambiguous	conserved-expression	3.16993	2.99629
FBgn0249895	856	826	387	307	849.352	831.966	387.233	307.184	0.652432	0.0210038	0.0701092	ambiguous	under-dominant	0.334095	0.304257
FBgn0078088	25	42	17	43	24.8058	42.3033	17.0102	43.0258	0.0637868	0.00595533	0.495988	ambiguous	dominant	1.3388	0.56871
FBgn0077272	3436	3581	1837	2056	3409.31	3606.86	1838.1	2057.24	0.0766863	0.00303116	0.323687	ambiguous	over-dominant	0.162489	0.0812254
FBgn0075041	313	290	178	123	310.569	292.094	178.107	123.074	0.500287	0.0137711	0.095994	ambiguous	conserved-expression	0.533219	0.44474
FBgn0022538	2642	2664	1218	1356	2621.48	2683.24	1218.73	1356.81	0.668277	0.0306537	0.199991	ambiguous	conserved-expression	0.154843	0.121249
XLOC_014487	21	29	9	27	20.8369	29.2094	9.00541	27.0162	0.341188	0.0161048	0.245153	ambiguous	conserved-expression	1.58496	1.09767
FBgn0079008	57	54	16	36	56.5573	54.39	16.0096	36.0216	0.859793	0.0312681	0.0546103	ambiguous	conserved-expression	1.16993	1.11355
FBgn0248180	105	137	29	58	104.185	137.989	29.0174	58.0348	0.0640073	0.0130816	0.252814	ambiguous	dominant	1	0.594583
FBgn0072560	195	212	87	136	193.486	213.531	87.0523	136.082	0.465618	0.00798632	0.116924	ambiguous	conserved-expression	0.644519	0.502298
FBgn0073687	328	334	180	234	325.453	336.412	180.108	234.141	0.812269	0.0410381	0.177592	ambiguous	over-dominant	0.378512	0.330729
FBgn0073917	21	21	9	0	20.8369	21.1517	9.00541	1	0.988999	0.0406632	0.0514665	ambiguous	conserved-expression	3.17079	3.14916
FBgn0075582	1825	1931	798	955	1810.83	1944.95	798.479	955.574	0.0910366	0.00156321	0.164728	ambiguous	dominant	0.259112	0.15603
FBgn0074821	322	338	122	167	319.499	340.441	122.073	167.1	0.577848	0.0421771	0.19501	ambiguous	conserved-expression	0.452967	0.361374
FBgn0070826	8	14	2	12	7.93787	14.1011	2.0012	12.0072	0.278459	0.031427	0.299696	ambiguous	conserved-expression	2.58496	1.75598
FBgn0245518	81	53	56	59	80.3709	81.624	56.0336	90.2671	0.976706	0.0281207	0.184879	ambiguous	over-dominant	0.687907	0.665587
FBgn0081213	374	376	222	288	371.095	378.716	222.133	288.173	0.902428	0.0212632	0.113071	ambiguous	over-dominant	0.375509	0.346184
FBgn0075450	972	979	563	672	964.451	986.071	563.338	672.404	0.817687	0.0123537	0.104459	ambiguous	over-dominant	0.255326	0.223343
FBgn0079596	46	32	40	12	45.6427	32.2311	40.024	12.0072	0.18751	0.000991477	0.0919222	ambiguous	conserved-expression	1.73697	1.23503
FBgn0071062	116	122	33	59	115.099	122.881	33.0198	59.0354	0.743558	0.0371322	0.118102	ambiguous	conserved-expression	0.838249	0.743862
FBgn0080574	165	188	85	133	163.719	189.358	85.0511	133.08	0.283559	0.00874732	0.20575	ambiguous	dominant	0.645891	0.435994
FBgn0077047	19	25	5	18	18.8524	25.1806	5.003	18.0108	0.457766	0.0328884	0.199865	ambiguous	conserved-expression	1.848	1.43044
FBgn0074784	59	57	29	12	58.5418	57.4117	29.0174	12.0072	0.914968	0.0427645	0.0776274	ambiguous	conserved-expression	1.27302	1.2449
FBgn0247886	409	391	281	209	405.823	393.824	281.169	209.126	0.684495	0.0113331	0.073607	ambiguous	over-dominant	0.427067	0.383766
XLOC_011364	34	39	8	23	33.7359	39.2817	8.00481	23.0138	0.635459	0.0359397	0.136248	ambiguous	conserved-expression	1.52356	1.30399
XLOC_001913	67	88	24	51	66.4796	88.6356	24.0144	51.0306	0.137676	0.0126592	0.252589	ambiguous	conserved-expression	1.08746	0.67249
FBgn0078388	851	903	259	342	844.391	909.522	259.156	342.205	0.244796	0.00570983	0.100611	ambiguous	under-dominant	0.401044	0.293847
FBgn0081314	96	71	63	31	95.2544	71.5128	63.0379	31.0186	0.101709	0.00835237	0.256886	ambiguous	conserved-expression	1.02308	0.609499
FBgn0079488	1488	1361	861	684	1476.44	1370.83	861.517	684.411	0.0544034	0.000178966	0.0529583	ambiguous	dominant	0.332017	0.22494
FBgn0079792	575	635	253	314	570.534	639.586	253.152	314.189	0.110507	0.0499323	0.516209	ambiguous	conserved-expression	0.311627	0.146802
FBgn0079073	24	34	4	16	23.8136	34.2456	4.0024	16.0096	0.262748	0.0342166	0.200118	ambiguous	conserved-expression	2	1.47587
FBgn0080202	106	94	55	29	105.177	94.6789	55.033	29.0174	0.528759	0.0303053	0.129264	ambiguous	conserved-expression	0.923379	0.771678
FBgn0249940	3904	3937	1315	1452	3873.68	3965.43	1315.79	1452.87	0.592581	0.0394227	0.212409	ambiguous	under-dominant	0.142979	0.109204
FBgn0247739	2295	2304	990	1140	2277.18	2320.64	990.595	1140.68	0.783584	0.00742716	0.0704185	ambiguous	dominant	0.203533	0.176256
FBgn0079424	243	235	118	165	241.113	236.697	118.071	165.099	0.834836	0.0304369	0.0680629	ambiguous	conserved-expression	0.483679	0.457014
FBgn0070830	32	47	16	39	31.7515	47.3394	16.0096	39.0234	0.140044	0.0128639	0.358402	ambiguous	dominant	1.2854	0.709183
FBgn0070884	51	60	11	33	50.6039	60.4333	11.0066	33.0198	0.476605	0.00632643	0.0595475	ambiguous	conserved-expression	1.58496	1.32887
FBgn0245328	121	90	54	25	120.06	90.65	54.0324	25.015	0.0679393	0.00914526	0.191073	ambiguous	dominant	1.11103	0.705652
FBgn0079505	247	252	68	104	245.082	253.82	68.0409	104.062	0.825525	0.0343773	0.0932993	ambiguous	under-dominant	0.612977	0.562433
FBgn0246359	84	112	37	86	83.3476	104.736	37.0222	79.8932	0.204183	0.000789251	0.0801321	ambiguous	dominant	1.10968	0.780143
FBgn0245040	230	230	128	86	228.214	231.661	128.077	86.0517	0.959311	0.0297908	0.0512545	ambiguous	conserved-expression	0.573735	0.552105
FBgn0244101	105	97	70	41	104.185	97.7006	70.0421	41.0246	0.698987	0.0376066	0.141074	ambiguous	conserved-expression	0.771731	0.679029
FBgn0248787	96	69	59	30	95.2544	69.4983	59.0354	30.018	0.0717252	0.0161074	0.356096	ambiguous	conserved-expression	0.975752	0.520945
FBgn0247810	808	762	547	442	801.725	767.503	547.329	442.266	0.408927	0.00941603	0.113104	ambiguous	over-dominant	0.307494	0.244561
FBgn0079940	1256	1177	723	613	1246.25	1185.5	723.434	613.368	0.231724	0.0237772	0.220863	ambiguous	dominant	0.238109	0.166017
FBgn0081394	880	942	470	604	873.165	948.803	470.282	604.363	0.173279	0.000484949	0.0952394	ambiguous	over-dominant	0.361888	0.242034
FBgn0080942	11	12	1	9	10.9146	12.0867	1.0006	9.00541	0.872416	0.0395671	0.0903547	ambiguous	conserved-expression	3.16993	3.02276
FBgn0077704	1735	1614	840	684	1721.52	1625.66	840.505	684.411	0.103023	0.00122247	0.0618714	ambiguous	dominant	0.296393	0.213729
FBgn0070928	17	19	4	18	16.868	19.1372	4.0024	18.0108	0.794683	0.0147757	0.078662	ambiguous	conserved-expression	2.16993	1.98783
FBgn0081674	261	237	132	86	258.973	238.712	132.079	86.0517	0.420824	0.0155796	0.106939	ambiguous	conserved-expression	0.618129	0.500597
FBgn0077220	241	251	100	146	239.128	252.813	100.06	146.088	0.68853	0.0212807	0.120198	ambiguous	conserved-expression	0.545968	0.465683
FBgn0072218	8	17	5	19	7.93787	17.1228	5.003	19.0114	0.112901	0.0220418	0.584022	ambiguous	dominant	1.926	0.816906
FBgn0080705	3777	3724	1355	1441	3747.67	3882.77	1355.81	1492.56	0.321133	0.0427645	0.338259	ambiguous	under-dominant	0.13863	0.0875345
FBgn0080966	314	351	100	154	311.561	353.535	100.06	154.093	0.197542	0.00584247	0.121301	ambiguous	under-dominant	0.62293	0.440593
FBgn0080501	24	11	10	1	23.8136	11.0794	10.006	1.0006	0.0527014	0.0246427	0.246836	ambiguous	conserved-expression	3.32193	2.21803
FBgn0081021	74	81	22	47	73.4253	81.585	22.0132	47.0282	0.640295	0.0169834	0.0928693	ambiguous	conserved-expression	1.09516	0.94313
FBgn0247390	15	20	4	21	14.8835	20.1444	4.0024	21.0126	0.490552	0.00395135	0.0840752	ambiguous	conserved-expression	2.39232	1.95565
FBgn0076399	170	206	50	81	168.68	207.488	50.03	81.0487	0.0952297	0.0374967	0.353587	ambiguous	dominant	0.695994	0.397253
FBgn0075094	34	52	9	25	33.7359	52.3756	9.00541	25.015	0.084979	0.0322909	0.354995	ambiguous	conserved-expression	1.47393	0.839324
FBgn0071259	12	21	0	9	11.9068	21.1517	1	9.00541	0.175638	0.0395671	0.224024	ambiguous	conserved-expression	3.17079	2.34181
FBgn0081622	860	916	456	596	853.321	922.616	456.274	596.358	0.213954	0.000197767	0.0571085	ambiguous	over-dominant	0.386279	0.273637
FBgn0080354	32	52	8	26	31.7515	52.3756	8.00481	26.0156	0.0503546	0.0124037	0.284754	ambiguous	conserved-expression	1.70044	0.978369
FBgn0064419	251	297	115	171	249.051	299.145	115.069	171.103	0.0736286	0.00732286	0.308869	ambiguous	conserved-expression	0.572362	0.307956
FBgn0077530	192	165	122	83	190.509	166.192	122.073	83.0499	0.254806	0.0412535	0.32477	ambiguous	conserved-expression	0.555698	0.358688
FBgn0076384	95	125	35	71	94.2622	125.903	35.021	71.0427	0.0692558	0.00412641	0.214936	ambiguous	conserved-expression	1.02046	0.602905
FBgn0079343	439	434	264	205	435.59	437.134	264.159	205.123	0.967842	0.0428137	0.0848194	ambiguous	conserved-expression	0.364914	0.359809
FBgn0081004	38	54	10	34	37.7049	54.39	10.006	34.0204	0.144544	0.00230604	0.104312	ambiguous	conserved-expression	1.76553	1.23694
FBgn0071851	71	76	23	45	70.4486	76.5489	23.0138	45.027	0.735263	0.0404286	0.14273	ambiguous	conserved-expression	0.968291	0.84848
FBgn0072755	1179	1267	479	609	1169.84	1276.15	479.288	609.366	0.0895304	0.000833615	0.111046	ambiguous	dominant	0.346417	0.220933
FBgn0072830	280	276	176	229	277.825	277.993	176.106	229.138	0.952754	0.0427645	0.130455	ambiguous	over-dominant	0.379772	0.3789
FBgn0250101	61	46	39	12	60.5262	46.3322	39.0234	12.0072	0.235602	0.00146739	0.0523776	ambiguous	conserved-expression	1.70044	1.3149
FBgn0244871	1150	1209	423	539	1141.07	1217.73	423.254	539.324	0.245838	0.00174189	0.073459	ambiguous	under-dominant	0.349628	0.255817
FBgn0249917	35	31	59	24	34.7282	31.2239	59.0354	24.0144	0.730145	0.00137042	0.0728574	ambiguous	over-dominant	1.29768	1.14422
FBgn0073558	1026	1072	532	666	1018.03	1079.74	532.32	666.4	0.337668	0.00106627	0.0770341	ambiguous	over-dominant	0.324096	0.239191
FBgn0072529	23	34	5	23	22.8214	34.2456	5.003	23.0138	0.210591	0.00414458	0.107733	ambiguous	conserved-expression	2.20163	1.6161
FBgn0080924	15	10	10	0	14.8835	10.0722	10.006	1	0.426844	0.0246375	0.134927	ambiguous	conserved-expression	3.32279	2.75946
FBgn0250422	23	35	4	16	22.8214	35.2528	4.0024	16.0096	0.172231	0.0342166	0.244512	ambiguous	conserved-expression	2	1.37265
FBgn0081839	301	415	223	246	298.662	417.997	223.134	246.148	4.88323e-05	0.506123	0.13314	ambiguous	dominant	0.141615	0.343364
FBgn0073307	298	380	159	157	295.686	382.744	159.096	157.094	0.0031388	0.984537	0.134927	ambiguous	dominant	0.0182622	0.354056
FBgn0070129	158	119	113	98	156.773	119.859	113.068	98.0589	0.0434704	0.556914	0.6776	ambiguous	over-dominant	0.205469	0.181863
FBgn0250222	54	126	24	75	53.5806	17.1922	24.0144	10.1662	3.18328e-05	0.0803785	0.531011	ambiguous	additive	1.24012	0.399833
FBgn0244425	11	25	0	6	10.9146	25.1806	1	6.0036	0.034776	0.164314	0.565868	ambiguous	dominant	2.58583	1.37977
FBgn0075192	442	555	109	121	438.567	559.008	109.065	121.073	0.000682166	0.649267	0.543701	ambiguous	under-dominant	0.150679	0.199393
FBgn0070105	153	113	109	95	151.812	113.816	109.065	95.0571	0.0335298	0.586673	0.613871	ambiguous	over-dominant	0.198329	0.217249
FBgn0248534	440	363	246	233	436.583	365.622	246.148	233.14	0.0193564	0.785313	0.481654	ambiguous	dominant	0.0783284	0.177575
FBgn0074969	792	958	361	426	785.849	964.919	361.217	426.256	0.000133913	0.0817543	0.793462	ambiguous	dominant	0.238855	0.0573014
FBgn0070845	151	265	89	123	149.827	266.914	89.0535	123.074	7.10461e-08	0.0830369	0.29977	ambiguous	additive	0.466781	0.366293
FBgn0245713	94	192	71	101	93.2699	193.387	71.0427	101.061	2.08537e-08	0.0921973	0.159933	ambiguous	dominant	0.508464	0.54354
FBgn0074646	821	991	314	355	814.624	998.157	314.189	355.213	0.000119392	0.273373	0.573551	ambiguous	under-dominant	0.177054	0.116079
FBgn0073641	349	285	95	77	346.289	287.058	95.0571	77.0463	0.029273	0.39705	0.944781	ambiguous	under-dominant	0.303069	0.0324347
FBgn0263062	418	348	237	227	414.754	350.513	237.142	227.136	0.0308831	0.839584	0.482519	ambiguous	dominant	0.0621948	0.18059
FBgn0072286	303	213	177	135	300.647	221.605	177.106	139.531	0.00111845	0.144138	0.79371	ambiguous	dominant	0.344034	0.0960437
FBgn0078287	145	214	135	178	143.874	215.546	135.081	178.107	0.000622544	0.0680028	0.608266	ambiguous	over-dominant	0.398918	0.184271
FBgn0074759	141	246	71	80	139.905	247.777	71.0427	80.0481	2.87469e-07	0.682478	0.0716707	ambiguous	dominant	0.172181	0.652413
FBgn0250446	201	144	99	105	199.439	145.04	99.0595	105.063	0.00652333	0.826184	0.103733	ambiguous	dominant	0.0848889	0.374607
FBgn0077973	12	44	10	10	11.9068	44.3178	10.006	10.006	3.66912e-05	0.998184	0.0639723	ambiguous	dominant	0	1.8961
FBgn0070778	1212	1007	627	554	1202.59	1014.27	627.377	554.333	0.00010118	0.150896	0.697596	ambiguous	dominant	0.178579	0.0671158
FBgn0072979	183	81	55	44	181.579	81.585	55.033	44.0264	1.94731e-09	0.518461	0.0641346	ambiguous	dominant	0.321928	0.832291
FBgn0075482	62	89	47	46	61.5185	89.6428	47.0282	46.0276	0.0479777	0.978807	0.28731	ambiguous	dominant	0.0310269	0.512141
FBgn0074005	282	342	105	144	279.81	344.47	105.063	144.087	0.0266618	0.0629019	0.663847	ambiguous	dominant	0.455679	0.155748
FBgn0073224	45	69	17	16	44.6505	69.4983	17.0102	16.0096	0.0429754	0.945859	0.384289	ambiguous	dominant	0.0874628	0.550839
FBgn0078355	177	126	65	62	175.625	126.91	65.0391	62.0373	0.00964098	0.915268	0.365697	ambiguous	dominant	0.0681715	0.400523
FBgn0080783	198	100	90	74	196.462	100.722	90.0541	74.0445	8.09063e-08	0.454794	0.0642246	ambiguous	dominant	0.2824	0.68147
FBgn0249094	171	107	71	48	169.672	107.773	71.0427	48.0288	0.000467021	0.139596	0.88063	ambiguous	dominant	0.564785	0.0899702
FBgn0246553	963	766	420	353	955.521	771.532	420.252	353.212	1.78606e-05	0.0869313	0.793209	ambiguous	dominant	0.250721	0.0578395
FBgn0070371	496	576	309	357	492.148	580.16	309.186	357.214	0.022414	0.185003	0.913356	ambiguous	over-dominant	0.208317	0.0290422
FBgn0246470	407	271	125	95	403.839	272.957	125.075	95.0571	1.26974e-06	0.164996	0.645599	ambiguous	under-dominant	0.395929	0.169177
FBgn0080823	332	404	222	235	329.421	406.918	222.133	235.141	0.0135843	0.734034	0.371524	ambiguous	dominant	0.0821011	0.222702
FBgn0071505	206	150	106	110	204.4	151.083	106.064	110.066	0.00879918	0.887441	0.141029	ambiguous	dominant	0.0534393	0.382612
FBgn0080939	454	379	172	130	450.474	381.737	172.103	130.078	0.0263003	0.0814759	0.592491	ambiguous	under-dominant	0.403897	0.165033
FBgn0076675	129	176	95	94	127.998	177.271	95.0571	94.0565	0.0133692	0.998184	0.181755	ambiguous	dominant	0.0152668	0.454568
FBgn0074721	904	660	432	378	896.979	664.767	432.26	378.227	9.52587e-09	0.210152	0.153349	ambiguous	dominant	0.192645	0.239581
FBgn0078531	57	99	38	38	56.5573	99.715	38.0228	38.0228	0.00174096	0.998184	0.130762	ambiguous	conserved-expression	0	0.818097
FBgn0081605	189	256	97	105	187.532	257.849	97.0583	105.063	0.00303325	0.761648	0.325541	ambiguous	dominant	0.114333	0.345056
FBgn0247905	49	75	28	23	48.6194	75.5417	28.0168	23.0138	0.0349155	0.720771	0.154167	ambiguous	conserved-expression	0.283793	0.351947
FBgn0075168	7	20	0	6	6.94563	20.1444	1	6.0036	0.0218805	0.164314	0.695236	ambiguous	dominant	2.58583	1.04963
FBgn0081667	300	358	203	188	297.67	360.586	203.122	188.113	0.0374549	0.706019	0.109624	ambiguous	dominant	0.110747	0.165881
FBgn0074385	1301	1042	530	458	1290.9	1049.53	530.318	458.275	1.065e-06	0.110791	0.615917	ambiguous	dominant	0.210645	0.0879902
FBgn0073730	259	135	77	53	256.988	135.975	77.0463	53.0318	3.04993e-09	0.141161	0.385197	ambiguous	dominant	0.538866	0.379496
FBgn0080308	741	853	450	462	735.245	859.161	450.27	462.278	0.00782244	0.821152	0.266553	ambiguous	dominant	0.0379679	0.186735
FBgn0075259	857	714	308	284	850.344	719.157	308.185	284.171	0.00150156	0.594085	0.569062	ambiguous	under-dominant	0.117039	0.124701
FBgn0076964	612	724	425	432	607.247	729.229	425.255	432.26	0.00367568	0.887818	0.154515	ambiguous	over-dominant	0.0235685	0.24052
FBgn0070083	132	92	27	25	130.975	92.6644	27.0162	25.015	0.0189591	0.905604	0.581146	ambiguous	under-dominant	0.111031	0.38817
FBgn0080488	230	389	88	104	228.214	391.809	88.0529	104.062	5.37923e-10	0.471279	0.0857349	ambiguous	dominant	0.241008	0.538759
FBgn0078821	435	245	155	125	431.622	246.769	155.093	125.075	3.83683e-12	0.233245	0.0632691	ambiguous	dominant	0.31034	0.496263
FBgn0079712	222	124	93	76	220.276	124.896	93.0559	76.0457	8.04532e-07	0.425935	0.152031	ambiguous	additive	0.291231	0.527358
XLOC_015119	281	215	177	155	278.818	216.553	177.106	155.093	0.00928015	0.479428	0.593994	ambiguous	dominant	0.191481	0.173122
FBgn0078765	49	86	21	36	48.6194	86.6211	21.0126	36.0216	0.00314079	0.159175	0.950409	ambiguous	dominant	0.777608	0.0555781
FBgn0247401	248	151	83	75	246.074	152.091	83.0499	75.0451	6.61615e-06	0.754898	0.130933	ambiguous	dominant	0.146221	0.54794
FBgn0249612	118	60	38	28	117.084	60.4333	38.0228	28.0168	5.34705e-05	0.458405	0.415328	ambiguous	dominant	0.440573	0.513549
FBgn0078996	262	384	124	162	259.965	386.773	124.075	162.097	4.25945e-06	0.0984563	0.565019	ambiguous	dominant	0.385654	0.187517
FBgn0080657	401	532	177	205	397.886	535.842	177.106	205.123	4.1398e-05	0.339096	0.399646	ambiguous	dominant	0.211875	0.21758
FBgn0073309	245	377	100	117	243.097	379.723	100.06	117.07	3.52528e-07	0.470936	0.180704	ambiguous	dominant	0.226509	0.416905
FBgn0077418	946	842	528	525	938.653	848.081	528.317	525.315	0.0413139	0.998184	0.400269	ambiguous	over-dominant	0.00822051	0.138169
FBgn0078350	72	104	24	28	71.4408	104.751	24.0144	28.0168	0.0284848	0.772822	0.661059	ambiguous	dominant	0.222392	0.329753
FBgn0075408	1678	1431	692	668	1664.97	1441.34	692.416	668.401	8.36312e-05	0.77352	0.224712	ambiguous	dominant	0.0509239	0.157164
FBgn0249633	61	98	24	24	60.5262	98.7078	24.0144	24.0144	0.00689369	0.998184	0.297965	ambiguous	dominant	0	0.705603
FBgn0078343	258	312	126	160	255.996	314.253	126.076	160.096	0.0378925	0.150656	0.899738	ambiguous	conserved-expression	0.344648	0.0488425
FBgn0243916	285	204	102	105	282.787	205.473	102.061	105.063	0.000978759	0.915471	0.11083	ambiguous	dominant	0.0418202	0.418942
FBgn0078840	139	87	97	78	137.92	87.6283	97.0583	78.0469	0.00176556	0.368954	0.437176	ambiguous	dominant	0.314511	0.339856
FBgn0079935	157	262	65	91	155.781	263.892	65.0391	91.0547	8.61432e-07	0.133717	0.516968	ambiguous	dominant	0.485427	0.275006
FBgn0246042	222	312	92	102	220.276	314.253	92.0553	102.061	0.000229165	0.689082	0.289378	ambiguous	dominant	0.148863	0.363754
FBgn0077175	177	230	57	47	175.625	231.661	57.0342	47.0282	0.0155935	0.580956	0.103063	ambiguous	under-dominant	0.278301	0.121214
FBgn0071874	128	182	81	87	127.006	183.314	81.0487	87.0523	0.00442958	0.809021	0.275968	ambiguous	dominant	0.103093	0.426332
FBgn0247464	19	36	6	2	18.8524	36.26	6.0036	2.0012	0.0389779	0.356025	0.0913846	ambiguous	dominant	1.58496	0.641334
FBgn0073517	114	154	67	67	113.115	155.112	67.0403	67.0403	0.0258221	0.998184	0.29229	ambiguous	conserved-expression	0	0.455527
FBgn0244484	236	316	146	162	234.167	318.282	146.088	162.097	0.00138568	0.585603	0.319146	ambiguous	dominant	0.150025	0.292743
FBgn0076258	23	29	13	6	22.8214	41.544	13.0078	8.53881	0.0404978	0.58289	0.173175	ambiguous	conserved-expression	0.607272	0.256983
FBgn0075410	256	326	159	184	254.012	328.354	159.096	184.111	0.00691692	0.37577	0.611252	ambiguous	dominant	0.210679	0.15968
FBgn0246351	38	16	10	10	37.7049	16.1156	10.006	10.006	0.00646231	0.998184	0.255941	ambiguous	dominant	0	1.2263
FBgn0071713	2702	2241	636	561	2681.01	2257.19	636.382	561.337	1.85379e-09	0.139473	0.658831	ambiguous	under-dominant	0.181026	0.0672283
FBgn0072098	332	423	112	142	329.421	426.055	112.067	142.085	0.00181907	0.184558	0.942489	ambiguous	under-dominant	0.342392	0.028713
FBgn0079950	162	86	41	23	160.742	86.6211	41.0246	23.0138	6.61615e-06	0.105576	0.942186	ambiguous	dominant	0.83399	0.0579645
FBgn0080166	881	661	454	420	874.158	665.774	454.273	420.252	2.3745e-07	0.518461	0.0761492	ambiguous	dominant	0.112303	0.280558
FBgn0072605	31	54	7	20	30.7592	54.39	7.00421	20.012	0.0234898	0.0558272	0.517978	ambiguous	dominant	1.51457	0.692251
FBgn0248319	382	309	195	197	379.033	311.232	195.117	197.118	0.0162501	0.95254	0.237426	ambiguous	dominant	0.0147215	0.269614
FBgn0246326	106	147	62	50	105.177	148.062	62.0373	50.03	0.0183665	0.505694	0.0550496	ambiguous	conserved-expression	0.31034	0.183042
FBgn0081058	680	510	292	267	674.719	513.683	292.175	267.16	6.50264e-06	0.555294	0.19074	ambiguous	dominant	0.129129	0.264278
FBgn0070583	796	598	422	396	789.818	602.319	422.254	396.238	1.08969e-06	0.640708	0.067934	ambiguous	dominant	0.0917426	0.29925
FBgn0079210	335	478	224	246	332.398	481.452	224.135	246.148	1.41067e-06	0.53018	0.0644367	ambiguous	dominant	0.13516	0.399321
FBgn0249997	528	452	164	176	523.899	455.264	164.099	176.106	0.04062	0.717875	0.224024	ambiguous	under-dominant	0.10188	0.100705
FBgn0073609	74	120	30	35	73.4253	120.867	30.018	35.021	0.00211503	0.741235	0.423036	ambiguous	dominant	0.222392	0.496676
FBgn0079820	165	98	62	38	163.719	98.7078	62.0373	38.0228	0.000146346	0.0803785	0.971304	ambiguous	dominant	0.706269	0.0237128
FBgn0078700	652	900	204	259	646.936	906.5	204.123	259.156	8.11774e-10	0.0509677	0.554291	ambiguous	under-dominant	0.344383	0.142301
FBgn0076401	77	117	45	44	76.402	117.845	45.027	44.0264	0.0082447	0.977661	0.194135	ambiguous	conserved-expression	0.0324215	0.592787
FBgn0073118	45	80	43	41	44.6505	80.5778	43.0258	41.0246	0.00373594	0.930913	0.0853275	ambiguous	dominant	0.0687128	0.782993
FBgn0075109	219	269	102	119	217.299	270.943	102.061	119.071	0.0382931	0.475945	0.818908	ambiguous	conserved-expression	0.222392	0.0959136
FBgn0072157	74	127	44	42	73.4253	127.917	44.0264	42.0252	0.000447364	0.932142	0.073459	ambiguous	dominant	0.0671142	0.733748
FBgn0076377	71	103	30	23	70.4486	103.744	30.018	23.0138	0.0275613	0.588144	0.115999	ambiguous	dominant	0.383329	0.175055
FBgn0079517	325	484	177	222	322.476	487.496	177.106	222.133	6.63936e-08	0.0964519	0.285268	ambiguous	additive	0.32681	0.269388
FBgn0250697	37	68	14	19	36.7126	68.4911	14.0084	19.0114	0.00522627	0.617446	0.628999	ambiguous	dominant	0.440573	0.459068
FBgn0249898	20	54	10	9	19.8447	54.39	10.006	9.00541	0.000173967	0.923333	0.10962	ambiguous	dominant	0.152003	1.30259
FBgn0070199	1609	1757	607	646	1596.5	1769.69	607.365	646.388	0.0133692	0.474358	0.713698	ambiguous	under-dominant	0.0898376	0.0587429
FBgn0078603	95	47	40	22	94.2622	47.3394	40.024	22.0132	0.000194471	0.0989292	0.878356	ambiguous	dominant	0.862496	0.13114
FBgn0012690	107	173	59	59	106.169	174.249	59.0354	59.0354	0.000199436	0.998184	0.0843466	ambiguous	dominant	0	0.714792
FBgn0070932	644	863	351	383	638.998	869.233	351.211	383.23	4.20869e-08	0.444456	0.0558208	ambiguous	additive	0.125873	0.318057
FBgn0076761	12	35	6	7	11.9068	35.2528	6.0036	7.00421	0.0016075	0.895316	0.31906	ambiguous	dominant	0.222392	1.34356
FBgn0078633	45	12	9	3	44.6505	12.0867	9.00541	3.0018	2.86673e-05	0.231558	0.880695	ambiguous	dominant	1.58496	0.300297
FBgn0079174	774	862	274	316	767.989	868.226	274.165	316.19	0.0404713	0.226583	0.911725	ambiguous	under-dominant	0.205749	0.0287636
XLOC_014421	196	137	118	87	194.478	137.989	118.071	87.0523	0.00388566	0.128281	0.908164	ambiguous	dominant	0.4397	0.0553475
FBgn0074103	99	139	39	62	98.2311	140.004	39.0234	62.0373	0.0177193	0.0924589	0.798387	ambiguous	dominant	0.668794	0.157579
FBgn0079506	245	324	131	125	243.097	326.34	131.079	125.075	0.00188804	0.876352	0.0801646	ambiguous	dominant	0.0676387	0.357204
FBgn0070381	546	452	236	256	541.759	455.264	236.142	256.154	0.00990423	0.585568	0.0725372	ambiguous	conserved-expression	0.117357	0.133591
FBgn0079022	252	334	170	187	250.043	336.412	170.102	187.112	0.00145945	0.590416	0.29012	ambiguous	dominant	0.137504	0.290552
FBgn0079365	435	313	222	188	431.622	315.261	222.133	188.113	4.6685e-05	0.276181	0.418415	ambiguous	dominant	0.239827	0.213395
FBgn0076097	6	40	2	1	5.9534	40.2889	2.0012	1.0006	5.29177e-07	0.76763	0.120441	ambiguous	dominant	1	1.7586
FBgn0080565	419	556	266	305	415.746	560.016	266.16	305.183	2.66572e-05	0.256649	0.281131	ambiguous	dominant	0.197383	0.232382
FBgn0070139	64	96	50	45	63.5029	96.6933	50.03	45.027	0.0212533	0.809021	0.127038	ambiguous	dominant	0.152003	0.45459
FBgn0079453	475	570	276	283	471.311	574.117	276.166	283.17	0.00569743	0.87167	0.236031	ambiguous	dominant	0.0361338	0.248531
FBgn0249081	118	177	84	100	117.084	178.278	84.0505	100.06	0.00132446	0.459741	0.370739	ambiguous	dominant	0.251539	0.355054
FBgn0081096	76	49	38	22	75.4097	49.3539	38.0228	22.0132	0.0346898	0.147935	0.833735	ambiguous	conserved-expression	0.788496	0.176909
FBgn0078880	17	49	7	11	16.868	49.3539	7.00421	11.0066	0.0001785	0.582689	0.466338	ambiguous	dominant	0.652077	0.896801
FBgn0246318	503	364	287	261	499.093	366.629	287.172	261.157	1.54984e-05	0.531627	0.143987	ambiguous	dominant	0.137001	0.307988
FBgn0244254	281	411	118	159	278.818	413.968	118.071	159.096	2.09293e-06	0.0638454	0.684545	ambiguous	dominant	0.43024	0.139959
FBgn0245344	730	827	321	324	724.33	832.973	321.193	324.195	0.0203737	0.940818	0.329319	ambiguous	dominant	0.0134205	0.188201
FBgn0074777	29	63	16	17	28.7748	63.455	16.0096	17.0102	0.000893324	0.934999	0.197545	ambiguous	dominant	0.0874628	1.05347
FBgn0074372	710	533	300	262	704.486	536.849	300.18	262.157	4.23266e-06	0.309233	0.352964	ambiguous	dominant	0.195396	0.196657
FBgn0246286	246	352	176	199	244.089	354.542	176.106	199.12	3.66393e-05	0.449761	0.159041	ambiguous	dominant	0.177193	0.361355
FBgn0077824	325	411	197	226	322.476	413.968	197.118	226.136	0.00291306	0.349342	0.557594	ambiguous	dominant	0.198127	0.162202
FBgn0073144	87	121	34	30	86.3243	121.874	34.0204	30.018	0.0324186	0.813402	0.237184	ambiguous	dominant	0.180572	0.316978
FBgn0249751	96	132	70	79	95.2544	132.953	70.0421	79.0475	0.0301956	0.679671	0.513319	ambiguous	dominant	0.174498	0.306565
FBgn0074316	377	488	194	228	374.072	491.524	194.117	228.137	0.000338055	0.251146	0.548275	ambiguous	dominant	0.232977	0.16097
FBgn0245152	302	417	163	167	299.654	420.012	163.098	167.1	4.33447e-05	0.906217	0.0680212	ambiguous	dominant	0.0349761	0.452153
FBgn0246345	356	284	187	192	353.235	286.051	187.112	192.115	0.0133128	0.889992	0.175851	ambiguous	dominant	0.038068	0.266288
FBgn0248780	14	47	10	21	13.8913	47.3394	10.006	21.0126	4.857e-05	0.160934	0.523937	ambiguous	dominant	1.07039	0.698475
FBgn0080925	53	103	39	51	52.5884	103.744	39.0234	51.0306	0.0001568	0.422169	0.284614	ambiguous	dominant	0.387023	0.593188
FBgn0072180	366	452	225	216	363.157	455.264	225.135	216.13	0.00479138	0.858004	0.0812557	ambiguous	dominant	0.0588937	0.267216
FBgn0081302	100	138	52	47	99.2233	138.997	52.0312	47.0282	0.0246967	0.813402	0.176682	ambiguous	dominant	0.145851	0.340448
FBgn0071086	733	831	405	381	727.307	837.002	405.243	381.229	0.0193532	0.664917	0.0739658	ambiguous	conserved-expression	0.0881309	0.114535
FBgn0078631	929	1203	652	733	921.785	1211.69	652.392	733.44	6.57375e-09	0.103591	0.0812557	ambiguous	over-dominant	0.168941	0.225576
FBgn0082028	863	970	478	469	856.297	977.006	478.287	469.282	0.017764	0.921836	0.159541	ambiguous	conserved-expression	0.0274227	0.162832
FBgn0081119	2532	2686	1492	1492	2512.33	2705.4	1492.9	1492.9	0.0343626	0.962579	0.246023	ambiguous	over-dominant	0	0.106813
FBgn0248785	247	307	142	188	245.082	309.217	142.085	188.113	0.018567	0.0545709	0.850467	ambiguous	dominant	0.404842	0.0694834
FBgn0081720	54	102	23	35	53.5806	102.737	23.0138	35.021	0.000298115	0.290681	0.656655	ambiguous	dominant	0.605721	0.333448
FBgn0247742	1421	1199	611	551	1409.96	1207.66	611.367	551.331	0.000114145	0.256831	0.655345	ambiguous	dominant	0.14912	0.0743241
FBgn0073704	348	248	211	168	345.297	249.791	211.127	168.101	0.000199912	0.122051	0.658219	ambiguous	dominant	0.328782	0.138335
FBgn0246610	7	175	1	0	6.94563	176.264	1.0006	1	2.14049e-42	0.998184	0.150199	ambiguous	dominant	0.000866529	4.66462
FBgn0071493	320	260	194	152	317.515	261.878	194.117	152.091	0.0328296	0.111426	0.83519	ambiguous	dominant	0.351985	0.0740558
FBgn0078483	194	124	130	101	192.493	124.896	130.078	101.061	0.000342271	0.197041	0.500381	ambiguous	dominant	0.364156	0.259929
FBgn0072585	1323	1086	414	385	1312.72	1093.84	414.249	385.231	1.34082e-05	0.578233	0.349439	ambiguous	under-dominant	0.104772	0.158386
FBgn0248894	127	203	60	83	126.014	204.466	60.036	83.0499	7.37868e-05	0.173591	0.62655	ambiguous	dominant	0.468149	0.230133
FBgn0076650	7529	7811	2820	2842	7470.52	7867.41	2821.69	2843.71	0.0148425	0.823662	0.320952	ambiguous	under-dominant	0.0112114	0.0634683
FBgn0078224	11	102	4	11	10.9146	102.737	4.0024	11.0066	4.3116e-19	0.204918	0.205486	ambiguous	dominant	1.45943	1.77519
FBgn0246061	159	246	89	107	157.765	247.777	89.0535	107.064	4.02534e-05	0.411219	0.282041	ambiguous	dominant	0.265734	0.385529
FBgn0078216	647	742	236	248	641.975	747.359	236.142	248.149	0.0164258	0.761648	0.529399	ambiguous	under-dominant	0.0715533	0.147731
FBgn0247819	80	52	12	12	79.3787	52.3756	12.0072	12.0072	0.0329905	0.998184	0.548848	ambiguous	under-dominant	0	0.599858
FBgn0076771	124	195	43	44	123.037	193.475	43.0258	43.3689	0.000310012	0.995231	0.176485	ambiguous	under-dominant	0.0114576	0.641598
FBgn0247162	161	117	61	45	159.75	117.845	61.0366	45.027	0.0210876	0.314964	0.999911	ambiguous	dominant	0.438884	3.71912e-05
FBgn0246245	127	64	36	24	126.014	64.4622	36.0216	24.0144	2.14777e-05	0.314001	0.582761	ambiguous	dominant	0.584963	0.382091
FBgn0247500	2964	3135	1462	1461	2940.98	3157.64	1462.88	1461.88	0.0282944	0.971316	0.251663	ambiguous	dominant	0.000987133	0.101564
FBgn0078248	176	250	78	100	174.633	251.806	78.0469	100.06	0.000754425	0.258774	0.695028	ambiguous	dominant	0.358454	0.169529
FBgn0250477	357	218	92	82	354.227	219.574	92.0553	82.0493	5.46769e-08	0.699908	0.113884	ambiguous	under-dominant	0.16601	0.523955
FBgn0072868	180	227	71	83	178.602	228.639	71.0427	83.0499	0.0332202	0.559796	0.785199	ambiguous	dominant	0.225292	0.131034
FBgn0070413	270	183	110	97	267.903	184.322	110.066	97.0583	0.000195719	0.625662	0.299696	ambiguous	dominant	0.181447	0.358038
FBgn0075498	204	283	115	109	202.416	285.044	115.069	109.065	0.000757975	0.863606	0.0551677	ambiguous	dominant	0.0773057	0.416558
FBgn0070157	808	1014	383	396	801.725	1021.32	383.23	396.238	2.90238e-06	0.791586	0.0563459	ambiguous	dominant	0.048156	0.301105
FBgn0248582	419	487	177	167	415.746	490.517	177.106	167.1	0.0363116	0.806945	0.195486	ambiguous	under-dominant	0.0839013	0.154701
XLOC_011506	113	54	41	33	112.122	54.39	41.0246	33.0198	1.99012e-05	0.604992	0.194899	ambiguous	dominant	0.313158	0.730503
FBgn0070268	1649	1499	733	755	1636.19	1509.83	733.44	755.454	0.0278199	0.734034	0.200208	ambiguous	dominant	0.0426634	0.0732968
FBgn0246256	38	94	28	38	37.7049	94.6789	28.0168	38.0228	2.80599e-06	0.43969	0.143935	ambiguous	dominant	0.440573	0.887719
FBgn0076155	132	72	37	27	130.975	72.52	37.0222	27.0162	0.000103321	0.447811	0.543701	ambiguous	dominant	0.454566	0.398273
FBgn0079485	51	30	18	11	50.6039	30.2167	18.0108	11.0066	0.0408003	0.42061	0.979244	ambiguous	dominant	0.710493	0.0334106
FBgn0248633	73	120	40	45	72.433	120.867	40.024	45.027	0.00161662	0.776375	0.289167	ambiguous	dominant	0.169925	0.568772
FBgn0072252	5	38	1	3	4.96117	38.2744	1.0006	3.0018	4.05644e-07	0.545334	0.666798	ambiguous	dominant	1.58496	1.36267
FBgn0078341	262	165	96	81	259.965	166.192	96.0577	81.0487	1.44473e-05	0.511964	0.274939	ambiguous	dominant	0.245112	0.400358
FBgn0080199	455	596	208	253	451.466	600.304	208.125	253.152	3.09511e-05	0.126446	0.621125	ambiguous	dominant	0.282554	0.128523
FBgn0077441	166	211	116	128	164.711	212.524	116.07	128.077	0.0343979	0.659401	0.539879	ambiguous	dominant	0.142019	0.225671
FBgn0078017	1302	1172	422	425	1291.89	1180.46	422.254	425.255	0.0305015	0.943505	0.405448	ambiguous	under-dominant	0.0102198	0.119906
FBgn0080586	18	37	6	10	17.8602	37.2672	6.0036	10.006	0.0196041	0.549177	0.834379	ambiguous	dominant	0.736966	0.324193
FBgn0075297	283	397	184	196	280.802	399.867	184.111	196.118	3.05558e-05	0.732918	0.0814838	ambiguous	dominant	0.0911479	0.41882
FBgn0070135	190	122	58	63	188.524	122.881	58.0348	63.0379	0.000456839	0.814054	0.0643927	ambiguous	dominant	0.119299	0.498189
FBgn0081549	8158	7264	3577	3453	8094.64	7316.46	3579.15	3455.07	1.04743e-10	0.42061	0.0765157	ambiguous	under-dominant	0.0508998	0.0949208
FBgn0262500	495	672	330	372	491.156	676.853	330.198	372.224	5.58035e-07	0.272673	0.11168	ambiguous	dominant	0.172837	0.289827
FBgn0078045	224	302	86	105	222.26	304.181	86.0517	105.063	0.00141286	0.369767	0.685518	ambiguous	dominant	0.287981	0.1647
FBgn0076484	122	88	41	41	121.052	88.6356	41.0246	41.0246	0.0422463	0.998184	0.419548	ambiguous	dominant	0	0.449675
FBgn0078300	466	648	232	253	462.381	652.68	232.139	253.152	1.32174e-07	0.555915	0.0664866	ambiguous	dominant	0.125013	0.372282
FBgn0248142	141	206	101	118	139.905	207.488	101.061	118.071	0.00108243	0.47341	0.338259	ambiguous	dominant	0.224432	0.344148
FBgn0079726	49	74	38	38	48.6194	74.5344	38.0228	38.0228	0.0422424	0.998184	0.306059	ambiguous	dominant	0	0.616374
FBgn0244358	201	151	47	43	199.439	152.091	47.0282	43.0258	0.0201591	0.847461	0.633014	ambiguous	under-dominant	0.128324	0.262692
FBgn0249182	513	667	173	195	509.016	671.817	173.104	195.117	1.66865e-05	0.470014	0.361384	ambiguous	under-dominant	0.172702	0.227657
FBgn0072075	332	186	142	114	329.421	187.343	142.085	114.068	1.22903e-09	0.247662	0.0875768	ambiguous	additive	0.316857	0.497393
FBgn0077709	36	64	31	36	35.7204	64.4622	31.0186	36.0216	0.0102759	0.744527	0.337734	ambiguous	dominant	0.215729	0.635977
FBgn0070913	125	187	61	79	124.029	188.351	61.0366	79.0475	0.00101468	0.309715	0.631837	ambiguous	dominant	0.373043	0.229697
FBgn0075902	44	20	25	14	43.6583	20.1444	25.015	14.0084	0.00652522	0.232544	0.798266	ambiguous	dominant	0.836501	0.279372
FBgn0078947	335	420	213	238	332.398	423.033	213.128	238.143	0.00369371	0.45354	0.469554	ambiguous	dominant	0.160108	0.187751
FBgn0073151	60	35	18	19	59.534	35.2528	18.0108	19.0114	0.0232505	0.938974	0.295015	ambiguous	dominant	0.0780025	0.677974
FBgn0076016	368	428	288	266	365.142	431.091	288.173	266.16	0.0499965	0.618478	0.0874259	ambiguous	over-dominant	0.114643	0.124893
FBgn0074306	192	116	59	40	190.509	116.838	59.0354	40.024	6.59585e-05	0.191732	0.811059	ambiguous	dominant	0.560715	0.144636
FBgn0074072	98	60	46	38	97.2389	60.4333	46.0276	38.0228	0.00683844	0.636383	0.494032	ambiguous	conserved-expression	0.275634	0.410554
FBgn0078471	44	23	25	15	43.6583	23.1661	25.015	15.009	0.0224825	0.299529	0.873796	ambiguous	conserved-expression	0.736966	0.177273
FBgn0245567	699	570	253	247	693.571	574.117	253.152	247.148	0.00136373	0.923637	0.265141	ambiguous	dominant	0.0346263	0.238073
FBgn0249665	860	730	313	292	853.321	735.272	313.188	292.175	0.00465649	0.661491	0.600567	ambiguous	under-dominant	0.100194	0.114615
FBgn0080320	858	626	248	216	851.336	630.521	248.149	216.13	2.22626e-08	0.356637	0.282087	ambiguous	under-dominant	0.199309	0.233875
FBgn0074426	129	75	64	52	127.998	75.5417	64.0385	52.0312	0.000548394	0.516358	0.34582	ambiguous	dominant	0.29956	0.461218
FBgn0079038	256	365	133	170	254.012	367.636	133.08	170.102	3.06623e-05	0.12222	0.57812	ambiguous	dominant	0.354109	0.179275
FBgn0080136	500	358	245	195	496.117	360.586	245.147	195.117	8.54292e-06	0.0887715	0.633049	ambiguous	dominant	0.329308	0.13103
FBgn0250139	19	6	5	6	18.8524	6.04333	5.003	6.0036	0.0178851	0.885502	0.19982	ambiguous	conserved-expression	0.263034	1.3783
FBgn0075881	25	48	20	29	24.8058	48.3467	20.012	29.0174	0.0139107	0.416866	0.63049	ambiguous	dominant	0.536053	0.426684
FBgn0244185	18	39	10	8	17.8602	39.2817	10.006	8.00481	0.0106623	0.821694	0.173519	ambiguous	dominant	0.321928	0.81518
FBgn0081598	17	4	14	6	16.868	4.02889	14.0084	6.0036	0.00825552	0.219176	0.617145	ambiguous	dominant	1.22239	0.84344
FBgn0075082	1964	1678	1136	1120	1948.75	1690.12	1136.68	1120.67	2.40961e-05	0.919167	0.0618876	ambiguous	over-dominant	0.0204641	0.184957
FBgn0249122	177	103	93	63	175.625	103.744	93.0559	63.0379	4.35491e-05	0.0815398	0.686389	ambiguous	dominant	0.561879	0.197595
FBgn0071844	259	208	120	94	256.988	209.502	120.072	94.0565	0.0437241	0.236603	0.895929	ambiguous	conserved-expression	0.352302	0.0575639
FBgn0245828	32	62	33	54	31.7515	62.4478	33.0198	54.0324	0.00419098	0.0992953	0.726933	ambiguous	dominant	0.710493	0.265334
FBgn0071653	553	353	301	244	548.705	355.549	301.181	244.147	3.78205e-10	0.0800983	0.122189	ambiguous	dominant	0.302882	0.323098
FBgn0247059	201	255	116	135	199.439	256.842	116.07	135.081	0.0199551	0.447811	0.69941	ambiguous	dominant	0.218835	0.146098
FBgn0074626	58	32	21	10	57.5495	32.2311	21.0126	10.006	0.0145337	0.165722	0.838564	ambiguous	dominant	1.07039	0.234039
FBgn0071402	81	124	62	75	80.3709	124.896	62.0373	75.0451	0.00554423	0.491126	0.454592	ambiguous	dominant	0.274622	0.361355
FBgn0080370	2049	1686	968	916	2033.09	1698.18	968.582	916.55	5.90277e-08	0.509863	0.0894342	ambiguous	additive	0.0796594	0.180025
FBgn0082071	709	592	404	343	703.493	596.276	404.243	343.206	0.00469399	0.121256	0.992659	ambiguous	dominant	0.236147	0.00241101
FBgn0072653	657	780	309	333	651.897	785.633	309.186	333.2	0.00201359	0.555742	0.428099	ambiguous	dominant	0.107915	0.161296
FBgn0248876	376	263	183	174	373.08	264.899	183.11	174.105	4.31715e-05	0.832209	0.090603	ambiguous	dominant	0.0727563	0.421283
FBgn0081760	35	16	5	5	34.7282	16.1156	5.003	5.003	0.0170193	0.998184	0.467999	ambiguous	dominant	0	1.10765
FBgn0075968	567	435	396	390	562.596	438.142	396.238	390.234	0.000167788	0.949859	0.0533053	ambiguous	over-dominant	0.0220263	0.338676
FBgn0072677	336	261	160	168	333.39	262.885	160.096	168.101	0.00698006	0.813402	0.113584	ambiguous	dominant	0.0703893	0.272391
FBgn0247275	630	735	224	269	625.107	740.308	224.135	269.162	0.0072401	0.143385	0.94436	ambiguous	under-dominant	0.264107	0.0200843
FBgn0079347	287	389	164	192	284.771	391.809	164.099	192.115	0.000198621	0.317488	0.404224	ambiguous	dominant	0.22741	0.23294
FBgn0073143	106	50	36	20	105.177	50.3611	36.0216	20.012	2.81984e-05	0.128488	0.797492	ambiguous	dominant	0.847997	0.214437
FBgn0075290	868	589	303	254	861.259	593.254	303.182	254.153	5.32465e-12	0.156448	0.142651	ambiguous	dominant	0.254489	0.283307
FBgn0244362	2905	2455	1127	1021	2882.44	2472.73	1127.68	1021.61	2.32173e-08	0.118949	0.480954	ambiguous	under-dominant	0.142505	0.0786798
FBgn0078419	852	678	621	546	845.383	682.897	621.373	546.328	6.00185e-05	0.132192	0.470624	ambiguous	over-dominant	0.185692	0.122245
FBgn0079873	70	146	65	97	69.4563	147.054	65.0391	97.0583	6.73506e-07	0.0576424	0.245656	ambiguous	dominant	0.577545	0.504627
FBgn0080638	110	59	55	49	109.146	59.4261	55.033	49.0294	0.00030676	0.774558	0.145031	ambiguous	dominant	0.16665	0.710436
FBgn0081883	1486	1337	753	725	1474.46	1346.66	753.452	725.436	0.0194827	0.73894	0.604761	ambiguous	dominant	0.0546689	0.0761351
FBgn0262503	801	619	250	245	794.779	623.471	250.15	245.147	1.09284e-05	0.9406	0.103853	ambiguous	under-dominant	0.0291463	0.321086
FBgn0072889	162	240	83	97	160.742	241.733	83.0499	97.0583	0.000240682	0.525145	0.329319	ambiguous	dominant	0.224873	0.363798
FBgn0072931	519	348	209	180	514.969	350.513	209.126	180.108	6.07832e-08	0.361243	0.152158	ambiguous	dominant	0.215506	0.33951
XLOC_012799	18	3	3	0	17.8602	3.02167	3.0018	1	0.0016886	0.549177	0.779141	ambiguous	dominant	1.58583	0.977503
FBgn0247672	291	170	110	80	288.74	171.228	110.066	80.0481	1.23832e-07	0.12538	0.435038	ambiguous	dominant	0.459432	0.294422
FBgn0248425	3659	3377	1702	1654	3630.58	3401.39	1703.02	1654.99	0.00552592	0.712739	0.579923	ambiguous	dominant	0.0412718	0.0528047
FBgn0079094	205	127	50	47	203.408	127.917	50.03	47.0282	8.27163e-05	0.896528	0.207014	ambiguous	dominant	0.0892673	0.579897
FBgn0076686	1040	1378	518	597	1031.92	1387.95	518.311	597.359	1.41567e-11	0.0728743	0.105232	ambiguous	dominant	0.204779	0.222844
FBgn0077648	96	153	43	62	95.2544	154.105	43.0258	62.0373	0.000709971	0.195323	0.782172	ambiguous	dominant	0.527932	0.166125
FBgn0248789	140	100	39	34	138.913	100.722	39.0234	34.0204	0.0240302	0.774218	0.6776	ambiguous	dominant	0.197939	0.265857
FBgn0074801	745	615	422	383	739.214	619.442	422.254	383.23	0.00191383	0.41399	0.568881	ambiguous	dominant	0.139899	0.115125
FBgn0249270	32	14	12	11	31.7515	14.1011	12.0072	11.0066	0.0170935	0.930913	0.334346	ambiguous	conserved-expression	0.125531	1.04548
FBgn0076679	782	628	237	217	775.926	632.536	237.142	217.13	0.000240703	0.615925	0.47651	ambiguous	under-dominant	0.127192	0.167581
FBgn0070687	348	248	211	168	345.297	249.791	211.127	168.101	0.000199912	0.122051	0.658219	ambiguous	dominant	0.328782	0.138335
FBgn0070500	602	518	260	236	597.324	521.741	260.156	236.142	0.0341256	0.545334	0.844474	ambiguous	dominant	0.139725	0.0554559
FBgn0073244	97	156	48	53	96.2466	157.127	48.0288	53.0318	0.000495926	0.79589	0.235427	ambiguous	dominant	0.142958	0.564162
FBgn0080739	325	507	156	185	322.476	510.662	156.094	185.111	8.73842e-10	0.284532	0.0865256	ambiguous	dominant	0.245979	0.417198
FBgn0246791	15	30	12	10	14.8835	30.2167	12.0072	10.006	0.0443437	0.839584	0.222317	ambiguous	conserved-expression	0.263034	0.758596
FBgn0248772	523	433	239	223	518.938	436.127	239.144	223.134	0.0118137	0.714969	0.554798	ambiguous	conserved-expression	0.0999669	0.150846
FBgn0245299	19	39	14	14	18.8524	39.2817	14.0084	14.0084	0.0165757	0.998184	0.264818	ambiguous	conserved-expression	0	1.05911
FBgn0080226	961	1253	438	498	953.536	1262.05	438.263	498.299	1.2229e-09	0.155393	0.145505	ambiguous	dominant	0.185215	0.219194
FBgn0078788	152	202	70	80	150.819	203.459	70.0421	80.0481	0.0145247	0.640708	0.592432	ambiguous	dominant	0.192645	0.23927
FBgn0078797	65	40	40	25	64.4952	40.2889	40.024	25.015	0.0322063	0.204918	0.999243	ambiguous	dominant	0.678072	0.000737087
FBgn0079846	1137	1316	584	654	1128.17	1325.5	584.351	654.393	0.000476945	0.145742	0.677543	ambiguous	conserved-expression	0.163322	0.0692357
FBgn0248655	702	515	324	292	696.548	518.719	324.195	292.175	7.75458e-07	0.447814	0.150199	ambiguous	dominant	0.150025	0.275242
FBgn0261498	135	71	71	54	133.952	71.5128	71.0427	54.0324	3.42366e-05	0.329582	0.279784	ambiguous	dominant	0.39486	0.510578
FBgn0071585	9	48	3	12	8.9301	48.3467	3.0018	12.0072	2.95882e-07	0.0771586	0.822369	ambiguous	dominant	2	0.436668
FBgn0073159	646	524	281	297	640.983	527.784	281.169	297.178	0.00161292	0.704625	0.0537412	ambiguous	conserved-expression	0.0798928	0.200444
FBgn0076186	125	182	69	75	124.029	183.314	69.0415	75.0451	0.00243848	0.791586	0.284614	ambiguous	conserved-expression	0.120294	0.443347
FBgn0073827	59	107	19	28	58.5418	107.773	19.0114	28.0168	0.00046933	0.404504	0.692977	ambiguous	dominant	0.559427	0.321027
FBgn0075232	836	696	474	454	829.507	701.027	474.285	454.273	0.0016568	0.76368	0.286945	ambiguous	over-dominant	0.0621948	0.18059
FBgn0075803	246	182	94	90	244.089	183.314	94.0565	90.0541	0.00622321	0.903625	0.336998	ambiguous	dominant	0.0627358	0.350353
FBgn0080656	236	288	118	120	234.167	290.08	118.071	120.072	0.0373767	0.945172	0.386864	ambiguous	conserved-expression	0.0242475	0.284665
FBgn0078549	99	67	64	56	98.2311	67.4839	64.0385	56.0336	0.0298894	0.710171	0.51347	ambiguous	dominant	0.192645	0.348992
FBgn0246238	54	33	27	22	53.5806	33.2383	27.0162	22.0132	0.0497055	0.713048	0.641577	ambiguous	conserved-expression	0.295456	0.393407
FBgn0072210	56	29	29	15	55.5651	29.2094	29.0174	15.009	0.0084137	0.133678	0.98487	ambiguous	conserved-expression	0.95109	0.0233472
FBgn0248242	21	8	5	2	20.8369	8.05778	5.003	2.0012	0.0303207	0.487465	0.986518	ambiguous	dominant	1.32193	0.0487586
FBgn0080950	198	264	82	114	196.462	265.907	82.0493	114.068	0.00422508	0.0922719	0.934915	ambiguous	dominant	0.475338	0.0386698
FBgn0246843	160	241	62	92	158.757	242.741	62.0373	92.0553	0.000128922	0.0711521	0.934929	ambiguous	dominant	0.569366	0.0432263
FBgn0072024	260	364	103	114	257.981	366.629	103.062	114.068	7.51847e-05	0.67246	0.258945	ambiguous	dominant	0.146389	0.360668
FBgn0247543	82	47	43	37	81.3631	47.3394	43.0258	37.0222	0.00558474	0.736818	0.344978	ambiguous	dominant	0.216811	0.564521
FBgn0249572	1008	1185	461	471	1000.17	1193.56	461.277	471.283	0.000264399	0.851432	0.134927	ambiguous	dominant	0.0309603	0.224062
FBgn0075215	315	218	81	74	312.554	219.574	81.0487	74.0445	0.000127228	0.789829	0.313656	ambiguous	under-dominant	0.130397	0.378996
FBgn0075238	127	67	54	39	126.014	67.4839	54.0324	39.0234	6.50759e-05	0.314001	0.436388	ambiguous	conserved-expression	0.469485	0.431479
FBgn0074531	67	36	26	27	66.4796	36.26	26.0156	27.0162	0.00589861	0.948884	0.16073	ambiguous	conserved-expression	0.0544478	0.820086
FBgn0075743	15	31	14	9	14.8835	31.2239	14.0084	9.00541	0.0329593	0.543363	0.0793205	ambiguous	conserved-expression	0.63743	0.431507
FBgn0081594	54	92	38	34	53.5806	92.6644	38.0228	34.0204	0.00356916	0.82558	0.0797179	ambiguous	conserved-expression	0.160465	0.629841
FBgn0245162	354	489	156	165	351.251	492.532	156.094	165.099	8.322e-06	0.786203	0.101747	ambiguous	dominant	0.08092	0.406796
FBgn0074290	222	324	114	131	220.276	326.34	114.068	131.079	3.24215e-05	0.500608	0.237274	ambiguous	dominant	0.200533	0.366532
FBgn0079497	313	369	153	176	310.569	371.665	153.092	176.106	0.0488328	0.414954	0.874232	ambiguous	conserved-expression	0.202044	0.0570451
FBgn0244992	112	78	50	42	111.13	78.5633	50.03	42.0252	0.0315064	0.654047	0.684134	ambiguous	conserved-expression	0.251539	0.248783
FBgn0070802	87	46	29	18	86.3243	46.3322	29.0174	18.0108	0.00116194	0.290863	0.816905	ambiguous	dominant	0.688056	0.209695
FBgn0073779	146	186	89	88	144.866	187.343	89.0535	88.0529	0.0462547	0.998184	0.311268	ambiguous	conserved-expression	0.0163018	0.354663
FBgn0080962	17	6	5	6	16.868	6.04333	5.003	6.0036	0.0399029	0.885502	0.252589	ambiguous	conserved-expression	0.263034	1.21784
FBgn0248732	2749	2411	1108	990	2727.65	2428.41	1108.67	990.595	3.33396e-05	0.0675747	0.970527	ambiguous	under-dominant	0.162457	0.00518708
FBgn0079714	203	262	112	115	201.423	263.892	112.067	115.069	0.0114096	0.918904	0.287521	ambiguous	conserved-expression	0.0381351	0.351583
FBgn0246854	123	74	36	28	122.045	74.5344	36.0216	28.0168	0.00155089	0.565249	0.602034	ambiguous	dominant	0.36257	0.34886
FBgn0075621	16	31	12	10	15.8757	31.2239	12.0072	10.006	0.0496893	0.839584	0.237539	ambiguous	conserved-expression	0.263034	0.712793
FBgn0078255	2306	2531	1156	1161	2288.09	2549.28	1156.69	1161.7	0.00143283	0.926186	0.119398	ambiguous	dominant	0.00622657	0.149719
FBgn0075768	48	84	26	21	47.6272	84.6067	26.0156	21.0126	0.00370312	0.706019	0.0748874	ambiguous	dominant	0.308122	0.520863
FBgn0082118	1025	1180	502	501	1017.04	1188.52	502.302	501.301	0.00150579	0.998184	0.115633	ambiguous	dominant	0.00287676	0.221917
FBgn0080945	824	932	410	484	817.6	938.731	410.246	484.291	0.0145574	0.0585489	0.852761	ambiguous	conserved-expression	0.239383	0.0400668
FBgn0071480	226	297	154	157	224.245	299.145	154.093	157.094	0.00373408	0.926439	0.163099	ambiguous	dominant	0.0278342	0.387937
FBgn0075950	903	668	427	381	895.987	672.824	427.257	381.229	3.92584e-08	0.306945	0.134927	ambiguous	dominant	0.164445	0.248802
FBgn0250204	20	8	13	4	19.8447	8.05778	13.0078	4.0024	0.0435369	0.108951	0.825351	ambiguous	conserved-expression	1.70044	0.400142
FBgn0077426	468	309	192	150	464.365	311.232	192.115	150.09	1.03364e-07	0.108702	0.432172	ambiguous	dominant	0.356144	0.221127
FBgn0082100	304	243	195	163	301.639	244.755	195.117	163.098	0.0243619	0.269957	0.906423	ambiguous	dominant	0.258602	0.0428821
FBgn0071687	75	107	41	39	74.4175	107.773	41.0246	39.0234	0.0314652	0.928688	0.265751	ambiguous	conserved-expression	0.0721498	0.462129
FBgn0074732	1972	1731	864	842	1956.68	1743.5	864.519	842.506	0.000564396	0.830216	0.276635	ambiguous	dominant	0.0372111	0.129212
XLOC_016126	61	34	16	18	60.5262	34.2456	16.0096	18.0108	0.0134419	0.867999	0.215181	ambiguous	dominant	0.169925	0.651719
FBgn0074160	72	110	34	54	71.4408	110.794	34.0204	54.0324	0.00967559	0.123311	0.96124	ambiguous	conserved-expression	0.667425	0.0343592
FBgn0071862	72	47	34	24	71.4408	47.3394	34.0204	24.0144	0.0462571	0.419409	0.918333	ambiguous	conserved-expression	0.5025	0.0912051
FBgn0073016	71	116	36	31	70.4486	116.838	36.0216	31.0186	0.00220467	0.762119	0.0768631	ambiguous	dominant	0.215729	0.514136
FBgn0081005	29	12	16	15	28.7748	12.0867	16.0096	15.009	0.0167759	0.943505	0.239372	ambiguous	dominant	0.0931094	1.15828
FBgn0078715	159	237	103	115	157.765	238.712	103.062	115.069	0.000215042	0.640708	0.188568	ambiguous	dominant	0.15899	0.438501
FBgn0078897	393	464	148	182	389.948	467.351	148.089	182.109	0.0242084	0.186414	0.916304	ambiguous	dominant	0.298341	0.0371151
FBgn0076330	81	28	20	17	80.3709	28.2022	20.012	17.0102	1.2511e-06	0.813402	0.0859175	ambiguous	dominant	0.234465	1.2764
FBgn0082001	6	20	2	8	5.9534	20.1444	2.0012	8.00481	0.0107787	0.169205	0.923068	ambiguous	conserved-expression	2	0.241404
FBgn0249021	29	10	16	6	28.7748	11.094	16.0096	6.61267	0.00967145	0.16464	0.950409	ambiguous	conserved-expression	1.27563	0.0993847
FBgn0081693	83	49	29	26	82.3554	49.3539	29.0174	26.0156	0.00810708	0.855883	0.396636	ambiguous	dominant	0.157541	0.581158
FBgn0080922	48	27	33	17	47.6272	27.195	33.0198	17.0102	0.0325838	0.102099	0.885006	ambiguous	dominant	0.956931	0.148487
FBgn0077986	295	203	97	86	292.709	204.466	97.0583	86.0517	0.00017346	0.670008	0.337734	ambiguous	dominant	0.173648	0.343956
FBgn0247665	136	79	88	57	134.944	79.5706	88.0529	57.0342	0.000368703	0.0568687	0.810636	ambiguous	dominant	0.626542	0.13551
FBgn0080121	5	17	3	5	4.96117	17.1228	3.0018	5.003	0.0181432	0.704625	0.612046	ambiguous	conserved-expression	0.736966	1.0502
FBgn0244309	6	18	3	2	5.9534	18.13	3.0018	2.0012	0.0247781	0.829083	0.288974	ambiguous	dominant	0.584963	1.02163
FBgn0247099	28	56	23	21	27.7825	56.4044	23.0138	21.0126	0.00472935	0.895316	0.108028	ambiguous	conserved-expression	0.131245	0.890386
FBgn0012708	205	303	78	102	203.408	305.188	78.0469	102.061	3.52376e-05	0.213861	0.626213	ambiguous	dominant	0.387023	0.198301
FBgn0070658	248	182	108	96	246.074	183.314	108.065	96.0577	0.00472045	0.656676	0.497006	ambiguous	conserved-expression	0.169925	0.254846
FBgn0248427	271	383	112	118	268.895	385.766	112.067	118.071	2.9687e-05	0.834509	0.130563	ambiguous	dominant	0.0752881	0.445394
FBgn0075384	55	32	11	16	54.5728	32.2311	11.0066	16.0096	0.0297582	0.570294	0.125227	ambiguous	dominant	0.540568	0.219161
FBgn0075962	235	356	122	148	233.175	358.571	122.073	148.089	1.79789e-06	0.281988	0.251663	ambiguous	dominant	0.278716	0.342131
FBgn0246352	360	289	182	149	357.204	291.087	182.109	149.09	0.0156964	0.228338	0.987572	ambiguous	conserved-expression	0.288626	0.00667057
FBgn0078552	12	30	5	6	11.9068	30.2167	5.003	6.0036	0.0105341	0.885502	0.480932	ambiguous	dominant	0.263034	1.08052
FBgn0247885	410	534	241	270	406.816	537.857	241.145	270.162	0.000118192	0.403728	0.287521	ambiguous	dominant	0.163926	0.23892
FBgn0078699	163	247	103	112	161.734	248.784	103.062	112.067	8.39082e-05	0.738634	0.122002	ambiguous	dominant	0.120854	0.500415
FBgn0244180	688	597	282	235	682.657	601.312	282.169	235.141	0.0324904	0.158372	0.758528	ambiguous	under-dominant	0.263034	0.0799875
FBgn0248192	100	58	59	42	99.2233	58.4189	59.0354	42.0252	0.00248505	0.262041	0.655766	ambiguous	dominant	0.490326	0.273919
FBgn0081893	31	13	16	13	30.7592	13.0939	16.0096	13.0078	0.0143746	0.785313	0.368321	ambiguous	dominant	0.29956	0.932566
XLOC_012297	32	60	25	20	31.7515	60.4333	25.015	20.012	0.00722974	0.698763	0.0676282	ambiguous	conserved-expression	0.321928	0.606593
FBgn0074466	174	248	103	106	172.649	249.791	103.062	106.064	0.000708642	0.915506	0.13064	ambiguous	conserved-expression	0.0414199	0.491464
FBgn0078602	76	47	35	21	75.4097	47.3394	35.021	21.0126	0.0209259	0.201139	0.942489	ambiguous	conserved-expression	0.736966	0.0652577
FBgn0263170	927	814	319	322	919.8	819.879	319.192	322.193	0.0224004	0.940818	0.348173	ambiguous	under-dominant	0.0135043	0.152406
FBgn0248351	287	203	101	87	284.771	204.466	101.061	87.0523	0.000607285	0.561383	0.48675	ambiguous	dominant	0.215268	0.262672
FBgn0073173	443	522	249	247	439.559	525.77	249.15	247.148	0.0176441	0.998184	0.219127	ambiguous	conserved-expression	0.0116347	0.246739
FBgn0077567	84	33	42	24	83.3476	33.2383	42.0252	24.0144	8.39174e-06	0.11292	0.466338	ambiguous	dominant	0.807355	0.518938
FBgn0076151	189	295	67	89	187.532	297.131	67.0403	89.0535	4.04663e-06	0.22352	0.543701	ambiguous	dominant	0.409644	0.254315
FBgn0079383	94	58	31	15	93.2699	58.4189	31.0186	15.009	0.00923286	0.083585	0.654656	ambiguous	dominant	1.04731	0.372329
FBgn0080419	733	897	373	430	727.307	903.478	373.224	430.258	9.29845e-05	0.143834	0.584403	ambiguous	dominant	0.205161	0.107764
FBgn0080269	1518	1641	716	795	1506.21	1652.85	716.43	795.478	0.0344022	0.132633	0.921721	ambiguous	dominant	0.150995	0.0169611
FBgn0081088	1004	776	468	436	996.202	781.604	468.281	436.262	7.20458e-07	0.558619	0.110189	ambiguous	dominant	0.10218	0.24782
FBgn0247706	298	367	125	152	295.686	369.651	125.075	152.091	0.0129842	0.266763	0.919009	ambiguous	dominant	0.282143	0.0399552
FBgn0075869	69	38	41	32	68.4641	38.2744	41.0246	32.0192	0.00707203	0.543363	0.475563	ambiguous	dominant	0.357552	0.481414
FBgn0071039	34	16	9	15	33.7359	16.1156	9.00541	15.009	0.0229898	0.444356	0.0527142	ambiguous	conserved-expression	0.736966	0.328867
FBgn0078423	48	78	11	24	47.6272	78.5633	11.0066	24.0144	0.0146607	0.107934	0.674769	ambiguous	dominant	1.12553	0.40346
FBgn0072307	87	150	25	38	86.3243	151.083	25.015	38.0228	0.000109171	0.266408	0.782282	ambiguous	dominant	0.604071	0.203435
FBgn0247853	347	261	179	159	344.305	262.885	179.108	159.096	0.00185485	0.538224	0.458954	ambiguous	dominant	0.170933	0.218322
FBgn0247888	83	36	28	28	82.3554	36.26	28.0168	28.0168	5.5861e-05	0.998184	0.0518405	ambiguous	conserved-expression	0	1.18348
FBgn0249308	64	28	34	26	63.5029	28.2022	34.0204	26.0156	0.00051233	0.549177	0.258441	ambiguous	dominant	0.387023	0.783991
FBgn0246423	1654	1341	561	503	1641.15	1350.69	561.337	503.302	1.74238e-07	0.249329	0.417537	ambiguous	under-dominant	0.157442	0.123577
FBgn0075512	19	42	6	4	18.8524	42.3033	6.0036	4.0024	0.00656956	0.744527	0.200059	ambiguous	dominant	0.584963	0.581058
FBgn0243537	75	105	51	50	74.4175	105.758	51.0306	50.03	0.0434704	0.981923	0.29241	ambiguous	conserved-expression	0.0285692	0.478488
FBgn0080561	17	36	4	6	16.868	36.26	4.0024	6.0036	0.0172422	0.73894	0.77164	ambiguous	dominant	0.584963	0.51913
FBgn0074622	610	488	284	281	605.262	491.524	284.171	281.169	0.00106945	0.984319	0.153785	ambiguous	conserved-expression	0.0153208	0.284977
FBgn0244237	127	172	58	80	126.014	173.242	58.0348	80.0481	0.0170517	0.18937	0.993421	ambiguous	conserved-expression	0.463947	0.00473631
FBgn0072148	64	94	34	46	63.5029	94.6789	34.0204	46.0276	0.0305015	0.387821	0.847838	ambiguous	conserved-expression	0.436099	0.14012
FBgn0245361	1093	963	496	480	1084.51	969.955	496.298	480.288	0.0153795	0.829227	0.50742	ambiguous	dominant	0.0473057	0.113749
FBgn0248260	304	368	99	107	301.639	370.658	99.0595	107.064	0.0223418	0.76368	0.613969	ambiguous	under-dominant	0.11211	0.185155
FBgn0243753	498	576	294	322	494.132	580.16	294.177	322.193	0.0263364	0.472615	0.6776	ambiguous	dominant	0.131245	0.100309
FBgn0247465	122	171	43	55	121.052	172.235	43.0258	55.033	0.00826019	0.447482	0.798111	ambiguous	dominant	0.355095	0.153651
FBgn0071003	455	385	233	205	451.466	387.781	233.14	205.123	0.0409644	0.421898	0.913356	ambiguous	conserved-expression	0.184706	0.0346713
FBgn0080363	390	302	194	188	386.971	304.181	194.117	188.113	0.00302906	0.904499	0.237242	ambiguous	dominant	0.045324	0.301971
FBgn0078084	223	279	124	140	221.268	281.015	124.075	140.084	0.021325	0.549177	0.631837	ambiguous	conserved-expression	0.175087	0.169765
FBgn0249427	303	376	151	181	300.647	378.716	151.091	181.109	0.00908267	0.255737	0.838564	ambiguous	conserved-expression	0.261441	0.0716044
FBgn0078499	719	555	353	310	713.416	559.008	353.212	310.186	3.03479e-05	0.284026	0.423079	ambiguous	dominant	0.1874	0.164473
FBgn0070293	48	84	26	21	47.6272	84.6067	26.0156	21.0126	0.00370312	0.706019	0.0748874	ambiguous	dominant	0.308122	0.520863
XLOC_011350	59	33	22	25	58.5418	33.2383	22.0132	25.015	0.0158329	0.82558	0.151702	ambiguous	conserved-expression	0.184425	0.632194
FBgn0079134	246	300	94	120	244.089	302.167	94.0565	120.072	0.0338623	0.216888	0.920906	ambiguous	dominant	0.352302	0.0443668
FBgn0245276	15	42	10	17	14.8835	42.3033	10.006	17.0102	0.000736833	0.387186	0.5031	ambiguous	conserved-expression	0.765535	0.741523
FBgn0249280	220	282	77	76	218.291	284.037	77.0463	76.0457	0.0103577	0.997096	0.289915	ambiguous	under-dominant	0.018859	0.360963
FBgn0070411	217	352	121	150	215.315	354.542	121.073	150.09	4.6812e-08	0.220877	0.15714	ambiguous	additive	0.309955	0.409556
FBgn0078214	660	476	273	256	654.874	479.438	273.164	256.154	4.50652e-07	0.719172	0.0686075	ambiguous	dominant	0.0927571	0.357117
FBgn0078034	229	284	142	147	227.221	286.051	142.085	147.088	0.025465	0.879669	0.356096	ambiguous	dominant	0.0499252	0.282249
FBgn0081108	5	18	4	7	4.96117	18.13	4.0024	7.00421	0.0116894	0.602899	0.562659	ambiguous	conserved-expression	0.807355	1.06227
FBgn0071371	224	275	92	117	222.26	276.986	92.0553	117.07	0.0365491	0.231678	0.948088	ambiguous	dominant	0.346803	0.0292392
FBgn0077055	552	397	156	149	547.713	399.867	156.094	149.09	3.66579e-06	0.865095	0.123556	ambiguous	under-dominant	0.0662337	0.387665
FBgn0080406	121	165	66	80	120.06	166.192	66.0397	80.0481	0.0171275	0.47124	0.696212	ambiguous	conserved-expression	0.277534	0.191556
FBgn0077715	129	170	72	80	127.998	171.228	72.0433	80.0481	0.0306551	0.724089	0.551415	ambiguous	conserved-expression	0.152003	0.267791
FBgn0073147	78	125	26	37	77.3942	125.903	26.0156	37.0222	0.00213854	0.369612	0.797035	ambiguous	dominant	0.509014	0.192999
FBgn0072847	29	77	13	23	28.7748	77.5561	13.0078	23.0138	7.5851e-06	0.254594	0.505877	ambiguous	dominant	0.823122	0.607314
FBgn0079147	1174	889	482	415	1164.88	895.421	482.29	415.249	5.87406e-09	0.12138	0.322507	ambiguous	dominant	0.215922	0.163625
FBgn0080403	3708	3369	1807	1687	3679.2	3393.33	1808.09	1688.01	0.000592226	0.190217	0.874232	ambiguous	conserved-expression	0.0991365	0.0175536
FBgn0071236	309	253	165	181	306.6	254.827	165.099	181.109	0.0443437	0.609859	0.124473	ambiguous	dominant	0.133524	0.133315
FBgn0076835	13	30	5	4	12.899	30.2167	5.003	4.0024	0.0178788	0.879669	0.311428	ambiguous	dominant	0.321928	0.906154
FBgn0249658	292	192	96	91	289.732	193.387	96.0577	91.0547	2.90447e-05	0.878353	0.125468	ambiguous	dominant	0.0771679	0.506063
FBgn0076303	9	92	2	0	8.9301	92.6644	2.0012	1	5.75407e-18	0.76763	0.0632691	ambiguous	dominant	1.00087	2.3744
FBgn0078834	716	806	376	358	710.439	811.821	376.226	358.215	0.0298894	0.756655	0.124473	ambiguous	conserved-expression	0.0707731	0.121678
FBgn0246139	4	22	3	9	3.96893	22.1589	3.0018	9.00541	0.000625961	0.227325	0.664246	ambiguous	conserved-expression	1.58496	0.8961
XLOC_012789	82	54	33	30	81.3631	54.39	33.0198	30.018	0.0361482	0.865095	0.51347	ambiguous	conserved-expression	0.137504	0.44353
FBgn0246740	71	145	25	30	70.4486	146.047	25.015	30.018	1.36143e-06	0.717875	0.194334	ambiguous	dominant	0.263034	0.788758
FBgn0071279	48	104	22	39	47.6272	104.751	22.0132	39.0234	1.48166e-05	0.113767	0.684158	ambiguous	dominant	0.825971	0.311137
FBgn0075587	50	29	28	28	49.6117	29.2094	28.0168	28.0168	0.0380685	0.998184	0.288038	ambiguous	dominant	0	0.764244
FBgn0071353	74	38	32	29	73.4253	38.2744	32.0192	29.0174	0.00192021	0.863606	0.214763	ambiguous	dominant	0.142019	0.797876
FBgn0074970	51	78	14	25	50.6039	78.5633	14.0084	25.015	0.0314619	0.225231	0.837887	ambiguous	dominant	0.836501	0.201894
FBgn0074001	101	69	43	26	100.216	69.4983	43.0258	26.0156	0.0322063	0.153221	0.789338	ambiguous	dominant	0.725825	0.197769
FBgn0081244	1009	1359	547	632	1001.16	1368.82	547.329	632.38	1.46622e-12	0.0575107	0.0679354	ambiguous	additive	0.208384	0.242866
FBgn0081167	409	500	225	213	405.823	503.611	225.135	213.128	0.0045541	0.791586	0.0713046	ambiguous	conserved-expression	0.0790716	0.232386
FBgn0082156	80	43	37	35	79.3787	43.3106	37.0222	35.021	0.00243772	0.923822	0.176682	ambiguous	dominant	0.0801703	0.793862
FBgn0081028	28	12	4	0	27.7825	12.0867	4.0024	1	0.0233598	0.378862	0.779141	ambiguous	dominant	2.00087	0.800105
FBgn0078544	107	147	68	60	106.169	148.062	68.0409	60.036	0.021881	0.722071	0.109006	ambiguous	conserved-expression	0.180572	0.299264
FBgn0078547	273	332	113	134	270.88	334.398	113.068	134.081	0.0269682	0.384552	0.886785	ambiguous	dominant	0.24591	0.0580028
FBgn0247777	318	227	162	124	315.53	228.639	162.097	124.075	0.000421781	0.112853	0.837245	ambiguous	dominant	0.385654	0.07905
FBgn0076892	43	72	28	36	42.666	72.52	28.0168	36.0216	0.0134419	0.549177	0.577396	ambiguous	conserved-expression	0.36257	0.402721
FBgn0079149	230	288	128	145	228.214	290.08	128.077	145.087	0.0187373	0.528679	0.633409	ambiguous	conserved-expression	0.179909	0.166157
XLOC_008759	19	6	5	6	18.8524	6.04333	5.003	6.0036	0.0178851	0.885502	0.19982	ambiguous	conserved-expression	0.263034	1.3783
FBgn0070620	3	182	1	0	2.9767	183.314	1.0006	1	1.93962e-49	0.998184	0.0775555	ambiguous	dominant	0.000866529	5.9436
FBgn0081479	6	18	1	3	5.9534	18.13	1.0006	3.0018	0.0247781	0.545334	0.994339	ambiguous	dominant	1.58496	0.0216307
FBgn0075556	148	189	61	86	146.851	190.365	61.0366	86.0517	0.0422307	0.139117	0.813557	ambiguous	dominant	0.495527	0.121108
FBgn0080949	58	32	18	19	57.5495	32.2311	18.0108	19.0114	0.0145337	0.938974	0.248743	ambiguous	conserved-expression	0.0780025	0.758348
FBgn0247093	142	182	87	86	140.897	183.314	87.0523	86.0517	0.0434652	0.998184	0.305235	ambiguous	conserved-expression	0.0166787	0.363
FBgn0081554	779	978	509	575	772.95	985.063	509.306	575.345	4.30625e-06	0.143162	0.267683	ambiguous	dominant	0.175896	0.173946
FBgn0077482	30	13	15	8	29.767	13.0939	15.009	8.00481	0.019989	0.347331	0.847154	ambiguous	conserved-expression	0.906891	0.27793
FBgn0074182	541	384	170	160	536.798	386.773	170.102	160.096	1.90183e-06	0.800208	0.114774	ambiguous	dominant	0.0874628	0.385429
FBgn0078962	32	15	6	10	31.7515	16.3691	6.0036	10.841	0.046033	0.467759	0.102819	ambiguous	conserved-expression	0.8526	0.103245
FBgn0073744	653	514	227	217	647.928	517.712	227.136	217.13	0.000259568	0.835444	0.248765	ambiguous	under-dominant	0.0649973	0.258687
FBgn0075333	740	556	324	309	734.253	560.016	324.195	309.186	2.76257e-06	0.787088	0.0747543	ambiguous	dominant	0.068387	0.322423
FBgn0078585	540	419	198	200	535.806	422.026	198.119	200.12	0.000457436	0.95254	0.113104	ambiguous	dominant	0.0144996	0.329879
FBgn0071965	46	85	30	35	45.6427	85.6139	30.018	35.021	0.00148883	0.741235	0.275425	ambiguous	conserved-expression	0.222392	0.685067
FBgn0072738	455	596	208	253	451.466	600.304	208.125	253.152	3.09511e-05	0.126446	0.621125	ambiguous	dominant	0.282554	0.128523
FBgn0077734	47	91	25	29	46.635	91.6572	25.015	29.0174	0.000432395	0.77744	0.247768	ambiguous	dominant	0.214125	0.760712
FBgn0078325	1217	1041	605	615	1207.55	1048.52	605.363	615.369	0.00119056	0.86431	0.0873557	ambiguous	dominant	0.0236513	0.180077
FBgn0074669	219	163	105	93	217.299	164.177	105.063	93.0559	0.0118697	0.651188	0.56487	ambiguous	conserved-expression	0.175087	0.229341
FBgn0247368	389	537	210	245	385.979	540.878	210.126	245.147	2.92015e-06	0.255403	0.253924	ambiguous	additive	0.222392	0.26439
FBgn0071227	27	68	9	16	26.7903	68.4911	9.00541	16.0096	6.18222e-05	0.364556	0.639119	ambiguous	dominant	0.830075	0.524131
FBgn0244310	37	18	17	10	36.7126	18.13	17.0102	10.006	0.0222983	0.397752	0.844474	ambiguous	conserved-expression	0.765535	0.252363
FBgn0245266	280	220	96	105	277.825	221.589	96.0577	105.063	0.0199462	0.728295	0.158597	ambiguous	dominant	0.129283	0.19701
FBgn0080976	66	98	38	37	65.4874	98.7078	38.0228	37.0222	0.0229454	0.972525	0.266281	ambiguous	conserved-expression	0.0384741	0.553472
FBgn0246100	1018	810	442	376	1010.09	815.85	442.266	376.226	1.0145e-05	0.105972	0.714148	ambiguous	dominant	0.233314	0.0747993
FBgn0077506	52	21	9	12	51.5961	21.1517	9.00541	12.0072	0.0007754	0.728295	0.0700048	ambiguous	dominant	0.415037	0.871454
FBgn0081539	436	521	235	223	432.614	524.763	235.141	223.134	0.0100993	0.799273	0.097646	ambiguous	conserved-expression	0.075617	0.202969
FBgn0246742	47	13	15	11	46.635	13.0939	15.009	11.0066	2.72658e-05	0.674776	0.156046	ambiguous	dominant	0.447459	1.38506
FBgn0244828	23	10	11	3	22.8214	10.0722	11.0066	3.0018	0.0449001	0.116624	0.692977	ambiguous	conserved-expression	1.87447	0.694466
FBgn0075110	660	528	378	366	654.874	531.813	378.227	366.22	0.000640059	0.858393	0.161293	ambiguous	over-dominant	0.0465426	0.253755
FBgn0246824	84	122	50	63	83.3476	122.881	50.03	63.0379	0.0154498	0.441074	0.688747	ambiguous	conserved-expression	0.333424	0.226627
FBgn0246910	162	112	62	47	160.742	112.809	62.0373	47.0282	0.00731806	0.365823	0.852761	ambiguous	dominant	0.399607	0.111257
FBgn0246763	549	440	287	290	544.736	443.178	287.172	290.174	0.00217481	0.938974	0.116694	ambiguous	dominant	0.0150022	0.28267
FBgn0076756	616	508	290	278	611.216	511.669	290.174	278.167	0.00487635	0.826701	0.361914	ambiguous	conserved-expression	0.060968	0.195503
FBgn0247158	39	13	19	12	38.6971	13.0939	19.0114	12.0072	0.000757389	0.43969	0.37765	ambiguous	dominant	0.662965	0.900367
FBgn0245102	1146	1010	514	506	1137.1	1017.29	514.309	506.304	0.0131321	0.938617	0.387664	ambiguous	dominant	0.022631	0.13799
FBgn0079677	26	12	8	4	25.7981	12.0867	8.00481	4.0024	0.0446301	0.482259	0.960191	ambiguous	conserved-expression	1	0.0938465
FBgn0073480	139	205	66	96	137.92	206.481	66.0397	96.0577	0.00084543	0.0801182	0.938101	ambiguous	dominant	0.540568	0.0416014
FBgn0073474	50	90	30	29	49.6117	90.65	30.018	29.0174	0.00163507	0.966237	0.125468	ambiguous	dominant	0.0489096	0.820718
FBgn0246095	18	2	4	1	17.8602	2.01444	4.0024	1.0006	0.000419871	0.378862	0.736738	ambiguous	dominant	2	1.14829
FBgn0077771	31	55	17	13	30.7592	55.3972	17.0102	13.0078	0.0184705	0.704609	0.13148	ambiguous	dominant	0.387023	0.461771
XLOC_005931	62	30	23	11	61.5185	30.2167	23.0138	11.0066	0.00232138	0.145912	0.97405	ambiguous	dominant	1.06413	0.0384553
FBgn0249677	58	26	18	19	57.5495	26.1878	18.0108	19.0114	0.0013298	0.938974	0.112166	ambiguous	conserved-expression	0.0780025	1.05791
FBgn0078704	2120	2276	960	1038	2103.53	2292.44	960.577	1038.62	0.0209105	0.206682	0.939101	ambiguous	dominant	0.1127	0.0113669
FBgn0247383	388	297	165	157	384.987	299.145	165.099	157.094	0.00195973	0.844335	0.289167	ambiguous	dominant	0.0717015	0.292262
FBgn0078875	33	111	14	18	32.7437	111.802	14.0084	18.0108	1.4456e-10	0.704348	0.0672293	ambiguous	dominant	0.36257	1.40908
FBgn0246346	14	35	7	13	13.8913	35.2528	7.00421	13.0078	0.00541091	0.388906	0.749183	ambiguous	conserved-expression	0.893085	0.450474
FBgn0247132	37	65	14	21	36.7126	65.4694	14.0084	21.0126	0.0111226	0.465277	0.809293	ambiguous	dominant	0.584963	0.249583
FBgn0071296	785	631	339	327	778.903	635.557	339.204	327.196	0.00024933	0.843781	0.191233	ambiguous	dominant	0.0519946	0.241427
FBgn0079470	231	320	123	140	229.206	322.311	123.074	140.084	0.000338971	0.518461	0.325883	ambiguous	dominant	0.186769	0.305041
FBgn0079224	52	80	34	31	51.5961	80.5778	34.0204	31.0186	0.0270565	0.868933	0.195486	ambiguous	conserved-expression	0.133267	0.509853
FBgn0076698	797	883	380	446	790.81	889.377	380.228	446.268	0.0481501	0.0848872	0.772241	ambiguous	conserved-expression	0.231044	0.0615799
FBgn0245272	50	78	28	22	49.6117	78.5633	28.0168	22.0132	0.0245998	0.645602	0.112479	ambiguous	dominant	0.347923	0.315253
FBgn0244069	693	793	292	317	687.618	798.727	292.175	317.19	0.0143746	0.527508	0.669596	ambiguous	dominant	0.118514	0.0975818
FBgn0072862	50	96	21	35	49.6117	96.6933	21.0126	35.021	0.000340677	0.19051	0.785199	ambiguous	dominant	0.736966	0.225771
FBgn0246392	251	177	129	121	249.051	178.278	129.078	121.073	0.0012955	0.818356	0.220065	ambiguous	dominant	0.092364	0.389943
FBgn0075597	366	288	164	156	363.157	290.08	164.099	156.094	0.00748503	0.843781	0.378386	ambiguous	conserved-expression	0.0721498	0.251994
FBgn0081330	80	51	39	32	79.3787	51.3683	39.0234	32.0192	0.025888	0.6543	0.619172	ambiguous	conserved-expression	0.285402	0.34247
FBgn0079676	331	409	171	214	328.429	411.954	171.103	214.129	0.0074261	0.107934	0.992659	ambiguous	conserved-expression	0.323614	0.00328588
FBgn0080738	47	76	26	42	46.635	76.5489	26.0156	42.0252	0.0171593	0.169875	0.979386	ambiguous	conserved-expression	0.691878	0.0230917
FBgn0261651	591	699	301	321	586.41	704.048	301.181	321.193	0.00443344	0.634487	0.410998	ambiguous	conserved-expression	0.0928098	0.170955
FBgn0263356	1275	1430	533	523	1265.1	1440.33	533.32	523.314	0.00403168	0.917327	0.120582	ambiguous	under-dominant	0.0273246	0.159824
FBgn0248102	14	30	1	5	13.8913	30.2167	1.0006	5.003	0.0287104	0.248072	0.626018	ambiguous	dominant	2.32193	1.20076
FBgn0074451	167	209	131	123	165.703	210.509	131.079	123.074	0.0489691	0.820077	0.166981	ambiguous	dominant	0.0909085	0.254377
FBgn0244142	366	521	224	254	363.157	524.763	224.135	254.153	5.29257e-07	0.364295	0.105421	ambiguous	dominant	0.18133	0.349741
FBgn0079499	3	17	2	4	2.9767	17.1228	2.0012	4.0024	0.00262784	0.64743	0.531011	ambiguous	dominant	1	1.52413
FBgn0077603	163	102	71	63	161.734	102.737	71.0427	63.0379	0.000650789	0.728295	0.265179	ambiguous	conserved-expression	0.172467	0.482205
FBgn0076092	72	104	35	29	71.4408	104.751	35.021	29.0174	0.0284848	0.698017	0.144048	ambiguous	dominant	0.271302	0.280843
FBgn0075317	131	76	58	56	129.983	76.5489	58.0348	56.0336	0.000469411	0.945176	0.110635	ambiguous	dominant	0.0506261	0.713239
XLOC_012930	554	407	291	240	549.697	409.939	291.175	240.144	1.44832e-05	0.122867	0.553061	ambiguous	dominant	0.277985	0.145242
FBgn0081687	292	409	109	145	289.732	411.954	109.065	145.087	2.47451e-05	0.0967952	0.798842	ambiguous	dominant	0.411725	0.0960384
FBgn0081573	149	86	67	57	147.843	86.6211	67.0403	57.0342	0.000156293	0.624547	0.230948	ambiguous	dominant	0.233199	0.538074
FBgn0244486	111	177	49	49	110.138	178.278	49.0294	49.0294	0.000247633	0.998184	0.121879	ambiguous	dominant	0	0.69482
FBgn0077477	172	235	83	89	170.664	236.697	83.0499	89.0535	0.00362355	0.811442	0.323687	ambiguous	dominant	0.100694	0.371189
FBgn0081091	849	1093	385	426	842.406	1100.89	385.231	426.256	6.93117e-08	0.327211	0.135004	ambiguous	dominant	0.145995	0.240093
FBgn0076770	42	67	16	14	41.6738	67.4839	16.0096	14.0084	0.0302505	0.869493	0.293791	ambiguous	dominant	0.192645	0.502757
FBgn0249919	79	119	46	65	78.3864	119.859	46.0276	65.0391	0.00895447	0.211014	0.858529	ambiguous	dominant	0.498806	0.113862
FBgn0081186	58	31	39	32	57.5495	31.2239	39.0234	32.0192	0.0102843	0.6543	0.380837	ambiguous	dominant	0.285402	0.596752
FBgn0081830	64	37	19	9	63.5029	37.2672	19.0114	9.00541	0.0170509	0.190217	0.785908	ambiguous	dominant	1.078	0.309087
FBgn0075213	1273	1032	602	580	1263.11	1039.45	602.362	580.348	5.38556e-06	0.775913	0.0903402	ambiguous	dominant	0.0537106	0.227448
FBgn0248068	404	318	160	140	400.862	320.297	160.096	140.084	0.00481488	0.50286	0.691181	ambiguous	dominant	0.192645	0.131053
FBgn0081295	632	770	264	292	627.091	775.561	264.159	292.175	0.00042737	0.445249	0.458954	ambiguous	dominant	0.14543	0.161134
FBgn0077393	208	144	96	76	206.385	145.04	96.0577	76.0457	0.00220034	0.329767	0.702502	ambiguous	conserved-expression	0.337035	0.171849
FBgn0078164	459	534	214	245	455.435	537.857	214.129	245.147	0.0266183	0.33073	0.882557	ambiguous	dominant	0.195171	0.0448054
FBgn0074490	48	131	28	38	47.6272	131.946	28.0168	38.0228	1.33337e-09	0.43969	0.0672293	ambiguous	dominant	0.440573	1.02952
FBgn0080850	31	31	18	10	30.7592	51.9807	18.0108	16.6577	0.0412609	0.923822	0.371623	ambiguous	conserved-expression	0.112672	0.644284
FBgn0072507	74	145	33	55	73.4253	146.047	33.0198	55.033	4.51653e-06	0.0821597	0.685247	ambiguous	dominant	0.736966	0.255121
FBgn0071504	236	291	123	148	234.167	293.102	123.074	148.089	0.0275473	0.306906	0.887629	ambiguous	conserved-expression	0.266939	0.0569242
FBgn0079322	74	128	39	52	73.4253	128.924	39.0234	52.0312	0.000352917	0.378347	0.480932	ambiguous	dominant	0.415037	0.39714
FBgn0248827	47	27	12	12	46.635	27.195	12.0072	12.0072	0.0413455	0.998184	0.445244	ambiguous	dominant	0	0.778071
FBgn0077578	65	39	26	20	64.4952	39.2817	26.0156	20.012	0.0243825	0.626376	0.696101	ambiguous	conserved-expression	0.378512	0.336823
FBgn0249922	17	34	3	5	16.868	34.2456	3.0018	5.003	0.031304	0.704625	0.892888	ambiguous	dominant	0.736966	0.284665
FBgn0249744	186	127	102	87	184.555	127.917	102.061	87.0523	0.00279091	0.53106	0.456312	ambiguous	dominant	0.229482	0.299362
FBgn0250551	22	40	4	10	21.8291	40.2889	4.0024	10.006	0.0395965	0.275166	0.786758	ambiguous	dominant	1.32193	0.437801
FBgn0078892	69	39	45	30	68.4641	39.2817	45.027	30.018	0.00978586	0.246954	0.781157	ambiguous	dominant	0.584963	0.216529
FBgn0247260	327	430	160	162	324.46	433.106	160.096	162.097	0.000389085	0.949859	0.115629	ambiguous	dominant	0.0179219	0.398755
FBgn0070617	118	76	38	44	117.084	76.5489	38.0228	44.0264	0.00715996	0.722015	0.097646	ambiguous	dominant	0.211504	0.401581
FBgn0073310	38	64	15	19	37.7049	64.4622	15.009	19.0114	0.0191568	0.713048	0.647032	ambiguous	dominant	0.341037	0.432666
FBgn0077402	90	126	32	48	89.301	126.91	32.0192	48.0288	0.0257399	0.21576	0.913552	ambiguous	dominant	0.584963	0.0779049
FBgn0250018	612	477	299	277	607.247	480.445	299.18	277.166	0.000234062	0.630654	0.277809	ambiguous	dominant	0.11026	0.227652
FBgn0073195	33	60	15	32	32.7437	60.4333	15.009	32.0192	0.0102759	0.0612046	0.832735	ambiguous	conserved-expression	1.09311	0.208982
FBgn0073660	542	772	274	310	537.79	777.576	274.165	310.186	6.26091e-10	0.311823	0.0545104	ambiguous	dominant	0.178092	0.353846
FBgn0249220	90	51	30	18	89.301	51.3683	30.018	18.0108	0.00295073	0.244293	0.948128	ambiguous	dominant	0.736966	0.0608314
FBgn0248981	20	28	5	1	19.8447	43.5026	5.003	1.54345	0.00717085	0.379947	0.13635	ambiguous	under-dominant	1.69664	0.564288
FBgn0081335	140	198	46	70	138.913	199.43	46.0276	70.0421	0.0033277	0.10358	0.886785	ambiguous	dominant	0.605721	0.0840167
FBgn0076640	202	146	86	70	200.431	147.054	86.0517	70.0421	0.00795222	0.438114	0.75623	ambiguous	dominant	0.296982	0.149774
FBgn0081341	314	399	181	188	311.561	401.882	181.109	188.113	0.00280384	0.844071	0.221681	ambiguous	conserved-expression	0.054743	0.312512
FBgn0074954	485	571	150	149	481.233	575.124	150.09	149.09	0.0131918	0.998184	0.322893	ambiguous	under-dominant	0.00965017	0.247487
FBgn0248101	23	46	8	19	22.8214	46.3322	8.00481	19.0114	0.0111632	0.123501	0.862413	ambiguous	conserved-expression	1.24793	0.226297
FBgn0243798	94	54	36	32	93.2699	54.39	36.0216	32.0192	0.00293782	0.820077	0.319033	ambiguous	conserved-expression	0.169925	0.608146
FBgn0075749	90	134	55	56	89.301	134.968	55.033	56.0336	0.0066881	0.963832	0.219841	ambiguous	conserved-expression	0.0259952	0.569872
FBgn0071982	252	178	90	76	250.043	179.23	90.0541	76.0222	0.00132158	0.531301	0.572066	ambiguous	dominant	0.244371	0.23599
FBgn0075914	110	78	55	50	109.146	78.5633	55.033	50.03	0.04319	0.820637	0.537386	ambiguous	conserved-expression	0.137504	0.336823
FBgn0082107	2127	1746	937	895	2110.48	1758.61	937.563	895.538	2.12104e-08	0.617299	0.0600418	ambiguous	dominant	0.0661614	0.196974
FBgn0246665	18	54	14	15	17.8602	54.39	14.0084	15.009	4.81936e-05	0.930913	0.0797587	ambiguous	dominant	0.0995357	1.50706
FBgn0070592	74	104	50	42	73.4253	104.751	50.03	42.0252	0.0422424	0.654047	0.119398	ambiguous	conserved-expression	0.251539	0.261078
FBgn0076954	644	524	301	269	638.998	527.784	301.181	269.162	0.00193679	0.422169	0.632564	ambiguous	conserved-expression	0.162157	0.113706
FBgn0081818	76	161	27	35	75.4097	162.163	27.0162	35.021	9.91774e-08	0.543507	0.208878	ambiguous	dominant	0.374396	0.730225
FBgn0072638	103	64	55	60	102.2	64.4622	55.033	60.036	0.0069854	0.809647	0.0833533	ambiguous	dominant	0.125531	0.539339
FBgn0081206	30	55	16	17	29.767	55.3972	16.0096	17.0102	0.0131918	0.934999	0.348503	ambiguous	dominant	0.0874628	0.808637
FBgn0072516	86	117	46	51	85.3321	117.845	46.0276	51.0306	0.0497055	0.791586	0.574019	ambiguous	conserved-expression	0.148863	0.316867
FBgn0077291	171	241	73	92	169.672	242.741	73.0439	92.0553	0.00123083	0.324765	0.67997	ambiguous	dominant	0.333737	0.18293
FBgn0250168	494	678	207	257	490.163	682.897	207.124	257.154	1.99749e-07	0.0831971	0.493449	ambiguous	dominant	0.312138	0.166267
FBgn0070389	80	115	56	52	79.3787	115.831	56.0336	52.0312	0.0223644	0.865095	0.162005	ambiguous	conserved-expression	0.106915	0.438277
FBgn0248672	251	379	150	167	249.051	381.737	150.09	167.1	9.68412e-07	0.559926	0.0744818	ambiguous	additive	0.154886	0.461256
FBgn0079502	560	462	332	298	555.651	465.337	332.199	298.179	0.00767492	0.419409	0.678964	ambiguous	dominant	0.155871	0.100032
FBgn0081067	327	231	189	157	324.46	232.668	189.114	157.094	0.000224001	0.258777	0.481056	ambiguous	dominant	0.267622	0.212145
FBgn0070424	365	280	211	210	362.165	282.022	211.127	210.126	0.00297972	0.998184	0.142745	ambiguous	dominant	0.00685367	0.353985
FBgn0248071	495	340	195	178	491.156	343.689	195.117	178.748	8.44187e-07	0.659278	0.0991744	ambiguous	dominant	0.126412	0.388666
FBgn0249523	197	149	89	65	195.47	150.076	89.0535	65.0391	0.024912	0.187179	0.890776	ambiguous	conserved-expression	0.453366	0.072113
FBgn0250575	357	281	82	92	354.227	283.029	82.0493	92.0553	0.00840421	0.668665	0.134927	ambiguous	under-dominant	0.16601	0.157713
FBgn0247360	4	18	4	8	3.96893	18.13	4.0024	8.00481	0.00469842	0.477111	0.515997	ambiguous	conserved-expression	1	1.19156
FBgn0078737	315	380	183	186	312.554	382.744	183.11	186.112	0.022414	0.930913	0.309575	ambiguous	conserved-expression	0.023459	0.268819
FBgn0070885	6	25	3	5	5.9534	25.1806	3.0018	5.003	0.00112751	0.704625	0.485209	ambiguous	dominant	0.736966	1.34356
FBgn0071398	331	455	176	184	328.429	458.286	176.106	184.111	2.38538e-05	0.821581	0.0808272	ambiguous	dominant	0.0641303	0.416536
FBgn0076470	178	249	72	97	176.618	250.798	72.0433	97.0583	0.00128085	0.173107	0.877965	ambiguous	dominant	0.429988	0.0759114
XLOC_009935	9	21	2	4	8.9301	21.1517	2.0012	4.0024	0.0486377	0.64743	0.925822	ambiguous	dominant	1	0.244023
FBgn0081780	455	309	163	147	451.466	311.232	163.098	147.088	9.83858e-07	0.62708	0.135027	ambiguous	dominant	0.149056	0.387573
FBgn0244290	97	58	45	31	96.2466	58.4189	45.027	31.0186	0.00486223	0.293166	0.802403	ambiguous	conserved-expression	0.537657	0.182644
FBgn0080112	234	159	98	95	232.183	160.148	98.0589	95.0571	0.000609272	0.936013	0.148812	ambiguous	conserved-expression	0.0448542	0.490997
FBgn0081054	176	219	91	97	174.633	220.582	91.0547	97.0583	0.0490583	0.820077	0.536258	ambiguous	conserved-expression	0.0921182	0.244868
FBgn0080104	82	132	48	52	81.3631	132.953	48.0288	52.0312	0.00142944	0.837775	0.223699	ambiguous	conserved-expression	0.115477	0.592996
FBgn0080275	314	196	91	77	311.561	197.416	91.0547	77.0463	1.1471e-06	0.53592	0.247514	ambiguous	dominant	0.241008	0.417272
FBgn0071473	108	151	47	46	107.161	152.091	47.0282	46.0276	0.0142853	0.978807	0.276519	ambiguous	dominant	0.0310269	0.474121
FBgn0247548	130	84	56	54	128.99	84.6067	56.0336	54.0324	0.00487015	0.943505	0.239372	ambiguous	conserved-expression	0.0524674	0.555952
XLOC_012761	96	58	40	29	95.2544	58.4189	40.024	29.0174	0.00606034	0.414954	0.740204	ambiguous	conserved-expression	0.463947	0.241404
FBgn0076841	887	765	319	299	880.111	770.525	319.192	299.18	0.0101041	0.688869	0.658219	ambiguous	under-dominant	0.0934109	0.0984327
FBgn0075929	170	277	84	101	168.68	279.001	84.0505	101.061	1.21437e-06	0.425539	0.184879	ambiguous	dominant	0.265894	0.460088
FBgn0073230	352	279	184	191	349.266	281.015	184.111	191.115	0.0112635	0.844798	0.14334	ambiguous	dominant	0.0538669	0.259813
FBgn0246694	254	401	148	176	252.027	403.896	148.089	176.106	2.83174e-08	0.291012	0.0958131	ambiguous	additive	0.249978	0.430426
FBgn0072880	47	18	18	11	46.635	18.13	18.0108	11.0066	0.000843658	0.42061	0.536992	ambiguous	conserved-expression	0.710493	0.65254
FBgn0076651	844	741	289	282	837.445	746.352	289.174	282.169	0.029858	0.915506	0.550758	ambiguous	under-dominant	0.0353743	0.130764
FBgn0079193	407	473	229	224	403.839	476.416	229.138	224.135	0.0394531	0.934999	0.244251	ambiguous	conserved-expression	0.0318489	0.206593
FBgn0078542	156	206	96	99	154.788	207.488	96.0577	99.0595	0.0157122	0.911856	0.298844	ambiguous	conserved-expression	0.0443941	0.378335
FBgn0244263	1136	961	536	538	1127.18	967.941	536.322	538.323	0.000767509	0.956122	0.114064	ambiguous	dominant	0.00537317	0.214351
FBgn0246306	5	17	6	7	4.96117	17.1228	6.0036	7.00421	0.0181432	0.895316	0.308122	ambiguous	conserved-expression	0.222392	1.56477
FBgn0072023	726	863	385	392	720.361	869.233	385.231	392.236	0.00102539	0.885502	0.145921	ambiguous	conserved-expression	0.0259952	0.245027
FBgn0078135	255	312	139	130	253.02	314.253	139.084	130.078	0.02749	0.799961	0.152043	ambiguous	conserved-expression	0.0965733	0.216106
FBgn0248132	566	385	258	223	561.604	387.781	258.155	223.134	4.43173e-08	0.310281	0.133041	ambiguous	additive	0.210327	0.323986
FBgn0082083	480	373	157	166	476.272	375.694	157.094	166.1	0.00108109	0.787088	0.0839862	ambiguous	dominant	0.0804187	0.261809
FBgn0071823	53	31	21	16	52.5884	31.2239	21.0126	16.0096	0.0348989	0.656307	0.710308	ambiguous	conserved-expression	0.392317	0.359776
FBgn0081913	564	749	368	432	559.62	754.409	368.221	432.26	8.00241e-07	0.0913837	0.275968	ambiguous	dominant	0.231326	0.199576
FBgn0079341	252	323	140	159	250.043	325.333	140.084	159.096	0.00579593	0.491126	0.539298	ambiguous	conserved-expression	0.1836	0.196141
FBgn0072818	277	216	97	81	274.849	217.56	97.0583	81.0487	0.016877	0.477855	0.869879	ambiguous	dominant	0.260063	0.0771611
FBgn0077590	167	117	81	61	165.703	117.845	81.0487	61.0366	0.00859916	0.268592	0.882346	ambiguous	conserved-expression	0.409113	0.0825962
FBgn0248156	24	44	10	17	23.8136	44.3178	10.006	17.0102	0.0280508	0.387186	0.919902	ambiguous	conserved-expression	0.765535	0.130565
FBgn0248653	2070	2262	1001	1076	2053.92	2278.34	1001.6	1076.65	0.00421755	0.236603	0.72859	ambiguous	dominant	0.104236	0.0453628
FBgn0073091	255	205	57	70	253.02	206.481	57.0342	70.0421	0.0467718	0.474848	0.123366	ambiguous	under-dominant	0.296393	0.00315039
FBgn0078908	163	247	103	112	161.734	248.784	103.062	112.067	8.39082e-05	0.738634	0.122002	ambiguous	dominant	0.120854	0.500415
FBgn0247254	114	79	30	22	113.115	79.5706	30.018	22.0132	0.0276481	0.513959	0.94436	ambiguous	under-dominant	0.447459	0.0600196
FBgn0246364	33	16	10	12	32.7437	16.1156	10.006	12.0072	0.0310711	0.83095	0.213206	ambiguous	conserved-expression	0.263034	0.759729
FBgn0074822	30	12	12	8	29.767	12.0867	12.0072	8.00481	0.0118597	0.617299	0.582012	ambiguous	conserved-expression	0.584963	0.715335
FBgn0081389	999	879	315	323	991.241	885.348	315.189	323.194	0.0194863	0.860728	0.285414	ambiguous	under-dominant	0.0361823	0.126808
FBgn0074328	224	166	75	79	222.26	167.199	75.0451	79.0475	0.00970752	0.871384	0.195094	ambiguous	dominant	0.0749621	0.335723
FBgn0247494	225	264	138	124	223.253	281.007	138.083	131.12	0.0270349	0.855883	0.173518	ambiguous	conserved-expression	0.0746439	0.257284
FBgn0070596	180	132	73	79	178.602	132.953	73.0439	79.0475	0.0173836	0.798782	0.159016	ambiguous	conserved-expression	0.113956	0.311872
FBgn0077739	1192	1044	558	581	1182.74	1051.54	558.335	581.349	0.00748396	0.684259	0.0955768	ambiguous	conserved-expression	0.058273	0.111359
FBgn0078375	4	18	1	4	3.96893	18.13	1.0006	4.0024	0.00469842	0.375137	0.955377	ambiguous	dominant	2	0.191556
FBgn0070610	287	226	151	119	284.771	227.632	151.091	119.071	0.0194863	0.186414	0.959647	ambiguous	conserved-expression	0.343587	0.0204897
FBgn0081066	51	25	16	20	50.6039	25.1806	16.0096	20.012	0.00706697	0.722514	0.0836643	ambiguous	conserved-expression	0.321928	0.68501
FBgn0070969	272	380	125	149	269.887	382.744	125.075	149.09	5.64935e-05	0.334921	0.417738	ambiguous	dominant	0.253384	0.250639
FBgn0079841	39	18	8	8	38.6971	18.13	8.00481	8.00481	0.0122833	0.998184	0.361143	ambiguous	dominant	0	1.09385
FBgn0076313	1625	1757	621	706	1612.38	1769.69	621.373	706.424	0.0276694	0.0769626	0.752172	ambiguous	under-dominant	0.185075	0.0507697
FBgn0072661	61	98	28	24	60.5262	98.7078	28.0168	24.0144	0.00689369	0.787933	0.131242	ambiguous	dominant	0.222392	0.483211
FBgn0080907	212	153	102	85	210.353	154.105	102.061	85.0511	0.00619858	0.458568	0.664653	ambiguous	conserved-expression	0.263034	0.185867
FBgn0077741	33	13	7	10	32.7437	13.0939	7.00421	10.006	0.00719992	0.694408	0.0923578	ambiguous	conserved-expression	0.514573	0.807751
FBgn0076175	16	35	5	6	15.8757	35.2528	5.003	6.0036	0.0149647	0.885502	0.56595	ambiguous	dominant	0.263034	0.887879
FBgn0079088	1550	1252	745	655	1537.96	1261.04	745.448	655.394	2.72896e-07	0.0919777	0.482484	ambiguous	additive	0.185746	0.100657
FBgn0247274	95	53	31	20	94.2622	53.3828	31.0186	20.012	0.00169504	0.316638	0.828391	ambiguous	dominant	0.632268	0.188036
FBgn0071331	91	125	45	39	90.2932	125.903	45.027	39.0234	0.0360542	0.743133	0.17158	ambiguous	dominant	0.206451	0.273169
FBgn0080543	64	116	38	40	63.5029	116.838	38.0228	40.024	0.000263072	0.911856	0.124473	ambiguous	dominant	0.0740006	0.805611
FBgn0079433	1091	884	509	445	1082.53	890.384	509.306	445.267	2.66442e-05	0.161905	0.631837	ambiguous	dominant	0.19386	0.0880418
FBgn0070645	2122	1951	917	862	2105.52	1965.09	917.551	862.518	0.0293619	0.459414	0.945961	ambiguous	under-dominant	0.0892339	0.0103463
FBgn0080068	2066	1910	985	1033	2049.95	1923.79	985.592	1033.62	0.0475077	0.478989	0.123907	ambiguous	conserved-expression	0.0686446	0.0229923
FBgn0079875	315	388	173	222	312.554	390.802	173.104	222.133	0.0103631	0.0627402	0.912931	ambiguous	dominant	0.359788	0.0374521
FBgn0079883	3486	3760	1718	1787	3458.93	3787.16	1719.03	1788.07	0.00125253	0.419861	0.394035	ambiguous	dominant	0.0568096	0.0739812
FBgn0246228	152	250	77	106	150.819	251.806	77.0463	106.064	2.91034e-06	0.120001	0.484179	ambiguous	dominant	0.461134	0.278354
FBgn0078886	262	199	121	132	259.965	200.437	121.073	132.079	0.00998694	0.701103	0.0879525	ambiguous	dominant	0.125531	0.249637
FBgn0075617	24	43	10	21	23.8136	43.3106	10.006	21.0126	0.0364602	0.160934	0.865657	ambiguous	conserved-expression	1.07039	0.207456
XLOC_012992	7	18	6	8	6.94563	18.13	6.0036	8.00481	0.0471005	0.785313	0.534826	ambiguous	conserved-expression	0.415037	0.969163
FBgn0247277	73	106	50	52	72.433	106.766	50.03	52.0312	0.0248198	0.923333	0.328223	ambiguous	conserved-expression	0.0565835	0.503143
FBgn0071944	28	10	4	2	27.7825	10.0722	4.0024	2.0012	0.00756298	0.651925	0.852761	ambiguous	dominant	1	0.463796
FBgn0250143	134	98	57	44	132.959	98.7078	57.0342	44.0264	0.0408931	0.428151	0.932369	ambiguous	conserved-expression	0.373458	0.0562902
FBgn0012704	32	12	16	12	31.7515	12.0867	16.0096	12.0072	0.00578879	0.690654	0.353565	ambiguous	dominant	0.415037	0.978369
FBgn0082037	519	363	176	165	514.969	365.622	176.106	165.099	1.19349e-06	0.780698	0.0955768	ambiguous	dominant	0.0931094	0.401025
FBgn0080651	1054	824	512	485	1045.81	829.951	512.308	485.291	1.19984e-06	0.669142	0.08142	ambiguous	dominant	0.0781591	0.255369
FBgn0246638	155	242	87	125	153.796	203.171	87.0523	104.254	0.0234227	0.427261	0.736824	ambiguous	conserved-expression	0.260148	0.141529
FBgn0072437	1499	1357	634	628	1487.36	1366.8	634.381	628.377	0.0282974	0.974671	0.45897	ambiguous	dominant	0.0137183	0.108231
FBgn0081197	238	184	128	124	236.152	185.329	128.077	124.075	0.0224759	0.923822	0.359735	ambiguous	dominant	0.0458037	0.303821
FBgn0247848	240	171	94	102	238.136	172.235	94.0565	102.061	0.0023115	0.758008	0.0702942	ambiguous	conserved-expression	0.117836	0.349571
FBgn0245676	148	53	32	15	146.851	53.3828	32.0192	15.009	8.83172e-11	0.0650728	0.661059	ambiguous	dominant	1.09311	0.366793
XLOC_011501	272	181	133	99	269.887	189.653	133.08	103.051	0.000403232	0.18379	0.725833	ambiguous	conserved-expression	0.368932	0.14006
FBgn0075389	172	264	93	96	170.664	265.907	93.0559	96.0577	2.77861e-05	0.911188	0.068099	ambiguous	dominant	0.0458037	0.593956
FBgn0076639	1797	1644	750	782	1783.04	1655.87	750.451	782.47	0.0334574	0.608339	0.159398	ambiguous	dominant	0.060278	0.0464714
FBgn0071237	148	90	72	58	146.851	90.65	72.0433	58.0348	0.000609923	0.463588	0.415328	ambiguous	dominant	0.311944	0.384026
FBgn0075501	190	145	91	70	188.524	146.047	91.0547	70.0421	0.0336976	0.278515	0.986518	ambiguous	conserved-expression	0.378512	0.0101958
FBgn0249586	239	183	139	113	237.144	184.322	139.084	113.068	0.0175248	0.288377	0.879928	ambiguous	dominant	0.298762	0.0647741
FBgn0243763	52	24	12	10	51.5961	24.1733	12.0072	10.006	0.00339429	0.839584	0.434813	ambiguous	dominant	0.263034	0.830812
FBgn0079257	159	119	71	63	157.765	119.859	71.0427	63.0379	0.0382235	0.728295	0.652518	ambiguous	conserved-expression	0.172467	0.223967
FBgn0081625	342	436	178	198	339.344	439.149	178.107	198.119	0.00148753	0.524848	0.416275	ambiguous	conserved-expression	0.153623	0.218339
FBgn0078684	20	46	6	5	19.8447	46.3322	6.0036	5.003	0.002899	0.891235	0.267936	ambiguous	dominant	0.263034	0.96023
FBgn0070938	104	141	49	48	103.192	142.018	49.0294	48.0288	0.0316144	0.980534	0.322232	ambiguous	dominant	0.0297473	0.430995
FBgn0081862	86	53	34	38	85.3321	53.3828	34.0204	38.0228	0.0129195	0.809647	0.134927	ambiguous	conserved-expression	0.160465	0.516249
FBgn0072826	100	148	78	91	99.2233	149.069	78.0469	91.0547	0.00476872	0.54507	0.389381	ambiguous	dominant	0.222392	0.364835
FBgn0244308	98	148	32	36	97.2389	149.069	32.0192	36.0216	0.0030545	0.803405	0.455012	ambiguous	under-dominant	0.169925	0.446449
FBgn0072566	26	12	16	21	25.7981	12.0867	16.0096	21.0126	0.0446301	0.644212	0.093837	ambiguous	dominant	0.392317	0.701529
FBgn0075046	270	367	136	149	267.903	369.651	136.082	149.09	0.000273406	0.656694	0.247092	ambiguous	dominant	0.131706	0.332746
FBgn0076950	114	78	66	53	113.115	78.5633	66.0397	53.0318	0.0226075	0.478822	0.713057	ambiguous	dominant	0.316474	0.209383
FBgn0072938	6	17	8	8	5.9534	17.1228	8.00481	8.00481	0.0371979	0.998184	0.269648	ambiguous	conserved-expression	0	1.52413
FBgn0243559	71	100	35	24	70.4486	100.722	35.021	24.0144	0.0455454	0.364628	0.0588642	ambiguous	dominant	0.544321	0.0285807
FBgn0081259	142	186	57	73	140.897	187.343	57.0342	73.0439	0.0263576	0.359615	0.924623	ambiguous	dominant	0.356935	0.0541079
FBgn0248388	796	885	339	363	789.818	891.392	339.204	363.218	0.0406788	0.577685	0.731083	ambiguous	dominant	0.0986843	0.0758555
FBgn0245725	272	333	147	144	269.887	335.405	147.088	144.087	0.0219805	0.95509	0.227524	ambiguous	conserved-expression	0.0297473	0.283799
FBgn0243766	71	111	28	26	70.4486	111.802	28.0168	26.0156	0.00626735	0.90877	0.209833	ambiguous	dominant	0.106915	0.559384
FBgn0074365	12	37	8	9	11.9068	37.2672	8.00481	9.00541	0.000720339	0.910691	0.207014	ambiguous	dominant	0.169925	1.4762
FBgn0073346	477	549	195	213	473.295	552.965	195.117	213.128	0.0366851	0.593179	0.736738	ambiguous	dominant	0.127379	0.0970683
FBgn0071084	1611	1732	775	832	1598.49	1744.51	775.466	832.5	0.0424031	0.32439	0.884246	ambiguous	dominant	0.102387	0.0237259
FBgn0245614	79	122	23	39	78.3864	127.708	23.0138	40.5562	0.00191809	0.108933	0.888767	ambiguous	dominant	0.817422	0.113253
FBgn0074089	420	330	169	155	416.738	332.383	169.102	155.093	0.00369617	0.694697	0.490296	ambiguous	dominant	0.124755	0.201538
FBgn0071176	40	15	11	8	39.6893	15.1083	11.0066	8.00481	0.00183537	0.722514	0.434813	ambiguous	dominant	0.459432	0.933975
FBgn0074373	561	432	228	181	556.643	435.12	228.137	181.109	0.000226529	0.0995413	0.944688	ambiguous	dominant	0.333044	0.0222946
FBgn0073068	19	70	6	15	18.8524	70.5056	6.0036	15.009	1.18198e-07	0.161575	0.658987	ambiguous	dominant	1.32193	0.581058
FBgn0075774	26	52	13	22	25.7981	52.3756	13.0078	22.0132	0.00668219	0.311823	0.809926	ambiguous	conserved-expression	0.758992	0.262639
FBgn0080390	476	586	182	224	472.303	590.232	182.109	224.135	0.00138561	0.129764	0.944781	ambiguous	dominant	0.29956	0.0220095
FBgn0247750	150	201	101	121	148.835	202.452	101.061	121.073	0.0121598	0.38232	0.652518	ambiguous	dominant	0.260652	0.183212
FBgn0249573	52	92	29	24	51.5961	92.6644	29.0174	24.0144	0.00191809	0.726228	0.0626077	ambiguous	dominant	0.273018	0.571734
FBgn0073927	30	8	12	5	29.767	8.05778	12.0072	5.003	0.000759557	0.247954	0.697524	ambiguous	conserved-expression	1.26303	0.622225
FBgn0077375	378	279	170	161	375.064	281.015	170.102	161.097	0.000499323	0.825141	0.205609	ambiguous	conserved-expression	0.0784741	0.338016
FBgn0078495	193	124	72	47	191.501	124.896	72.0433	47.0282	0.000415684	0.10036	0.998314	ambiguous	dominant	0.615336	0.00129385
FBgn0247860	861	693	418	397	854.313	698.005	418.251	397.239	0.000130098	0.726064	0.203891	ambiguous	dominant	0.0743639	0.217163
FBgn0070580	1353	1226	692	632	1342.49	1234.85	692.416	632.38	0.0403822	0.302257	0.955377	ambiguous	conserved-expression	0.130847	0.0102753
FBgn0078641	30	51	11	13	29.767	51.3683	11.0066	13.0078	0.0353255	0.83916	0.615065	ambiguous	dominant	0.241008	0.546157
FBgn0248953	397	326	209	181	393.917	328.354	209.126	181.109	0.023198	0.382839	0.870613	ambiguous	dominant	0.207513	0.0551231
FBgn0077818	18	35	13	13	17.8602	35.2528	13.0078	13.0078	0.0350728	0.998184	0.32884	ambiguous	conserved-expression	0	0.980989
FBgn0244083	4	16	2	3	3.96893	16.1156	2.0012	3.0018	0.0122715	0.825141	0.561334	ambiguous	dominant	0.584963	1.43667
FBgn0248619	1944	1600	702	662	1928.9	1611.56	702.422	662.398	1.39327e-07	0.556572	0.155844	ambiguous	under-dominant	0.0846398	0.174686
FBgn0072624	288	196	67	70	285.763	197.416	67.0403	70.0421	0.000135076	0.896528	0.103566	ambiguous	under-dominant	0.0631938	0.470391
FBgn0075895	406	316	155	146	402.847	318.282	155.093	146.088	0.00300876	0.813402	0.378186	ambiguous	dominant	0.0862998	0.253625
FBgn0246310	964	1269	456	526	956.513	1278.17	456.274	526.316	2.48683e-10	0.0954948	0.152788	ambiguous	dominant	0.206029	0.212189
FBgn0073418	115	190	56	77	114.107	191.372	56.0336	77.0463	4.62525e-05	0.2051	0.547248	ambiguous	dominant	0.459432	0.286565
FBgn0246107	84	122	45	59	83.3476	122.881	45.027	59.0354	0.0154498	0.373837	0.783321	ambiguous	conserved-expression	0.39079	0.169261
FBgn0250625	30	10	7	1	29.767	10.0722	7.00421	1.0006	0.00345488	0.106289	0.601226	ambiguous	dominant	2.80735	1.24402
FBgn0076176	1335	1569	535	595	1324.63	1580.33	535.321	595.357	2.32883e-05	0.202567	0.514619	ambiguous	under-dominant	0.153351	0.101286
FBgn0079637	9	27	3	6	8.9301	27.195	3.0018	6.0036	0.00514448	0.549177	0.765835	ambiguous	dominant	1	0.606593
FBgn0080721	112	80	46	48	111.13	80.5778	46.0276	48.0288	0.0458639	0.920009	0.310423	ambiguous	conserved-expression	0.0614005	0.402396
FBgn0074868	52	24	15	17	51.5961	24.1733	15.009	17.0102	0.00339429	0.863606	0.118434	ambiguous	conserved-expression	0.180572	0.913274
FBgn0073336	217	294	73	92	215.315	296.123	73.0439	92.0553	0.0013922	0.324765	0.782282	ambiguous	under-dominant	0.333737	0.126014
FBgn0080036	27	51	15	17	26.7903	51.3683	15.009	17.0102	0.0129778	0.863606	0.402276	ambiguous	conserved-expression	0.180572	0.758596
FBgn0073924	169	127	96	73	167.687	127.917	96.0577	73.0439	0.0347615	0.237974	0.993223	ambiguous	dominant	0.395138	0.00457392
FBgn0247836	201	99	80	59	199.439	99.715	80.0481	59.0354	2.35592e-08	0.233004	0.172522	ambiguous	additive	0.439285	0.560779
FBgn0250158	137	196	75	77	135.936	197.416	75.0451	77.0463	0.00258713	0.934795	0.196245	ambiguous	dominant	0.0379679	0.500341
FBgn0246387	4	16	4	3	3.96893	16.1156	4.0024	3.0018	0.0122715	0.860728	0.180834	ambiguous	conserved-expression	0.415037	1.60659
FBgn0248769	1002	1116	487	460	994.218	1124.06	487.293	460.276	0.0182635	0.656436	0.0746509	ambiguous	dominant	0.0822879	0.0947973
FBgn0081172	196	291	86	88	194.478	293.102	86.0517	88.0529	4.27359e-05	0.938247	0.0939611	ambiguous	dominant	0.0331669	0.558629
FBgn0085119	184	111	119	109	182.571	111.802	119.071	109.065	9.13886e-05	0.744527	0.0810838	ambiguous	dominant	0.126633	0.580882
FBgn0079431	2359	2512	923	897	2340.68	2530.14	923.555	897.539	0.0302616	0.79842	0.146016	ambiguous	under-dominant	0.0412227	0.0710691
FBgn0075084	46	24	10	11	45.6427	24.1733	10.006	11.0066	0.0191568	0.920009	0.306294	ambiguous	dominant	0.137504	0.779465
FBgn0081076	120	58	44	31	119.068	58.4189	44.0264	31.0186	1.38932e-05	0.335619	0.380837	ambiguous	dominant	0.505235	0.522044
FBgn0072888	426	302	139	135	422.691	304.181	139.084	135.081	2.58544e-05	0.928206	0.10822	ambiguous	dominant	0.0421255	0.432549
FBgn0078475	120	81	56	37	119.068	81.585	56.0336	37.0222	0.0152587	0.173064	0.940434	ambiguous	conserved-expression	0.597902	0.0524917
FBgn0071440	1469	1218	588	551	1457.59	1226.8	588.353	551.331	1.32143e-05	0.549177	0.282041	ambiguous	dominant	0.0937638	0.154926
FBgn0246412	219	111	103	78	217.299	111.802	103.062	78.0469	1.77209e-08	0.211014	0.123591	ambiguous	dominant	0.401098	0.557642
FBgn0244884	163	109	68	60	161.734	109.787	68.0409	60.036	0.0033251	0.722071	0.409549	ambiguous	conserved-expression	0.180572	0.378341
FBgn0081507	298	234	148	107	295.686	235.69	148.089	107.064	0.0158281	0.0592223	0.702242	ambiguous	conserved-expression	0.467986	0.140813
FBgn0072447	210	270	117	115	208.369	271.95	117.07	115.069	0.0112933	0.972525	0.194014	ambiguous	conserved-expression	0.0248747	0.359326
FBgn0247854	17	4	5	3	16.868	4.02889	5.003	3.0018	0.00825552	0.710171	0.516182	ambiguous	conserved-expression	0.736966	1.32887
FBgn0079081	354	274	176	182	351.251	275.979	176.106	182.109	0.00483353	0.86567	0.115633	ambiguous	dominant	0.048363	0.29958
FBgn0075562	632	834	194	244	627.091	840.023	194.117	244.147	3.17925e-07	0.0734348	0.736738	ambiguous	under-dominant	0.330824	0.0909291
FBgn0077586	473	594	259	261	469.326	598.29	259.156	261.157	0.000423267	0.95509	0.0914716	ambiguous	dominant	0.0110977	0.339156
FBgn0073355	67	117	51	49	66.4796	117.845	51.0306	49.0294	0.000544597	0.938974	0.0560659	ambiguous	dominant	0.0577155	0.768191
FBgn0075425	549	436	238	215	544.736	439.149	238.143	215.129	0.00138663	0.543534	0.514168	ambiguous	dominant	0.146625	0.164222
FBgn0078458	274	181	140	121	271.872	182.307	140.084	121.073	6.37452e-05	0.490003	0.243869	ambiguous	dominant	0.21042	0.366136
FBgn0082135	431	336	207	164	427.653	338.427	207.124	164.099	0.00233734	0.117639	0.995784	ambiguous	conserved-expression	0.335935	0.00166096
FBgn0081211	100	138	52	47	99.2233	138.997	52.0312	47.0282	0.0246967	0.813402	0.176682	ambiguous	dominant	0.145851	0.340448
FBgn0075946	286	183	119	103	283.779	184.322	119.071	103.062	1.11031e-05	0.541602	0.200997	ambiguous	dominant	0.208317	0.414224
FBgn0078087	606	729	331	340	601.293	734.265	331.199	340.204	0.00136373	0.844798	0.176939	ambiguous	conserved-expression	0.0387035	0.249528
FBgn0081242	766	857	508	499	760.051	863.189	508.305	499.3	0.0332985	0.92542	0.181755	ambiguous	over-dominant	0.0257887	0.157793
FBgn0080615	96	168	78	88	95.2544	169.213	78.0469	88.0529	2.55103e-05	0.658398	0.0813837	ambiguous	dominant	0.174029	0.654956
FBgn0064440	203	269	87	101	201.423	270.943	87.0523	101.061	0.00467584	0.53592	0.590929	ambiguous	dominant	0.215268	0.212489
FBgn0013863	66	133	25	25	65.4874	133.961	25.015	25.015	5.68068e-06	0.998184	0.0860793	ambiguous	dominant	0	1.03252
FBgn0247267	868	768	319	316	861.259	773.547	319.192	316.19	0.0395965	0.991147	0.490344	ambiguous	under-dominant	0.0136319	0.141326
FBgn0077669	728	581	264	240	722.346	585.196	264.159	240.144	0.000273463	0.549177	0.465689	ambiguous	under-dominant	0.137504	0.166266
FBgn0076579	304	231	131	122	301.639	232.668	131.079	122.073	0.00528364	0.791348	0.400801	ambiguous	conserved-expression	0.102686	0.271862
FBgn0247650	1764	1596	801	792	1750.3	1607.53	801.481	792.476	0.015962	0.955443	0.410206	ambiguous	dominant	0.0163018	0.106457
FBgn0074327	1060	938	513	479	1051.77	944.774	513.308	479.288	0.0218723	0.551825	0.774198	ambiguous	conserved-expression	0.0989332	0.0558405
FBgn0080306	314	427	223	231	311.561	430.084	223.134	231.139	7.68574e-05	0.837775	0.060928	ambiguous	dominant	0.0508491	0.414253
FBgn0245220	78	33	34	24	77.3942	33.2383	34.0204	24.0144	6.42991e-05	0.419409	0.299556	ambiguous	dominant	0.5025	0.716877
FBgn0244208	377	218	114	97	374.072	219.574	114.068	97.0583	6.88107e-10	0.490876	0.0765157	ambiguous	dominant	0.232977	0.535628
FBgn0248874	35	14	7	10	34.7282	11.2317	7.00421	7.9699	0.00104116	0.907631	0.106516	ambiguous	dominant	0.186341	1.44219
FBgn0249048	696	883	433	488	690.594	889.377	433.26	488.293	5.45368e-06	0.195826	0.249949	ambiguous	dominant	0.172514	0.192443
FBgn0077762	898	776	247	263	891.026	781.604	247.148	263.158	0.0106998	0.68285	0.151429	ambiguous	under-dominant	0.0905518	0.0984763
FBgn0075456	1248	1500	560	584	1238.31	1510.83	560.336	584.351	2.71163e-06	0.669389	0.08584	ambiguous	dominant	0.0605415	0.226434
FBgn0079982	682	772	360	364	676.703	777.576	360.216	364.219	0.0263865	0.926439	0.324675	ambiguous	conserved-expression	0.0159415	0.184518
FBgn0248403	1358	1596	515	552	1347.45	1607.53	515.309	552.332	1.96544e-05	0.462775	0.288819	ambiguous	under-dominant	0.100096	0.154512
FBgn0072879	275	138	124	93	272.864	138.997	124.075	93.0559	1.26058e-10	0.143834	0.0833425	ambiguous	additive	0.415037	0.558095
FBgn0070754	73	112	27	46	72.433	112.809	27.0162	46.0276	0.008347	0.104153	0.864399	ambiguous	dominant	0.768674	0.129513
FBgn0080301	222	167	109	91	220.276	168.206	109.065	91.0547	0.0146847	0.444248	0.768012	ambiguous	conserved-expression	0.26039	0.128691
FBgn0081534	147	82	53	39	145.858	82.5922	53.0318	39.0234	7.14588e-05	0.356025	0.494951	ambiguous	dominant	0.442518	0.377971
FBgn0079176	173	123	91	89	171.656	123.888	91.0547	89.0535	0.0102824	0.963588	0.25028	ambiguous	dominant	0.0320612	0.438422
FBgn0070187	195	109	90	73	193.486	109.787	90.0541	73.0439	4.20155e-06	0.416991	0.182018	ambiguous	dominant	0.302029	0.515487
FBgn0072892	111	65	33	18	110.138	65.4694	33.0198	18.0108	0.00165155	0.137383	0.889048	ambiguous	dominant	0.874469	0.124052
FBgn0079538	987	863	587	556	979.334	869.233	587.353	556.334	0.0143878	0.641705	0.584403	ambiguous	over-dominant	0.0782756	0.0937832
FBgn0070933	849	982	521	519	842.406	989.092	521.313	519.312	0.00298201	0.998184	0.106594	ambiguous	dominant	0.00554883	0.22604
FBgn0073485	420	305	151	122	416.738	307.203	151.091	122.073	0.000102428	0.24626	0.699517	ambiguous	dominant	0.307667	0.132282
FBgn0080988	808	904	380	366	801.725	910.529	380.228	366.22	0.0283057	0.826006	0.161293	ambiguous	dominant	0.0541558	0.129442
FBgn0081563	56	100	26	48	55.5651	100.722	26.0156	48.0288	0.000993261	0.0520931	0.974226	ambiguous	conserved-expression	0.884523	0.0263908
FBgn0244058	168	105	69	52	166.695	105.758	69.0415	52.0312	0.000511547	0.318517	0.629634	ambiguous	dominant	0.408085	0.248356
FBgn0072589	386	448	205	192	383.002	451.236	205.123	192.115	0.0475193	0.754928	0.160579	ambiguous	conserved-expression	0.0945176	0.142011
FBgn0072648	62	37	8	13	61.5185	37.2672	8.00481	13.0078	0.0266906	0.508005	0.124427	ambiguous	dominant	0.70044	0.0226725
FBgn0250388	187	122	60	64	185.548	122.881	60.036	64.0385	0.000798868	0.856785	0.0851542	ambiguous	dominant	0.0931094	0.501417
FBgn0077639	42	70	11	13	41.6738	70.5056	11.0066	13.0078	0.0158329	0.83916	0.623488	ambiguous	dominant	0.241008	0.517588
FBgn0070883	303	430	164	194	300.647	433.106	164.099	194.117	7.03632e-06	0.278672	0.282591	ambiguous	dominant	0.242361	0.284289
FBgn0244930	188	83	51	42	186.54	83.5994	51.0306	42.0252	1.0375e-09	0.604992	0.052913	ambiguous	dominant	0.280108	0.877811
FBgn0076601	318	393	126	149	315.53	395.838	126.076	149.09	0.00874871	0.362539	0.816815	ambiguous	dominant	0.241889	0.0852447
FBgn0070743	474	306	234	196	470.319	308.21	234.141	196.118	1.74175e-08	0.22509	0.126185	ambiguous	dominant	0.255655	0.35407
FBgn0081193	441	354	217	219	437.575	356.557	217.13	219.132	0.00694727	0.953873	0.186708	ambiguous	dominant	0.0132358	0.282163
FBgn0247409	6	48	3	5	5.9534	48.3467	3.0018	5.003	6.21312e-09	0.704625	0.192647	ambiguous	dominant	0.736966	2.28467
FBgn0079987	348	443	177	171	345.297	446.199	177.106	171.103	0.00144474	0.897824	0.0810838	ambiguous	dominant	0.049753	0.320097
FBgn0070521	4511	4061	1800	1663	4475.96	4090.33	1801.08	1664	2.34437e-05	0.11601	0.88401	ambiguous	under-dominant	0.114209	0.0157728
FBgn0070287	118	75	35	42	117.084	75.5417	35.021	42.0252	0.00561834	0.652354	0.0760595	ambiguous	dominant	0.263034	0.369159
FBgn0081705	36	12	9	3	35.7204	12.0867	9.00541	3.0018	0.00125786	0.231558	0.992134	ambiguous	dominant	1.58496	0.0216307
FBgn0070707	307	487	132	159	304.616	490.517	132.079	159.096	5.34656e-10	0.281296	0.111573	ambiguous	dominant	0.268489	0.418825
FBgn0071472	454	382	218	220	450.474	384.759	218.131	220.132	0.0343831	0.953873	0.321798	ambiguous	conserved-expression	0.0131754	0.214314
FBgn0248866	314	255	90	87	311.561	256.842	90.0541	87.0523	0.0342291	0.931504	0.553205	ambiguous	under-dominant	0.0489096	0.229727
FBgn0072110	313	431	150	168	310.569	434.113	150.09	168.101	3.67011e-05	0.537301	0.235315	ambiguous	dominant	0.163499	0.319657
FBgn0074708	1282	1032	567	501	1272.04	1039.45	567.341	501.301	2.27331e-06	0.175453	0.487219	ambiguous	dominant	0.178538	0.112784
FBgn0079558	601	514	247	222	596.332	517.712	247.148	222.133	0.026925	0.508005	0.864738	ambiguous	dominant	0.153951	0.0500145
FBgn0076520	49	26	30	20	48.6194	26.1878	30.018	20.012	0.0179709	0.371298	0.740545	ambiguous	dominant	0.584963	0.307677
FBgn0080426	9	26	5	3	8.9301	26.1878	5.003	3.0018	0.00768599	0.710171	0.141319	ambiguous	dominant	0.736966	0.81518
FBgn0072870	540	429	286	268	535.806	432.098	286.172	268.161	0.00155566	0.70717	0.324314	ambiguous	dominant	0.0937821	0.216569
FBgn0078386	967	746	393	352	959.49	751.388	393.236	352.211	9.85243e-07	0.355625	0.278684	ambiguous	dominant	0.158954	0.193756
FBgn0249662	316	203	94	91	313.546	204.466	94.0565	91.0547	4.31467e-06	0.93444	0.0754521	ambiguous	dominant	0.0467942	0.57002
FBgn0073524	41	75	16	16	40.6816	75.5417	16.0096	16.0096	0.00343631	0.998184	0.276635	ambiguous	dominant	0	0.892897
FBgn0075164	500	654	232	286	496.117	658.723	232.139	286.172	1.33584e-05	0.0754436	0.671843	ambiguous	dominant	0.30189	0.107103
FBgn0072162	415	500	178	181	411.777	503.611	178.107	181.109	0.0084992	0.930213	0.294788	ambiguous	dominant	0.0241125	0.266335
FBgn0074980	344	512	153	184	341.328	515.698	153.092	184.111	2.7401e-08	0.242292	0.197773	ambiguous	dominant	0.266174	0.329192
FBgn0075497	215	147	104	88	213.33	148.062	104.062	88.0529	0.00127519	0.498283	0.4635	ambiguous	dominant	0.241008	0.285882
FBgn0072318	228	164	84	72	226.229	165.184	84.0505	72.0433	0.00398015	0.593761	0.594316	ambiguous	dominant	0.222392	0.231315
FBgn0244233	289	211	142	122	286.755	212.524	142.085	122.073	0.00179823	0.467759	0.530918	ambiguous	dominant	0.21901	0.213186
FBgn0070666	792	650	362	324	785.849	654.694	362.217	324.195	0.000929037	0.375137	0.631837	ambiguous	dominant	0.159996	0.103434
FBgn0071088	212	277	102	119	210.353	279.001	102.061	119.071	0.00630789	0.475945	0.623488	ambiguous	dominant	0.222392	0.18506
FBgn0244039	371	553	198	246	368.119	556.994	198.119	246.148	6.30088e-09	0.0913837	0.221172	ambiguous	additive	0.313158	0.284333
FBgn0079373	157	107	48	48	155.781	107.773	48.0288	48.0288	0.00616191	0.998184	0.273633	ambiguous	dominant	0	0.531523
FBgn0081164	56	26	26	28	55.5651	26.1878	26.0156	28.0168	0.00245705	0.894772	0.073692	ambiguous	dominant	0.106915	0.978369
FBgn0073157	102	68	40	40	101.208	68.4911	40.024	40.024	0.0218877	0.998184	0.313656	ambiguous	conserved-expression	0	0.563332
FBgn0074923	183	107	44	39	181.579	107.773	44.0264	39.0234	3.68142e-05	0.791586	0.252379	ambiguous	dominant	0.174029	0.578573
FBgn0081046	422	298	272	214	418.722	300.152	272.163	214.129	2.30595e-05	0.0533885	0.624227	ambiguous	dominant	0.345996	0.134304
FBgn0075489	122	88	41	41	121.052	88.6356	41.0246	41.0246	0.0422463	0.998184	0.419548	ambiguous	dominant	0	0.449675
FBgn0250536	558	690	225	250	553.666	694.983	225.135	250.15	0.000361713	0.467759	0.450589	ambiguous	under-dominant	0.152003	0.175959
FBgn0077738	436	531	217	231	432.614	534.835	217.13	231.139	0.00401215	0.710125	0.366469	ambiguous	dominant	0.0901978	0.215817
FBgn0070742	252	153	132	96	250.043	154.105	132.079	96.0577	4.89663e-06	0.0857345	0.523356	ambiguous	dominant	0.459432	0.23883
FBgn0075027	991	884	319	297	983.303	890.384	319.192	297.178	0.0406131	0.647214	0.871904	ambiguous	under-dominant	0.103093	0.0401145
FBgn0246989	183	107	99	87	181.579	107.773	99.0595	87.0523	3.68142e-05	0.638758	0.118037	ambiguous	dominant	0.186413	0.566189
FBgn0079451	326	386	111	105	323.468	388.788	111.067	105.063	0.0382235	0.860548	0.273182	ambiguous	under-dominant	0.0801703	0.185189
FBgn0074695	147	193	84	76	145.858	194.394	84.0505	76.0457	0.0222983	0.756655	0.127587	ambiguous	conserved-expression	0.14439	0.270026
FBgn0244077	252	430	126	169	250.043	433.106	126.076	169.102	3.10412e-11	0.0582085	0.185427	ambiguous	dominant	0.4236	0.368944
FBgn0076564	4	18	1	7	3.96893	18.13	1.0006	7.00421	0.00469842	0.104153	0.84011	ambiguous	conserved-expression	2.80735	0.615799
FBgn0081855	430	542	157	176	426.66	545.914	157.094	176.106	0.000652369	0.520121	0.49521	ambiguous	under-dominant	0.164811	0.190776
FBgn0244870	525	381	260	242	520.923	383.752	260.156	242.145	1.16965e-05	0.685756	0.111128	ambiguous	dominant	0.103505	0.337391
FBgn0247432	327	412	223	223	324.46	414.976	223.134	223.134	0.00333477	0.998184	0.120742	ambiguous	dominant	0	0.354984
FBgn0248229	2	23	0	3	1.98447	23.1661	1	3.0018	2.06922e-05	0.545334	0.559983	ambiguous	dominant	1.58583	1.95936
FBgn0071751	428	502	181	162	424.676	505.626	181.109	162.097	0.0238713	0.564423	0.0810121	ambiguous	under-dominant	0.159996	0.0917114
FBgn0081626	234	179	104	94	232.183	180.293	104.062	94.0565	0.018392	0.722514	0.578922	ambiguous	conserved-expression	0.145851	0.219067
FBgn0071012	476	569	255	269	472.303	573.109	255.153	269.162	0.00685608	0.730764	0.366469	ambiguous	conserved-expression	0.0771089	0.201989
XLOC_007628	17	52	13	18	16.868	52.3756	13.0078	18.0108	5.408e-05	0.604992	0.199743	ambiguous	dominant	0.469485	1.16512
FBgn0077521	42	13	12	11	41.6738	13.0939	12.0072	11.0066	0.000226499	0.930913	0.120475	ambiguous	dominant	0.125531	1.54472
FBgn0075088	136	90	37	24	134.944	90.65	37.0222	24.0144	0.00637602	0.268907	0.949718	ambiguous	under-dominant	0.624491	0.0505118
FBgn0077672	204	133	117	93	202.416	133.961	117.07	93.0559	0.000432555	0.279776	0.499383	ambiguous	dominant	0.331206	0.264306
FBgn0080699	308	405	203	237	305.608	407.925	203.122	237.142	0.000593082	0.263914	0.464952	ambiguous	dominant	0.223407	0.193215
FBgn0073556	746	594	271	247	740.206	598.29	271.163	247.148	0.0001946	0.555693	0.435123	ambiguous	under-dominant	0.133782	0.1733
FBgn0071920	11	30	8	10	10.9146	30.2167	8.00481	10.006	0.005865	0.813402	0.350821	ambiguous	conserved-expression	0.321928	1.14716
XLOC_013111	178	132	85	86	176.618	132.953	85.0511	86.0517	0.0227061	0.969639	0.269972	ambiguous	conserved-expression	0.0168738	0.392835
FBgn0079850	252	309	105	111	250.043	311.232	105.063	111.067	0.0266537	0.830216	0.505498	ambiguous	dominant	0.0801703	0.235643
FBgn0080757	543	450	231	252	538.783	453.25	231.139	252.151	0.010596	0.555693	0.0687208	ambiguous	conserved-expression	0.125531	0.123866
FBgn0076265	107	193	48	75	106.169	194.394	48.0288	75.0451	1.98385e-06	0.0687043	0.662285	ambiguous	dominant	0.643856	0.228765
FBgn0262669	45	79	19	30	44.6505	79.5706	19.0114	30.018	0.00479008	0.292286	0.848416	ambiguous	dominant	0.658963	0.174595
FBgn0073568	95	62	26	28	94.2622	62.4478	26.0156	28.0168	0.0203525	0.894772	0.275894	ambiguous	dominant	0.106915	0.487113
FBgn0081241	327	387	156	196	324.46	389.795	156.094	196.118	0.0384833	0.120506	0.850808	ambiguous	conserved-expression	0.329308	0.064634
FBgn0073771	227	292	96	112	225.237	294.109	96.0577	112.067	0.00808198	0.489506	0.678964	ambiguous	dominant	0.222392	0.162514
FBgn0077358	11	26	7	7	10.9146	26.1878	7.00421	7.00421	0.0247448	0.998184	0.343924	ambiguous	conserved-expression	0	1.26264
FBgn0071188	130	188	68	66	128.99	189.358	68.0409	66.0397	0.00243844	0.952288	0.131342	ambiguous	dominant	0.0430687	0.510783
FBgn0080298	379	504	237	270	376.056	507.64	237.142	270.162	5.91334e-05	0.322252	0.282971	ambiguous	dominant	0.188072	0.244784
FBgn0081185	84	53	28	29	83.3476	53.3828	28.0168	29.0174	0.0193532	0.950808	0.282578	ambiguous	conserved-expression	0.0506261	0.59214
FBgn0243535	77	122	15	23	76.402	122.881	15.009	23.0138	0.00306363	0.412008	0.94436	ambiguous	under-dominant	0.616671	0.0689102
FBgn0074256	226	169	98	108	224.245	170.221	98.0589	108.065	0.0118279	0.699908	0.0966278	ambiguous	conserved-expression	0.140178	0.257491
FBgn0078539	638	509	361	341	633.045	512.676	361.217	341.205	0.000684659	0.715402	0.249745	ambiguous	dominant	0.0822271	0.222033
FBgn0079220	297	352	141	118	294.693	354.542	141.085	118.071	0.0475077	0.375137	0.0523516	ambiguous	dominant	0.256908	0.00983492
FBgn0071458	90	127	53	41	89.301	127.917	53.0318	41.0246	0.0219656	0.456876	0.0503792	ambiguous	dominant	0.370368	0.148094
FBgn0074485	981	1257	404	466	973.381	1266.08	404.243	466.28	1.1668e-08	0.122051	0.288974	ambiguous	under-dominant	0.205975	0.173316
FBgn0072837	140	212	50	57	138.913	213.531	50.03	57.0342	0.000298336	0.713037	0.349848	ambiguous	dominant	0.189034	0.431234
FBgn0076857	340	413	133	138	337.359	415.983	133.08	138.083	0.0133128	0.875908	0.408297	ambiguous	under-dominant	0.053242	0.248996
FBgn0079230	244	341	104	136	242.105	343.463	104.062	136.082	0.000142386	0.136626	0.761514	ambiguous	dominant	0.387023	0.117498
FBgn0248624	277	367	131	140	274.849	401.753	131.079	152.25	7.23111e-06	0.42061	0.260126	ambiguous	dominant	0.216005	0.331665
FBgn0079308	34	68	15	12	33.7359	68.4911	15.009	12.0072	0.00170251	0.774218	0.105232	ambiguous	dominant	0.321928	0.699703
FBgn0078984	761	903	363	403	755.09	909.522	363.218	403.242	0.000865464	0.325844	0.549296	ambiguous	dominant	0.15081	0.11765
FBgn0071889	11	121	4	11	10.9146	121.874	4.0024	11.0066	5.64647e-24	0.204918	0.142745	ambiguous	dominant	1.45943	2.02163
FBgn0245571	13	32	7	18	12.899	32.2311	7.00421	18.0108	0.00901024	0.105523	0.979244	ambiguous	conserved-expression	1.36257	0.0413791
FBgn0078540	255	199	124	130	253.02	200.437	124.075	130.078	0.0226624	0.84175	0.188783	ambiguous	dominant	0.0681715	0.267927
FBgn0077814	495	642	201	243	491.156	646.637	201.121	243.146	2.9063e-05	0.152936	0.63902	ambiguous	dominant	0.273761	0.123015
FBgn0076132	460	559	232	272	456.427	563.037	232.139	272.163	0.00343631	0.210901	0.790909	ambiguous	conserved-expression	0.229482	0.0733633
FBgn0244415	172	94	82	74	170.664	94.6789	82.0493	74.0445	8.322e-06	0.752632	0.0641346	ambiguous	dominant	0.148099	0.701947
FBgn0246578	1189	964	499	427	1179.77	970.962	499.3	427.257	1.1638e-05	0.0963568	0.776363	ambiguous	dominant	0.224804	0.0562092
FBgn0074023	14	29	5	8	13.8913	29.2094	5.003	8.00481	0.0392125	0.640708	0.816905	ambiguous	dominant	0.678072	0.394185
FBgn0080101	27	51	18	13	26.7903	51.3683	18.0108	13.0078	0.0129778	0.617299	0.0794284	ambiguous	conserved-expression	0.469485	0.469683
FBgn0081609	4	50	2	4	3.96893	50.3611	2.0012	4.0024	7.11276e-11	0.64743	0.217123	ambiguous	dominant	1	2.66549
FBgn0080682	31	7	9	2	30.7592	7.05056	9.00541	2.0012	0.00019397	0.118402	0.986988	ambiguous	dominant	2.16993	0.0447143
FBgn0080774	540	657	333	335	535.806	661.745	333.2	335.201	0.00132339	0.956122	0.105421	ambiguous	dominant	0.00863892	0.295926
FBgn0082106	431	351	258	236	427.653	353.535	258.155	236.142	0.0131686	0.591153	0.577279	ambiguous	dominant	0.128584	0.146002
FBgn0076320	195	310	100	107	193.486	312.239	100.06	107.064	9.06772e-07	0.796646	0.0523516	ambiguous	dominant	0.0976108	0.592814
FBgn0072145	73	30	34	19	72.433	30.2167	34.0204	19.0114	7.25898e-05	0.148632	0.609568	ambiguous	dominant	0.839535	0.421768
FBgn0075163	176	262	86	98	174.633	263.892	86.0517	98.0589	9.82913e-05	0.604137	0.252614	ambiguous	dominant	0.188445	0.407177
FBgn0077619	673	847	332	368	667.773	853.117	332.199	368.221	1.70576e-05	0.364628	0.269648	ambiguous	dominant	0.148523	0.204864
FBgn0248778	333	222	143	122	330.414	223.603	143.086	122.073	1.42858e-05	0.438112	0.274067	ambiguous	dominant	0.229134	0.334198
XLOC_006819	3	18	1	8	2.9767	18.13	1.0006	8.00481	0.00155566	0.0648654	0.903843	ambiguous	conserved-expression	3	0.393407
FBgn0080106	189	335	96	147	187.532	282.409	96.0577	123.108	6.20357e-05	0.202027	0.500501	ambiguous	dominant	0.357954	0.232696
FBgn0248103	8	23	8	6	7.93787	23.1661	8.00481	6.0036	0.0129869	0.791586	0.123924	ambiguous	conserved-expression	0.415037	1.13016
FBgn0079528	638	810	356	408	633.045	815.85	356.214	408.245	1.33584e-05	0.177204	0.366383	ambiguous	dominant	0.196692	0.169304
FBgn0243705	694	602	344	378	688.61	606.348	344.207	378.227	0.0311871	0.407673	0.0628998	ambiguous	dominant	0.135978	0.0475638
FBgn0080438	127	208	58	70	126.014	209.502	58.0348	70.0421	2.60089e-05	0.518461	0.281347	ambiguous	dominant	0.271302	0.462084
FBgn0244886	101	62	42	40	100.216	62.4478	42.0252	40.024	0.00624423	0.930062	0.268605	ambiguous	conserved-expression	0.0703893	0.611995
FBgn0080746	171	233	102	111	169.672	234.683	102.061	111.067	0.00409475	0.737912	0.323557	ambiguous	conserved-expression	0.121991	0.345974
FBgn0246224	4	24	4	4	3.96893	24.1733	4.0024	4.0024	0.000220686	0.998184	0.123924	ambiguous	dominant	0	2.60659
FBgn0071857	197	154	61	50	195.47	155.112	61.0366	50.03	0.0495412	0.549177	0.938332	ambiguous	under-dominant	0.286881	0.0467534
FBgn0073352	658	510	352	304	652.89	513.683	352.211	304.183	9.03081e-05	0.214275	0.538348	ambiguous	dominant	0.211504	0.134456
FBgn0080391	288	395	96	124	285.763	397.853	96.0577	124.075	9.87221e-05	0.183648	0.784854	ambiguous	under-dominant	0.369234	0.108181
FBgn0074092	3047	2587	1140	1029	3023.34	2605.68	1140.68	1029.62	2.67585e-08	0.0995413	0.560106	ambiguous	under-dominant	0.147791	0.0666879
FBgn0070252	7	21	2	6	6.94563	21.1517	2.0012	6.0036	0.0147027	0.350592	0.993223	ambiguous	dominant	1.58496	0.0216307
FBgn0249145	5	49	4	11	4.96117	39.9937	4.0024	8.91915	1.55867e-07	0.375332	0.188034	ambiguous	dominant	1.15604	1.85498
FBgn0076820	932	1138	558	599	924.761	1146.22	558.335	599.36	1.14691e-05	0.425539	0.142745	ambiguous	dominant	0.102291	0.207439
FBgn0078166	244	322	120	134	242.105	324.326	120.072	134.081	0.00210749	0.604479	0.416712	ambiguous	dominant	0.159199	0.262612
FBgn0247737	273	204	92	73	270.88	205.473	92.0553	73.0439	0.00514448	0.350785	0.893136	ambiguous	dominant	0.333737	0.0649637
FBgn0071528	266	197	85	87	263.934	198.423	85.0511	87.0523	0.00442664	0.93804	0.208201	ambiguous	dominant	0.0335526	0.378047
FBgn0072216	468	343	228	204	464.365	345.477	228.137	204.123	6.44842e-05	0.506543	0.272637	ambiguous	dominant	0.160465	0.266205
FBgn0248858	24	51	10	16	23.8136	51.038	10.006	15.9067	0.00424571	0.476849	0.70592	ambiguous	dominant	0.668764	0.431022
FBgn0079543	3	47	3	7	2.9767	47.3394	3.0018	7.00421	6.27068e-11	0.42199	0.123924	ambiguous	dominant	1.22239	2.76886
FBgn0078435	110	195	58	82	109.146	196.408	58.0348	82.0493	3.25309e-06	0.148413	0.438453	ambiguous	dominant	0.499571	0.34803
FBgn0244173	101	182	52	66	100.216	183.314	52.0312	66.0397	4.20155e-06	0.413266	0.23879	ambiguous	dominant	0.343954	0.527259
FBgn0078283	388	492	227	271	384.987	495.553	227.136	271.163	0.000907419	0.157089	0.686389	ambiguous	dominant	0.255601	0.108632
FBgn0246565	3796	3546	1582	1604	3766.52	3571.61	1582.95	1604.96	0.0195648	0.79842	0.258188	ambiguous	under-dominant	0.0199245	0.0567322
FBgn0074509	301	208	109	93	298.662	209.502	109.065	93.0559	0.000174423	0.514339	0.431246	ambiguous	dominant	0.229026	0.282524
FBgn0245916	100	150	54	76	99.2233	151.083	54.0324	76.0457	0.00331897	0.172188	0.843843	ambiguous	conserved-expression	0.49304	0.113553
FBgn0075767	38	77	17	28	37.7049	77.5561	17.0102	28.0168	0.000646483	0.265789	0.719768	ambiguous	dominant	0.719892	0.320598
FBgn0072750	301	240	135	105	298.662	241.733	135.081	105.063	0.0234411	0.188739	0.890776	ambiguous	dominant	0.36257	0.0574717
FBgn0247733	221	292	149	180	219.284	294.109	149.09	180.108	0.00340732	0.235425	0.652518	ambiguous	dominant	0.272685	0.150868
FBgn0071469	43	17	22	10	42.666	19.4679	22.0132	11.3764	0.00652823	0.207067	0.886062	ambiguous	conserved-expression	0.952321	0.179668
FBgn0073457	310	228	118	112	307.592	229.647	118.071	112.067	0.00155247	0.865095	0.281384	ambiguous	dominant	0.0752881	0.346316
FBgn0075896	706	816	332	320	700.517	821.893	332.199	320.192	0.00756974	0.840903	0.109797	ambiguous	dominant	0.0531113	0.17742
FBgn0079570	56	164	32	49	55.5651	165.184	32.0192	49.0294	6.50789e-13	0.185645	0.0624582	ambiguous	dominant	0.61471	0.957118
FBgn0247817	119	238	57	74	118.076	239.719	57.0342	74.0445	9.48291e-10	0.323921	0.103853	ambiguous	dominant	0.376563	0.645067
FBgn0071317	358	258	146	116	355.22	259.863	146.088	116.07	0.000261894	0.214082	0.746144	ambiguous	dominant	0.331844	0.119114
FBgn0073913	36	12	8	8	35.7204	12.0867	8.00481	8.00481	0.00125786	0.998184	0.182493	ambiguous	dominant	0	1.56333
FBgn0245747	398	257	154	136	394.909	258.856	154.093	136.082	2.82925e-07	0.549177	0.11078	ambiguous	dominant	0.179324	0.430046
FBgn0077271	83	56	48	46	82.3554	56.4044	48.0288	46.0276	0.0469246	0.936053	0.392047	ambiguous	dominant	0.0614005	0.484653
FBgn0076723	304	360	165	174	301.639	362.6	165.099	174.105	0.0458724	0.791586	0.524061	ambiguous	conserved-expression	0.0766213	0.188935
FBgn0249659	123	59	36	25	122.045	59.4261	36.0216	25.015	8.81094e-06	0.375057	0.434813	ambiguous	dominant	0.526069	0.512172
FBgn0073347	64	36	15	18	63.5029	36.26	15.009	18.0108	0.0124479	0.789818	0.174214	ambiguous	dominant	0.263034	0.54541
XLOC_010614	58	30	32	26	57.5495	30.2167	32.0192	26.0156	0.0071578	0.6766	0.386516	ambiguous	dominant	0.29956	0.629899
FBgn0077969	2196	2020	1081	1092	2178.94	2034.59	1081.65	1092.66	0.0274495	0.876412	0.291096	ambiguous	conserved-expression	0.0146063	0.0842857
FBgn0074441	373	471	165	188	370.103	474.402	165.099	188.113	0.00145205	0.431629	0.552702	ambiguous	dominant	0.188267	0.169916
FBgn0074345	49	82	23	23	48.6194	82.5922	23.0138	23.0138	0.00806058	0.998184	0.276525	ambiguous	dominant	0	0.764473
FBgn0070846	411	617	193	236	407.808	621.456	193.116	236.142	3.99724e-10	0.131511	0.157266	ambiguous	dominant	0.290186	0.317577
FBgn0080833	997	1092	541	568	989.257	1099.89	541.325	568.341	0.0484527	0.617446	0.631837	ambiguous	dominant	0.0702623	0.0826758
FBgn0245817	4	53	1	7	3.96893	53.3828	1.0006	7.00421	1.1396e-11	0.104153	0.763717	ambiguous	dominant	2.80735	0.942196
FBgn0249945	435	315	119	126	431.622	317.275	119.071	126.076	6.52624e-05	0.813402	0.0512401	ambiguous	under-dominant	0.0824622	0.361571
FBgn0070914	173	84	60	44	171.656	84.6067	60.036	44.0264	1.53353e-07	0.309715	0.229806	ambiguous	dominant	0.447459	0.573221
FBgn0074891	117	75	64	59	116.091	75.5417	64.0385	59.0354	0.00682468	0.836082	0.289167	ambiguous	dominant	0.117357	0.502558
FBgn0244190	478	642	308	366	474.288	646.637	308.185	366.22	2.33111e-06	0.097407	0.326553	ambiguous	dominant	0.248913	0.19828
FBgn0070093	80	132	24	28	79.3787	132.953	24.0144	28.0168	0.00082951	0.772822	0.437136	ambiguous	under-dominant	0.222392	0.521704
FBgn0071085	494	669	181	229	490.163	673.832	181.109	229.138	7.25286e-07	0.0765391	0.662285	ambiguous	under-dominant	0.339358	0.119768
FBgn0079076	385	450	205	192	382.01	453.25	205.123	192.115	0.0374549	0.754928	0.145691	ambiguous	conserved-expression	0.0945176	0.15218
FBgn0072455	11	33	4	5	10.9146	33.2383	4.0024	5.003	0.00181672	0.875908	0.435107	ambiguous	dominant	0.321928	1.28467
FBgn0073994	31	52	4	11	30.7592	52.3756	4.0024	11.0066	0.0378341	0.204918	0.624698	ambiguous	under-dominant	1.45943	0.691557
FBgn0079177	204	156	81	62	202.416	157.127	81.0487	62.0373	0.0284018	0.303713	0.969995	ambiguous	dominant	0.385654	0.0202613
FBgn0079183	297	178	129	106	294.693	179.286	129.078	106.064	3.27562e-07	0.343752	0.166958	ambiguous	additive	0.283307	0.433648
FBgn0081682	575	448	244	225	570.534	451.236	244.147	225.135	0.000364803	0.64743	0.337102	ambiguous	dominant	0.116956	0.221476
FBgn0075724	36	16	9	8	35.7204	16.1156	9.00541	8.00481	0.0124052	0.918418	0.423654	ambiguous	dominant	0.169925	0.978369
FBgn0071953	44	73	23	18	43.6583	73.5272	23.0138	18.0108	0.0143699	0.677644	0.111059	ambiguous	dominant	0.353637	0.398387
FBgn0250019	70	162	38	48	69.4563	163.17	38.0228	48.0288	4.35957e-09	0.511086	0.0644847	ambiguous	dominant	0.337035	0.895163
FBgn0246839	1538	1149	617	532	1526.05	1157.3	617.371	532.32	1.98955e-12	0.0740744	0.180842	ambiguous	dominant	0.213844	0.185202
FBgn0080713	157	203	81	100	155.781	204.466	81.0487	100.06	0.0265094	0.355221	0.854765	ambiguous	conserved-expression	0.304006	0.0883397
FBgn0077992	133	196	74	87	131.967	197.416	74.0445	87.0523	0.00115165	0.535212	0.396801	ambiguous	conserved-expression	0.23349	0.347568
FBgn0080820	42	20	16	12	41.6738	20.1444	16.0096	12.0072	0.0119756	0.690654	0.547277	ambiguous	conserved-expression	0.415037	0.633721
FBgn0078839	293	375	160	148	290.724	377.708	160.096	148.089	0.002926	0.73894	0.052814	ambiguous	dominant	0.112475	0.265146
FBgn0070948	344	406	156	174	341.328	408.932	156.094	174.105	0.0366877	0.544204	0.753921	ambiguous	dominant	0.157541	0.103161
FBgn0076022	18	6	10	8	17.8602	6.04333	10.006	8.00481	0.0267886	0.821694	0.368817	ambiguous	dominant	0.321928	1.2414
FBgn0244824	37	14	19	6	36.7126	20.0866	19.0114	8.55193	0.0473691	0.16178	0.83496	ambiguous	conserved-expression	1.15254	0.282497
FBgn0248914	44	128	32	50	43.6583	128.924	32.0192	50.03	3.34899e-10	0.158989	0.0883018	ambiguous	additive	0.643856	0.918343
FBgn0249859	16	5	4	1	15.8757	5.03611	4.0024	1.0006	0.0298304	0.378862	0.916304	ambiguous	dominant	2	0.343559
FBgn0074123	350	257	104	101	347.282	258.856	104.062	101.061	0.000679747	0.938974	0.238512	ambiguous	under-dominant	0.0422282	0.381728
FBgn0070136	4412	3880	1784	1730	4377.73	3908.02	1785.07	1731.04	1.82092e-07	0.672206	0.118876	ambiguous	under-dominant	0.0443436	0.119402
FBgn0249393	504	382	276	259	500.086	384.759	276.166	259.156	0.000216457	0.721334	0.181845	ambiguous	dominant	0.0917162	0.286504
FBgn0077089	469	568	182	189	465.357	572.102	182.109	189.114	0.00372606	0.844335	0.329313	ambiguous	under-dominant	0.0544478	0.243486
FBgn0078768	198	110	86	58	196.462	110.794	86.0517	58.0348	2.81351e-06	0.093744	0.584544	ambiguous	dominant	0.568284	0.258082
FBgn0071384	79	136	41	65	78.3864	136.982	41.0246	65.0391	0.00025163	0.0844896	0.823856	ambiguous	conserved-expression	0.664816	0.140497
FBgn0072234	28	51	23	18	27.7825	51.3683	23.0138	18.0108	0.0184705	0.677644	0.0896423	ambiguous	conserved-expression	0.353637	0.533064
FBgn0070440	114	80	34	33	113.115	80.5778	34.0204	33.0198	0.0336391	0.970287	0.470276	ambiguous	dominant	0.0430687	0.446262
FBgn0077277	734	646	289	251	728.299	650.666	289.174	251.151	0.0488574	0.295814	0.880872	ambiguous	under-dominant	0.203382	0.040767
FBgn0075328	142	238	110	126	140.897	239.719	110.066	126.076	2.43134e-06	0.524025	0.0672293	ambiguous	dominant	0.19592	0.570781
FBgn0073815	45	86	15	30	44.6505	86.6211	15.009	30.018	0.000795653	0.101095	0.964323	ambiguous	dominant	1	0.0439576
FBgn0246719	37	66	21	28	36.7126	66.4767	21.0126	28.0168	0.0087013	0.549177	0.584775	ambiguous	conserved-expression	0.415037	0.441534
FBgn0078280	177	116	100	97	175.625	116.838	100.06	97.0583	0.00127919	0.937643	0.123924	ambiguous	dominant	0.0439433	0.54405
FBgn0079288	20	42	16	13	19.8447	42.3033	16.0096	13.0078	0.0103221	0.785313	0.109161	ambiguous	conserved-expression	0.29956	0.79246
FBgn0073182	458	542	230	228	454.443	545.914	230.138	228.137	0.0129697	0.998184	0.215882	ambiguous	dominant	0.0126	0.251976
FBgn0080808	171	262	105	129	169.672	263.892	105.063	129.078	3.21249e-05	0.288377	0.312677	ambiguous	dominant	0.296982	0.340219
FBgn0244954	562	426	264	243	557.635	429.077	264.159	243.146	8.77779e-05	0.618478	0.238337	ambiguous	dominant	0.119582	0.258504
FBgn0072440	291	464	182	217	288.74	467.351	182.109	217.13	9.6349e-10	0.221283	0.0559481	ambiguous	additive	0.253757	0.44098
FBgn0079947	38	17	9	11	37.7049	17.1228	9.00541	11.0066	0.0105559	0.824254	0.165817	ambiguous	dominant	0.289507	0.849327
FBgn0073931	141	103	54	67	139.905	103.744	54.0324	67.0403	0.0349032	0.461729	0.073692	ambiguous	conserved-expression	0.311202	0.120218
FBgn0248322	2664	2336	1060	988	2643.31	2352.87	1060.64	988.594	4.36445e-05	0.332823	0.578073	ambiguous	under-dominant	0.101481	0.0664418
FBgn0079877	185	99	83	63	183.563	99.715	83.0499	63.0379	1.74838e-06	0.277607	0.248836	ambiguous	dominant	0.39776	0.482635
FBgn0243992	108	173	69	83	107.161	174.249	69.0415	83.0499	0.000259449	0.481888	0.296467	ambiguous	dominant	0.266515	0.434856
FBgn0250206	10	29	4	6	9.92233	29.2094	4.0024	6.0036	0.00454782	0.73894	0.569344	ambiguous	dominant	0.584963	0.972721
FBgn0078803	159	237	52	45	157.765	238.712	52.0312	45.027	0.000215042	0.718831	0.053624	ambiguous	under-dominant	0.208587	0.388904
FBgn0079954	58	27	13	16	57.5495	27.195	13.0078	16.0096	0.00208664	0.77352	0.0918142	ambiguous	dominant	0.29956	0.781902
FBgn0078489	451	346	174	181	447.497	348.499	174.105	181.109	0.000874699	0.840903	0.0797179	ambiguous	dominant	0.0569024	0.303822
FBgn0250369	102	40	26	19	101.208	40.2889	26.0156	19.0114	7.57872e-07	0.544458	0.215757	ambiguous	dominant	0.452512	0.876354
FBgn0071646	47	24	30	15	46.635	24.1733	30.018	15.009	0.014607	0.106519	0.96124	ambiguous	dominant	1	0.0520044
FBgn0247536	109	57	81	61	108.153	57.4117	81.0487	61.0366	0.000195438	0.268592	0.291434	ambiguous	dominant	0.409113	0.504551
FBgn0074848	1948	2146	787	774	1932.87	2161.5	787.473	774.465	0.00244454	0.915151	0.0976297	ambiguous	under-dominant	0.0240301	0.137257
FBgn0081245	472	563	285	316	468.334	567.066	285.171	316.19	0.00791029	0.410668	0.587234	ambiguous	dominant	0.148963	0.127016
FBgn0071601	175	231	105	120	173.641	232.668	105.063	120.072	0.0102268	0.543534	0.538087	ambiguous	dominant	0.192645	0.229524
FBgn0076612	2761	2572	1263	1223	2739.56	2590.58	1263.76	1223.73	0.0395965	0.717836	0.779731	ambiguous	dominant	0.0464302	0.0342393
FBgn0077332	58	32	18	19	57.5495	32.2311	18.0108	19.0114	0.0145337	0.938974	0.248743	ambiguous	conserved-expression	0.0780025	0.758348
FBgn0081140	22	4	12	10	21.8291	4.02889	12.0072	10.006	0.000692962	0.839584	0.0764211	ambiguous	dominant	0.263034	2.17477
FBgn0081068	341	244	203	162	338.352	245.762	203.122	162.097	0.000278554	0.135858	0.671003	ambiguous	dominant	0.325486	0.135774
FBgn0247759	176	266	63	65	174.633	267.921	63.0379	65.0391	4.7683e-05	0.929703	0.140381	ambiguous	under-dominant	0.0450879	0.572394
FBgn0074683	1108	1261	434	442	1099.39	1270.11	434.261	442.266	0.00248635	0.877998	0.252379	ambiguous	under-dominant	0.0263513	0.18189
FBgn0071441	335	262	114	118	332.398	263.892	114.068	118.071	0.00886556	0.891235	0.211978	ambiguous	dominant	0.049753	0.283211
FBgn0070122	143	186	51	58	141.889	187.343	51.0306	58.0348	0.0304962	0.716525	0.684634	ambiguous	dominant	0.185556	0.215363
FBgn0245034	86	56	34	34	85.3321	56.4044	34.0204	34.0204	0.0271052	0.998184	0.328761	ambiguous	conserved-expression	0	0.597279
FBgn0081994	88	30	28	22	87.3165	30.2167	28.0168	22.0132	3.12369e-07	0.645602	0.073607	ambiguous	dominant	0.347923	1.18299
FBgn0244456	828	679	413	388	821.569	683.904	413.248	388.233	0.000658446	0.651828	0.334346	ambiguous	dominant	0.0900851	0.174503
FBgn0072506	88	133	57	60	87.3165	133.961	57.0342	60.036	0.00511913	0.88968	0.238351	ambiguous	conserved-expression	0.0740006	0.543481
FBgn0082069	251	310	143	142	249.051	312.239	143.086	142.085	0.021557	0.998184	0.25065	ambiguous	conserved-expression	0.0101242	0.316087
FBgn0070495	127	80	56	43	126.014	80.5778	56.0336	43.0258	0.00328802	0.422591	0.651008	ambiguous	conserved-expression	0.38109	0.264036
FBgn0079738	113	77	48	35	112.122	77.5561	48.0288	35.021	0.0218805	0.36859	0.916304	ambiguous	conserved-expression	0.455679	0.0760822
FBgn0076544	72	43	22	18	71.4408	43.3106	22.0132	18.0108	0.0164527	0.748627	0.613258	ambiguous	dominant	0.289507	0.432523
FBgn0079728	118	224	59	70	117.084	225.618	59.0354	70.0421	3.08388e-08	0.560031	0.074737	ambiguous	dominant	0.24664	0.699703
FBgn0071181	575	714	333	396	570.534	719.157	333.2	396.238	0.000214745	0.0797107	0.707444	ambiguous	dominant	0.249978	0.0840146
FBgn0244229	108	66	50	42	107.161	66.4767	50.03	42.0252	0.00419467	0.654047	0.434813	ambiguous	conserved-expression	0.251539	0.437324
FBgn0246463	285	211	77	74	282.787	212.524	77.0463	74.0445	0.00308459	0.923822	0.359737	ambiguous	under-dominant	0.0573332	0.354755
FBgn0075647	133	96	52	54	131.967	96.6933	52.0312	54.0324	0.0337413	0.923822	0.294788	ambiguous	conserved-expression	0.0544478	0.394241
FBgn0244644	52	20	14	14	51.5961	20.1444	14.0084	14.0084	0.000445208	0.998184	0.120625	ambiguous	dominant	0	1.35688
FBgn0075812	126	84	36	24	125.021	84.6067	36.0216	24.0144	0.0101469	0.314001	0.979994	ambiguous	dominant	0.584963	0.0216307
FBgn0244696	28	7	8	6	27.7825	7.05056	8.00481	6.0036	0.000783808	0.791586	0.258188	ambiguous	conserved-expression	0.415037	1.56333
FBgn0248437	484	378	170	178	480.241	380.73	170.102	178.107	0.00130434	0.81879	0.0923578	ambiguous	dominant	0.0663425	0.268648
FBgn0073376	22	9	4	1	21.8291	9.065	4.0024	1.0006	0.0374549	0.378862	0.800638	ambiguous	dominant	2	0.732124
FBgn0070538	574	474	238	197	569.542	477.423	238.143	197.118	0.00719992	0.184094	0.954633	ambiguous	dominant	0.272766	0.018233
FBgn0246350	105	61	39	44	104.185	61.3691	39.0234	43.9752	0.0019135	0.775913	0.0618876	ambiguous	conserved-expression	0.17235	0.591207
FBgn0079014	1150	975	562	497	1141.07	982.042	562.338	497.299	0.000843658	0.18278	0.842328	ambiguous	conserved-expression	0.177324	0.0392047
FBgn0082134	550	462	226	191	545.728	465.337	226.136	191.115	0.017626	0.263232	0.967869	ambiguous	dominant	0.24275	0.0128421
FBgn0075209	1296	1107	707	680	1285.93	1115	707.425	680.409	0.000707827	0.73894	0.274546	ambiguous	dominant	0.0561755	0.149604
FBgn0078082	958	1116	628	625	950.56	1124.06	628.377	625.376	0.0008498	0.998184	0.0597222	ambiguous	over-dominant	0.00690837	0.234962
FBgn0246619	84	139	56	64	83.3476	131.474	56.0336	60.1369	0.00318528	0.844798	0.221172	ambiguous	dominant	0.101958	0.555609
FBgn0081742	785	981	341	358	778.903	988.085	341.205	358.215	6.42029e-06	0.712074	0.10717	ambiguous	dominant	0.0701878	0.273003
FBgn0074609	186	241	68	68	184.555	242.741	68.0409	68.0409	0.0141302	0.998184	0.331207	ambiguous	under-dominant	0	0.395361
FBgn0247141	462	562	227	220	458.412	566.059	227.136	220.132	0.00318171	0.895995	0.102819	ambiguous	dominant	0.0451888	0.259119
FBgn0078010	620	528	356	338	615.185	531.813	356.214	338.203	0.0204967	0.746385	0.527595	ambiguous	dominant	0.074854	0.135246
FBgn0077832	62	33	17	10	61.5185	33.2383	17.0102	10.006	0.00743297	0.397752	0.921752	ambiguous	dominant	0.765535	0.122637
FBgn0073497	62	90	33	43	61.5185	90.65	33.0198	43.0258	0.0404037	0.479151	0.807948	ambiguous	conserved-expression	0.381871	0.177417
FBgn0081852	12	28	5	3	11.9068	28.2022	5.003	3.0018	0.0210539	0.710171	0.20524	ambiguous	dominant	0.736966	0.507058
FBgn0246661	1351	1616	699	776	1340.51	1627.23	699.42	776.256	2.03432e-06	0.141202	0.325541	ambiguous	additive	0.150374	0.129266
FBgn0077609	112	68	58	40	111.13	68.4911	58.0348	40.024	0.00309147	0.220248	0.804507	ambiguous	dominant	0.536053	0.162208
FBgn0247415	808	607	463	421	801.725	614.687	463.278	423.529	1.42698e-06	0.430441	0.121348	ambiguous	dominant	0.129418	0.253836
FBgn0080526	85	57	34	26	84.3398	57.4117	34.0204	26.0156	0.0408003	0.549177	0.836183	ambiguous	conserved-expression	0.387023	0.167847
FBgn0077864	1158	992	524	508	1149.01	999.164	524.315	508.305	0.00179361	0.835751	0.312677	ambiguous	dominant	0.0447383	0.156854
FBgn0244970	82	128	42	40	81.3631	128.924	42.0252	40.024	0.00321559	0.930062	0.145031	ambiguous	dominant	0.0703893	0.593689
FBgn0070499	1087	890	638	613	1078.56	896.428	638.383	613.368	7.02459e-05	0.744527	0.130451	ambiguous	over-dominant	0.0576694	0.209175
FBgn0078991	57	15	22	10	56.5573	15.1083	22.0132	10.006	1.74955e-06	0.128694	0.462713	ambiguous	additive	1.1375	0.766865
FBgn0082057	535	609	305	300	530.845	613.398	305.183	300.18	0.0414263	0.951009	0.25012	ambiguous	conserved-expression	0.0238467	0.184687
FBgn0073053	811	639	370	330	804.701	643.615	370.222	330.198	4.41101e-05	0.350592	0.425672	ambiguous	dominant	0.165059	0.157196
FBgn0250416	24	6	6	3	23.8136	6.04333	6.0036	3.0018	0.0019941	0.555742	0.620068	ambiguous	dominant	1	0.978369
FBgn0081961	882	1030	459	466	875.15	1037.44	459.276	466.28	0.0011741	0.891235	0.147169	ambiguous	dominant	0.0218358	0.223589
FBgn0076604	252	385	151	170	250.043	387.781	151.091	170.102	3.97777e-07	0.510983	0.0724332	ambiguous	additive	0.170986	0.462079
FBgn0244253	24	44	24	42	23.8136	44.3178	24.0144	42.0252	0.0280508	0.105576	0.927616	ambiguous	dominant	0.807355	0.0887449
FBgn0246147	12	33	6	13	11.9068	33.2383	6.0036	13.0078	0.00346901	0.27623	0.813296	ambiguous	conserved-expression	1.11548	0.365585
FBgn0075152	159	265	73	79	157.765	266.914	73.0439	79.0475	7.82387e-07	0.798782	0.0694093	ambiguous	dominant	0.113956	0.64464
FBgn0079775	420	318	192	165	416.738	320.297	192.115	165.099	0.000758919	0.377297	0.584544	ambiguous	conserved-expression	0.21864	0.161092
FBgn0075598	219	154	90	85	217.299	155.112	90.0541	85.0511	0.00258287	0.87167	0.280638	ambiguous	conserved-expression	0.0824622	0.403908
FBgn0076392	959	820	334	337	951.552	825.922	334.201	337.202	0.00427428	0.940893	0.228987	ambiguous	under-dominant	0.0129005	0.191376
FBgn0071370	69	113	47	53	68.4641	113.816	47.0282	53.0318	0.00243722	0.747871	0.273678	ambiguous	dominant	0.173332	0.559954
FBgn0074371	27	50	7	20	26.7903	50.3611	7.00421	20.012	0.0169194	0.0558272	0.589726	ambiguous	dominant	1.51457	0.603974
FBgn0076829	213	262	112	114	211.346	263.892	112.067	114.068	0.0397746	0.94382	0.385979	ambiguous	conserved-expression	0.0255351	0.294809
FBgn0081585	21	6	15	6	20.8369	6.04333	15.009	6.0036	0.00767101	0.165722	0.783321	ambiguous	dominant	1.32193	0.463796
FBgn0080224	1064	905	541	517	1055.74	911.536	541.325	517.311	0.00173243	0.728295	0.354883	ambiguous	dominant	0.0654643	0.146413
FBgn0077031	193	266	139	178	191.501	267.921	139.084	178.107	0.0014037	0.108722	0.722728	ambiguous	dominant	0.356792	0.127664
FBgn0248884	30	50	18	17	29.767	50.3611	18.0108	17.0102	0.0444916	0.947142	0.316911	ambiguous	conserved-expression	0.0824622	0.676134
FBgn0079562	124	170	84	85	123.037	171.228	84.0505	85.0511	0.0137308	0.969537	0.235388	ambiguous	dominant	0.0170735	0.459752
XLOC_003295	58	36	27	21	57.5495	36.26	27.0162	21.0126	0.047992	0.637383	0.730943	ambiguous	conserved-expression	0.36257	0.303855
FBgn0250229	196	271	172	175	194.478	272.957	172.103	175.105	0.00112529	0.929421	0.0807765	ambiguous	over-dominant	0.0249464	0.464124
FBgn0077939	192	265	139	177	190.509	266.914	139.084	177.106	0.00136887	0.119688	0.696808	ambiguous	dominant	0.348664	0.137852
FBgn0070370	483	617	288	302	479.249	621.456	288.173	302.181	0.000112394	0.744527	0.114801	ambiguous	dominant	0.0684797	0.306398
FBgn0247286	224	160	57	61	222.26	161.156	57.0342	61.0366	0.00356916	0.853392	0.171108	ambiguous	under-dominant	0.0978473	0.365949
FBgn0077417	8162	7758	3482	3502	8098.61	7814.03	3484.09	3504.1	0.0134419	0.83678	0.308869	ambiguous	under-dominant	0.00826288	0.0433443
FBgn0080252	736	583	305	280	730.284	587.211	305.183	280.168	0.000151712	0.567829	0.354665	ambiguous	dominant	0.123382	0.191197
FBgn0077905	2079	1859	984	952	2062.85	1872.43	984.591	952.572	0.00277736	0.744527	0.439316	ambiguous	conserved-expression	0.0476967	0.0920355
FBgn0243943	101	61	54	59	100.216	61.4406	54.0324	59.0354	0.00473472	0.808816	0.0693533	ambiguous	dominant	0.127756	0.578088
FBgn0075520	430	529	218	229	426.66	532.821	218.131	229.138	0.00255833	0.774218	0.285348	ambiguous	dominant	0.0710195	0.249542
FBgn0076870	609	868	338	398	604.27	874.269	338.203	398.239	4.49141e-11	0.101007	0.0799646	ambiguous	additive	0.235745	0.297138
FBgn0070579	157	210	88	103	155.781	211.517	88.0529	103.062	0.0106875	0.50286	0.602234	ambiguous	conserved-expression	0.227069	0.214187
FBgn0244262	80	53	33	20	79.3787	53.3828	33.0198	20.012	0.0414109	0.227432	0.865805	ambiguous	dominant	0.722466	0.150089
FBgn0078019	1319	1182	426	432	1308.76	1190.54	426.256	432.26	0.0223347	0.902294	0.336933	ambiguous	under-dominant	0.0201779	0.116406
FBgn0079191	889	749	475	426	882.095	754.409	475.285	426.256	0.00248505	0.303382	0.737333	ambiguous	dominant	0.157074	0.0685129
FBgn0244955	741	647	294	322	735.245	651.673	294.177	322.193	0.0341694	0.472615	0.0927833	ambiguous	dominant	0.131245	0.0428326
FBgn0263068	19	5	5	1	18.8524	5.03611	5.003	1.0006	0.00810939	0.251146	0.893604	ambiguous	dominant	2.32193	0.417559
FBgn0072446	727	570	290	260	721.354	574.117	290.174	260.156	8.27163e-05	0.451801	0.432172	ambiguous	dominant	0.157541	0.171821
FBgn0070302	114	67	48	49	113.115	67.4839	48.0288	49.0294	0.00151718	0.96195	0.106878	ambiguous	dominant	0.0297473	0.715423
FBgn0078258	50	76	29	26	49.6117	76.5489	29.0174	26.0156	0.0365715	0.855883	0.226349	ambiguous	conserved-expression	0.157541	0.468161
FBgn0246322	4	36	2	2	3.96893	36.26	2.0012	2.0012	2.83903e-07	0.998184	0.161316	ambiguous	dominant	0	3.19156
FBgn0077122	220	292	111	113	218.291	294.109	111.067	113.068	0.00293518	0.943573	0.201687	ambiguous	dominant	0.0257631	0.404332
FBgn0070637	741	543	202	170	735.245	546.922	202.121	170.102	3.32934e-07	0.282935	0.493192	ambiguous	under-dominant	0.248821	0.17807
FBgn0077698	1205	1358	704	722	1195.64	1367.81	704.423	722.434	0.00358639	0.777546	0.231852	ambiguous	dominant	0.0364234	0.157658
FBgn0247897	39	62	11	8	38.6971	62.4478	11.0066	8.00481	0.0392238	0.722514	0.256886	ambiguous	under-dominant	0.459432	0.230993
FBgn0077987	507	578	284	336	503.062	582.174	284.171	336.202	0.0450673	0.126446	0.906231	ambiguous	dominant	0.24257	0.0318558
FBgn0076553	145	223	72	78	143.874	224.611	72.0433	78.0469	0.000119125	0.796937	0.163638	ambiguous	dominant	0.115477	0.527144
FBgn0080993	188	246	111	100	186.54	247.777	111.067	100.06	0.010021	0.701823	0.073692	ambiguous	conserved-expression	0.15056	0.258997
XLOC_003002	31	11	7	8	30.7592	11.0794	7.00421	8.00481	0.00453586	0.902294	0.166676	ambiguous	dominant	0.192645	1.28049
FBgn0071436	106	186	61	77	105.177	187.343	61.0366	77.0463	7.985e-06	0.376358	0.238452	ambiguous	dominant	0.336049	0.49682
FBgn0246030	644	503	159	162	638.998	506.633	159.096	162.097	0.000178509	0.927002	0.134927	ambiguous	under-dominant	0.026967	0.307905
FBgn0078617	56	25	26	14	55.5651	25.1806	26.0156	14.0084	0.00155953	0.190376	0.813409	ambiguous	conserved-expression	0.893085	0.248783
FBgn0074069	57	31	22	29	56.5573	31.2239	22.0132	29.0174	0.0132928	0.558619	0.055189	ambiguous	conserved-expression	0.398549	0.458514
FBgn0071438	1485	1287	747	753	1473.47	1296.3	747.449	753.452	0.00104152	0.915471	0.104999	ambiguous	dominant	0.0115416	0.173279
FBgn0077555	627	446	282	248	622.13	449.221	282.169	248.149	3.11008e-07	0.361713	0.170881	ambiguous	additive	0.185355	0.284436
FBgn0247688	319	376	215	234	316.522	378.716	215.129	234.141	0.0468574	0.589469	0.626873	ambiguous	over-dominant	0.122172	0.136635
FBgn0075862	104	180	89	105	103.192	181.3	89.0535	105.063	1.79155e-05	0.474403	0.109624	ambiguous	dominant	0.238512	0.574532
FBgn0077624	643	734	280	325	638.006	739.301	280.168	325.195	0.0211212	0.194422	0.992785	ambiguous	dominant	0.215013	0.00242084
FBgn0075166	177	85	74	52	175.625	85.6139	74.0445	52.0312	7.29552e-08	0.178232	0.239372	ambiguous	additive	0.509014	0.52757
FBgn0245121	84	47	30	22	83.3476	47.3394	30.018	22.0132	0.00345228	0.513959	0.636174	ambiguous	dominant	0.447459	0.368639
FBgn0075128	1617	1346	835	745	1604.44	1355.72	835.502	745.448	7.29678e-06	0.120186	0.580493	ambiguous	dominant	0.164536	0.0784748
FBgn0075198	148	96	59	51	146.851	96.6933	59.0354	51.0306	0.00275285	0.694305	0.428791	ambiguous	dominant	0.210218	0.392642
FBgn0246939	169	117	65	70	167.687	120.184	65.0391	71.4325	0.00969573	0.772822	0.122699	ambiguous	conserved-expression	0.135274	0.345252
FBgn0071378	304	408	199	225	301.639	410.947	199.12	225.135	0.000217692	0.414954	0.284411	ambiguous	dominant	0.177157	0.268972
FBgn0080183	349	472	130	141	346.289	475.409	130.078	141.085	4.16665e-05	0.710171	0.224762	ambiguous	under-dominant	0.117184	0.340007
FBgn0079204	69	37	26	18	68.4641	37.2672	26.0156	18.0108	0.00499954	0.468021	0.694244	ambiguous	dominant	0.530515	0.346926
FBgn0076903	84	38	50	44	83.3476	38.2744	50.03	44.0264	0.000104658	0.760151	0.0744818	ambiguous	dominant	0.184425	0.938335
FBgn0072928	365	270	205	160	362.165	274.288	205.123	161.473	0.00099645	0.107393	0.874916	ambiguous	dominant	0.345201	0.0557543
FBgn0263057	474	376	132	126	470.319	378.716	132.079	126.076	0.00297972	0.8771	0.418766	ambiguous	under-dominant	0.0671142	0.245409
FBgn0081492	417	577	241	277	413.761	581.167	241.145	277.166	1.00736e-06	0.276893	0.173175	ambiguous	dominant	0.200853	0.289302
FBgn0244928	142	92	82	76	140.897	92.6644	82.0493	76.0457	0.00332128	0.827082	0.232043	ambiguous	dominant	0.109624	0.49493
FBgn0079436	40	76	32	29	39.6893	76.5489	32.0192	29.0174	0.00185413	0.863606	0.067315	ambiguous	conserved-expression	0.142019	0.805611
FBgn0077637	150	208	87	94	148.835	209.502	87.0523	94.0565	0.00440586	0.782728	0.310264	ambiguous	conserved-expression	0.111645	0.381606
FBgn0071211	238	173	83	74	236.152	174.249	83.0499	74.0445	0.00436311	0.717875	0.512582	ambiguous	dominant	0.165586	0.272973
FBgn0248865	358	245	163	148	355.22	246.769	163.098	148.089	2.39874e-05	0.654863	0.153735	ambiguous	dominant	0.139275	0.386272
FBgn0070415	197	250	112	122	195.47	251.806	112.067	122.073	0.021141	0.719262	0.496113	ambiguous	conserved-expression	0.123382	0.241981
FBgn0247486	12	48	2	8	11.9068	48.3467	2.0012	8.00481	6.00882e-06	0.169205	0.992785	ambiguous	dominant	2	0.0216307
FBgn0074019	7	20	0	4	6.94563	20.1444	1	4.0024	0.0218805	0.375137	0.884845	ambiguous	dominant	2.00087	0.464663
FBgn0077564	2820	2583	1603	1657	2798.1	2601.66	1603.96	1658	0.00746267	0.525296	0.0622723	ambiguous	over-dominant	0.0477992	0.0572176
FBgn0080769	196	251	133	129	194.478	252.813	133.08	129.078	0.0165561	0.926186	0.161316	ambiguous	dominant	0.0440552	0.334409
FBgn0245069	996	850	334	323	988.264	856.139	334.201	323.194	0.00311211	0.860885	0.411484	ambiguous	under-dominant	0.0483139	0.158738
FBgn0072007	247	372	92	108	245.082	374.687	92.0553	108.065	1.41067e-06	0.481921	0.247813	ambiguous	dominant	0.231326	0.381097
FBgn0072070	67	153	32	55	66.4796	154.105	32.0192	55.033	1.91738e-08	0.0642567	0.456651	ambiguous	dominant	0.78136	0.43157
FBgn0248386	199	155	44	48	197.454	156.119	44.0264	48.0288	0.0448966	0.83095	0.336735	ambiguous	under-dominant	0.125531	0.213339
FBgn0075557	970	1114	722	720	962.466	1122.05	722.434	720.433	0.00248505	0.998184	0.0775103	ambiguous	over-dominant	0.00400193	0.217321
FBgn0249001	66	39	44	30	65.4874	39.079	44.0264	29.8632	0.0184705	0.276841	0.817323	ambiguous	dominant	0.560003	0.18482
FBgn0076656	53	95	27	32	52.5884	95.6861	27.0162	32.0192	0.00127519	0.72749	0.339022	ambiguous	dominant	0.245112	0.618453
FBgn0075431	554	635	260	250	549.697	639.586	260.156	250.15	0.0279994	0.853101	0.184296	ambiguous	dominant	0.0565835	0.161918
FBgn0070973	2444	2707	780	878	2425.02	2726.55	780.469	878.528	0.000293514	0.0647526	0.992134	ambiguous	under-dominant	0.170747	0.00166549
FBgn0080633	49	94	24	36	48.6194	94.6789	24.0144	36.0216	0.000405145	0.301063	0.605409	ambiguous	dominant	0.584963	0.376547
FBgn0243531	95	147	69	76	94.2622	148.062	69.0415	76.0457	0.00183537	0.754928	0.225041	ambiguous	dominant	0.139403	0.512044
FBgn0072886	1168	998	645	571	1158.93	1005.21	645.388	571.343	0.0014037	0.151714	0.878356	ambiguous	dominant	0.175808	0.0294894
FBgn0077294	831	626	425	394	824.546	630.521	425.255	394.237	7.86977e-07	0.549177	0.0908823	ambiguous	dominant	0.109267	0.277788
FBgn0080778	174	125	61	41	172.649	125.903	61.0366	41.0246	0.0126334	0.170712	0.847154	ambiguous	dominant	0.573185	0.117657
FBgn0081284	1000	877	454	411	992.233	883.334	454.273	411.247	0.0162527	0.373837	0.913356	ambiguous	dominant	0.143554	0.0241666
FBgn0079912	90	132	46	39	89.301	132.953	46.0276	39.0234	0.00953729	0.694408	0.0910154	ambiguous	dominant	0.23816	0.336012
FBgn0070232	1148	1301	514	561	1139.08	1310.4	514.309	561.337	0.00291912	0.325941	0.661059	ambiguous	dominant	0.126232	0.0758966
FBgn0247712	562	730	192	202	557.635	735.272	192.115	202.121	6.73005e-06	0.784631	0.142498	ambiguous	under-dominant	0.073249	0.325708
FBgn0071831	220	162	126	100	218.291	164.984	126.076	101.172	0.0117714	0.281988	0.844996	ambiguous	dominant	0.317476	0.0864553
FBgn0073948	127	190	56	60	126.014	191.372	56.0336	60.036	0.000914607	0.851432	0.251663	ambiguous	dominant	0.0995357	0.503266
FBgn0081885	18	47	18	18	17.8602	47.3394	18.0108	18.0108	0.00069972	0.998184	0.0806125	ambiguous	dominant	0	1.40629
FBgn0070156	17	4	7	7	16.868	4.02889	7.00421	7.00421	0.00825552	0.998184	0.152285	ambiguous	dominant	0	2.06583
FBgn0246244	141	56	41	33	139.905	56.4044	41.0246	33.0198	6.38824e-09	0.604992	0.0551673	ambiguous	dominant	0.313158	0.997408
FBgn0075135	331	396	131	128	328.429	398.86	131.079	128.077	0.0256658	0.949872	0.287435	ambiguous	under-dominant	0.033423	0.246877
FBgn0076060	59	107	33	32	58.5418	107.773	33.0198	32.0192	0.00046933	0.969299	0.0970249	ambiguous	dominant	0.0443941	0.836061
FBgn0246933	17	5	4	4	16.868	5.03611	4.0024	4.0024	0.0195208	0.998184	0.329242	ambiguous	conserved-expression	0	1.7439
FBgn0249272	217	154	131	99	215.315	155.112	131.079	99.0595	0.00349746	0.142708	0.879513	ambiguous	dominant	0.404066	0.0690676
FBgn0073582	665	752	243	258	659.835	757.431	243.146	258.155	0.0299304	0.704537	0.643517	ambiguous	under-dominant	0.0864148	0.112594
FBgn0079744	578	498	205	206	573.511	501.597	205.123	206.124	0.0401347	0.972525	0.417605	ambiguous	under-dominant	0.00702043	0.186273
FBgn0075019	9	32	3	5	8.9301	32.2311	3.0018	5.003	0.000624889	0.704625	0.557802	ambiguous	dominant	0.736966	1.11474
FBgn0079175	537	438	266	221	532.829	441.163	266.16	221.133	0.00557084	0.165116	0.988228	ambiguous	conserved-expression	0.26738	0.00498062
FBgn0078579	44	16	24	20	43.6583	16.1156	24.0144	20.012	0.000768261	0.76368	0.142745	ambiguous	dominant	0.263034	1.17477
FBgn0244084	7	20	8	14	6.94563	20.1444	8.00481	14.0084	0.0218805	0.419801	0.610658	ambiguous	dominant	0.807355	0.728849
FBgn0074647	92	149	47	61	91.2855	150.076	47.0282	61.0366	0.000570494	0.384517	0.51269	ambiguous	dominant	0.376148	0.341089
FBgn0078320	1743	1886	703	772	1729.46	1899.62	703.422	772.464	0.0209259	0.1953	0.998519	ambiguous	under-dominant	0.135076	0.000311674
FBgn0070965	219	273	161	166	217.299	274.972	161.097	166.1	0.0251534	0.88449	0.313795	ambiguous	dominant	0.0441226	0.295478
FBgn0071598	7	22	3	8	6.94563	22.1589	3.0018	8.00481	0.00975546	0.311823	0.90566	ambiguous	conserved-expression	1.41504	0.25867
FBgn0076143	1087	1437	496	568	1078.56	1447.38	496.298	568.341	7.19038e-12	0.0996565	0.0977287	ambiguous	dominant	0.195551	0.228788
FBgn0263300	154	77	90	61	152.804	77.5561	90.0541	61.0366	1.94289e-06	0.0887532	0.352964	ambiguous	dominant	0.561116	0.417254
FBgn0076747	137	190	70	78	135.936	191.372	70.0421	78.0469	0.00670156	0.720797	0.429536	ambiguous	dominant	0.156119	0.337335
FBgn0074065	227	160	108	100	225.237	161.156	108.065	100.06	0.00227216	0.794288	0.290414	ambiguous	dominant	0.111031	0.371958
FBgn0074930	225	316	151	161	223.253	318.282	151.091	161.097	0.000214078	0.756407	0.124082	ambiguous	dominant	0.0925121	0.419118
FBgn0070709	80	51	47	29	79.3787	51.3683	47.0282	29.0174	0.025888	0.149393	0.932846	ambiguous	conserved-expression	0.696608	0.0687358
FBgn0071476	233	347	170	196	231.19	349.506	170.102	196.118	5.97364e-06	0.371995	0.129005	ambiguous	dominant	0.205319	0.390918
FBgn0248106	7188	7695	3260	3339	7132.17	7750.58	3261.96	3341.01	1.80214e-05	0.484943	0.130772	ambiguous	under-dominant	0.0345441	0.0854175
FBgn0072249	16	56	12	21	15.8757	56.4044	12.0072	21.0126	4.8442e-06	0.293802	0.277966	ambiguous	additive	0.807355	1.02163
FBgn0244835	36	7	17	11	35.7204	7.05056	17.0102	11.0066	1.68942e-05	0.49745	0.101745	ambiguous	dominant	0.628031	1.71291
FBgn0078824	323	399	217	227	320.491	401.882	217.13	227.136	0.00833403	0.795405	0.287937	ambiguous	dominant	0.0649973	0.261488
FBgn0078995	26	6	10	6	25.7981	6.04333	10.006	6.0036	0.000786098	0.558619	0.33766	ambiguous	conserved-expression	0.736966	1.35688
FBgn0243810	22	6	2	4	21.8291	6.04333	2.0012	4.0024	0.00493186	0.64743	0.109557	ambiguous	dominant	1	0.852838
FBgn0246035	14	29	5	3	13.8913	29.2094	5.003	3.0018	0.0392125	0.710171	0.250796	ambiguous	dominant	0.736966	0.335291
FBgn0070063	368	434	133	163	365.142	437.134	133.08	163.098	0.030925	0.226695	0.927417	ambiguous	under-dominant	0.293446	0.0338257
FBgn0078340	1338	1114	678	622	1327.61	1122.05	678.407	622.374	5.1286e-05	0.340704	0.419548	ambiguous	dominant	0.124371	0.118327
FBgn0072462	473	383	168	179	469.326	385.766	168.101	179.108	0.00722452	0.744527	0.122898	ambiguous	dominant	0.0914984	0.191367
FBgn0249175	1689	2059	991	1100	1675.88	2073.87	991.595	1100.66	2.4868e-09	0.0661248	0.13451	ambiguous	dominant	0.150547	0.156859
FBgn0262662	344	280	127	113	341.328	279.666	127.076	112.123	0.0216785	0.594085	0.780764	ambiguous	dominant	0.180609	0.106845
FBgn0078820	512	657	316	360	508.023	661.745	316.19	360.216	4.80795e-05	0.235425	0.334538	ambiguous	dominant	0.188072	0.193308
FBgn0073302	286	205	191	170	283.779	206.481	191.115	170.102	0.00100622	0.529911	0.309323	ambiguous	over-dominant	0.168038	0.290723
XLOC_014588	163	81	61	39	161.734	81.585	61.0366	39.0234	7.7597e-07	0.118569	0.532729	ambiguous	dominant	0.645335	0.341912
FBgn0070430	498	367	310	298	494.132	369.651	310.186	298.179	4.96976e-05	0.832906	0.0661302	ambiguous	over-dominant	0.0569559	0.361779
FBgn0071572	61	70	43	24	60.5262	113.147	43.0258	38.5381	0.000240011	0.815152	0.0631075	ambiguous	conserved-expression	0.158917	0.743644
FBgn0078864	238	172	130	116	236.152	173.242	130.078	116.07	0.00367774	0.634225	0.412788	ambiguous	dominant	0.164387	0.282535
FBgn0072301	3119	2572	1491	1396	3094.78	2590.58	1491.9	1396.84	2.25923e-11	0.270283	0.0545429	ambiguous	additive	0.0949813	0.161581
FBgn0077171	436	309	185	168	432.614	311.232	185.111	168.101	2.0185e-05	0.630654	0.186698	ambiguous	dominant	0.139064	0.336027
FBgn0077784	572	482	206	195	567.557	485.481	206.124	195.117	0.017462	0.802692	0.584483	ambiguous	under-dominant	0.0791702	0.146181
FBgn0075322	202	138	130	114	200.431	138.997	130.078	114.068	0.00179823	0.562032	0.331337	ambiguous	dominant	0.189478	0.338579
FBgn0081203	935	1069	384	388	927.738	1076.72	384.231	388.233	0.00419861	0.927886	0.238337	ambiguous	under-dominant	0.0149503	0.199904
FBgn0247851	477	323	142	131	473.295	325.333	142.085	131.079	4.27391e-07	0.744527	0.112244	ambiguous	dominant	0.116324	0.4245
FBgn0248912	1503	1684	713	692	1491.33	1696.16	713.428	692.416	0.00184673	0.815057	0.0510784	ambiguous	dominant	0.04313	0.142548
FBgn0249114	282	224	177	194	279.81	225.618	177.106	194.117	0.0260568	0.598506	0.0835101	ambiguous	over-dominant	0.132307	0.178258
FBgn0078686	94	160	72	92	93.2699	161.156	72.0433	92.0553	8.8804e-05	0.292897	0.296182	ambiguous	dominant	0.353637	0.435333
FBgn0071094	208	154	64	78	206.385	155.112	64.0385	78.0469	0.0127384	0.464505	0.0560659	ambiguous	dominant	0.285402	0.12662
FBgn0079966	2044	1817	977	962	2028.12	1830.12	977.587	962.578	0.00169541	0.913887	0.262588	ambiguous	conserved-expression	0.0223217	0.125884
FBgn0243947	101	68	48	53	100.216	68.4911	48.0288	53.0318	0.0260921	0.79589	0.155844	ambiguous	dominant	0.142958	0.40616
FBgn0244921	362	294	180	152	359.188	296.123	180.108	152.091	0.0221293	0.32991	0.925192	ambiguous	conserved-expression	0.243926	0.0346172
FBgn0078165	1214	1030	528	484	1204.57	1038.35	528.317	484.717	0.000671464	0.419409	0.604428	ambiguous	dominant	0.124261	0.0899625
FBgn0070601	468	383	278	221	464.365	385.766	278.167	221.133	0.0115081	0.0638361	0.829087	ambiguous	dominant	0.331039	0.0635051
FBgn0244205	191	141	67	68	189.517	142.018	67.0403	68.0409	0.016313	0.966575	0.294011	ambiguous	dominant	0.0213737	0.394873
FBgn0072650	123	88	51	50	122.045	88.6356	51.0306	50.03	0.0365558	0.981923	0.398985	ambiguous	conserved-expression	0.0285692	0.432883
FBgn0081778	1321	1577	453	528	1310.74	1588.39	453.272	528.317	3.40183e-06	0.0692521	0.761514	ambiguous	under-dominant	0.221027	0.056156
FBgn0244291	130	89	57	51	128.99	89.6428	57.0342	51.0306	0.0145643	0.780698	0.480932	ambiguous	conserved-expression	0.160465	0.364539
FBgn0244075	1048	874	235	253	1039.86	880.312	235.141	253.152	0.000435023	0.630654	0.0645455	ambiguous	under-dominant	0.106477	0.133826
FBgn0244958	209	259	69	84	207.377	260.871	69.0415	84.0505	0.0343301	0.444646	0.926346	ambiguous	under-dominant	0.283793	0.0472869
FBgn0246765	940	1187	348	403	932.699	1195.57	348.209	403.242	1.80389e-07	0.145638	0.420259	ambiguous	under-dominant	0.211693	0.146525
FBgn0080131	3820	3478	1841	1705	3790.33	3503.12	1842.11	1706.02	0.000663279	0.124879	0.979994	ambiguous	dominant	0.110718	0.00296609
FBgn0248835	1355	1197	817	800	1344.48	1205.65	817.491	800.481	0.00779199	0.879409	0.333225	ambiguous	over-dominant	0.0303361	0.126903
FBgn0075156	118	80	28	23	117.084	80.5778	28.0168	23.0138	0.0174307	0.720771	0.744483	ambiguous	under-dominant	0.283793	0.255291
FBgn0071054	18	116	5	8	17.8602	116.838	5.003	8.00481	3.79522e-18	0.640708	0.103656	ambiguous	dominant	0.678072	2.03161
FBgn0250642	11	25	7	5	10.9146	25.1806	7.00421	5.003	0.034776	0.772822	0.208932	ambiguous	conserved-expression	0.485427	0.720628
FBgn0078291	35	18	10	11	34.7282	18.13	10.006	11.0066	0.0394531	0.920009	0.316134	ambiguous	conserved-expression	0.137504	0.800224
FBgn0071052	62	122	27	30	61.5185	122.881	27.0162	30.018	2.61178e-05	0.840699	0.156005	ambiguous	dominant	0.152003	0.846169
FBgn0081182	333	274	189	193	330.414	275.979	189.114	193.116	0.0413842	0.911575	0.27424	ambiguous	dominant	0.0302146	0.229501
FBgn0078393	399	463	190	243	395.901	466.344	190.114	243.146	0.0438056	0.0520513	0.673304	ambiguous	conserved-expression	0.354957	0.118703
FBgn0248471	207	262	146	180	205.392	263.892	146.088	180.108	0.0193545	0.183192	0.878356	ambiguous	over-dominant	0.302029	0.0595382
FBgn0248538	693	951	270	297	687.618	957.868	270.162	297.178	5.16484e-10	0.470969	0.0592157	ambiguous	under-dominant	0.137504	0.340717
FBgn0078731	230	296	165	165	228.214	298.138	165.099	165.099	0.00750094	0.998184	0.155844	ambiguous	dominant	0	0.385594
FBgn0079235	843	1044	438	462	836.453	1051.54	438.263	462.278	7.43792e-06	0.629646	0.097256	ambiguous	dominant	0.076962	0.253186
FBgn0248665	2382	2689	1080	1171	2363.5	2708.42	1080.65	1171.7	2.03331e-05	0.156763	0.468682	ambiguous	dominant	0.11671	0.0798173
FBgn0070401	122	88	38	34	121.052	88.6356	38.0228	34.0204	0.0422463	0.82558	0.654841	ambiguous	dominant	0.160465	0.28921
FBgn0261036	1657	1482	401	413	1644.13	1492.7	401.241	413.248	0.00834267	0.813402	0.249315	ambiguous	under-dominant	0.0425395	0.0968579
FBgn0246837	543	669	324	346	538.783	673.832	324.195	346.208	0.00056541	0.606372	0.237539	ambiguous	dominant	0.0947782	0.227907
FBgn0079441	22002	21166	8391	8468	21831.1	21318.9	8396.04	8473.09	0.00269684	0.618478	0.181247	ambiguous	under-dominant	0.0131785	0.0210768
FBgn0070134	249	330	155	153	247.066	332.383	155.093	153.092	0.00157198	0.983316	0.0923017	ambiguous	dominant	0.0187366	0.409214
FBgn0077673	494	413	301	263	490.163	415.983	301.181	263.158	0.0211397	0.310281	0.884135	ambiguous	over-dominant	0.194701	0.0420378
FBgn0070604	315	404	214	213	312.554	406.918	214.129	213.128	0.00179092	0.998184	0.0916661	ambiguous	dominant	0.00675737	0.373877
FBgn0072921	13	32	12	16	12.899	32.2311	12.0072	16.0096	0.00901024	0.677048	0.394376	ambiguous	dominant	0.415037	0.906154
FBgn0070861	217	334	141	183	215.315	336.412	141.085	183.11	1.75161e-06	0.0824221	0.366534	ambiguous	dominant	0.376148	0.267635
FBgn0246141	516	632	367	437	511.992	636.564	367.22	437.263	0.00115483	0.059914	0.789823	ambiguous	over-dominant	0.251853	0.062331
FBgn0081814	144	190	77	82	142.882	191.372	77.0463	82.0493	0.0211037	0.836923	0.423429	ambiguous	conserved-expression	0.0907655	0.330796
FBgn0078559	73	48	29	31	72.433	48.3467	29.0174	31.0186	0.0483541	0.900429	0.29351	ambiguous	conserved-expression	0.0962153	0.487016
FBgn0080471	115	158	45	65	114.107	159.141	45.027	65.0391	0.0171451	0.179636	0.936261	ambiguous	dominant	0.530515	0.0505933
FBgn0247799	179	243	95	125	177.61	244.755	95.0571	125.075	0.00369412	0.148632	0.882522	ambiguous	conserved-expression	0.395929	0.0666988
FBgn0248581	128	178	42	48	127.006	179.286	42.0252	48.0288	0.00833403	0.734911	0.579103	ambiguous	under-dominant	0.192645	0.304719
FBgn0080004	336	256	144	120	333.39	257.849	144.087	120.072	0.00354374	0.355625	0.772154	ambiguous	dominant	0.263034	0.107652
FBgn0249831	33	88	25	32	32.7437	88.6356	25.015	32.0192	1.41067e-06	0.588897	0.0867448	ambiguous	additive	0.356144	1.08052
FBgn0070195	949	1112	351	368	941.629	1120.4	351.211	368.344	0.000532968	0.714059	0.305235	ambiguous	under-dominant	0.0687151	0.182073
FBgn0073380	358	460	155	196	355.22	463.322	155.093	196.118	0.000739399	0.108722	0.895644	ambiguous	dominant	0.338585	0.0447196
XLOC_012678	21	5	3	0	20.8369	5.03611	3.0018	1	0.00320303	0.549177	0.893604	ambiguous	dominant	1.58583	0.46293
FBgn0080719	473	541	255	283	469.326	544.907	255.153	283.17	0.0476341	0.435992	0.812422	ambiguous	conserved-expression	0.150305	0.0651143
FBgn0081128	161	210	90	115	159.75	211.517	90.0541	115.069	0.0195152	0.227325	0.913552	ambiguous	dominant	0.353637	0.0513224
FBgn0075816	151	199	93	87	149.827	200.437	93.0559	87.0523	0.0185302	0.839584	0.144388	ambiguous	conserved-expression	0.0962153	0.323635
FBgn0071306	254	352	164	166	252.027	354.542	164.099	166.1	0.000159952	0.950082	0.0614346	ambiguous	dominant	0.0174874	0.47489
FBgn0249385	16	4	4	2	15.8757	4.02889	4.0024	2.0012	0.0131918	0.651925	0.696101	ambiguous	conserved-expression	1	0.978369
FBgn0076540	167	221	116	133	165.703	222.596	116.07	133.08	0.0114261	0.505266	0.529203	ambiguous	dominant	0.197301	0.228528
FBgn0073221	25	9	5	3	24.8058	9.065	5.003	3.0018	0.0125935	0.710171	0.726864	ambiguous	dominant	0.736966	0.715335
XLOC_006576	14	36	11	10	13.8913	36.26	11.0066	10.006	0.00375632	0.926439	0.139842	ambiguous	conserved-expression	0.137504	1.2467
FBgn0080368	266	372	72	70	263.934	374.687	72.0433	70.0421	6.52469e-05	0.953931	0.123907	ambiguous	under-dominant	0.040642	0.464865
FBgn0243963	63	91	35	37	62.5107	91.6572	35.021	37.0222	0.0417069	0.909592	0.444694	ambiguous	conserved-expression	0.0801703	0.471975
FBgn0246745	45	90	39	44	44.6505	90.65	39.0234	44.0264	0.000263072	0.77352	0.11881	ambiguous	dominant	0.174029	0.847601
FBgn0077472	428	544	269	282	424.676	547.929	269.162	282.169	0.000405595	0.756289	0.145031	ambiguous	dominant	0.068089	0.299538
FBgn0075301	706	542	300	294	700.517	545.914	300.18	294.177	2.45156e-05	0.933915	0.075311	ambiguous	dominant	0.0291463	0.330598
FBgn0079857	76	25	23	17	75.4097	25.1806	23.0138	17.0102	1.19472e-06	0.593179	0.129264	ambiguous	dominant	0.436099	1.14634
FBgn0070824	958	828	317	346	950.56	833.98	317.19	346.208	0.0082981	0.472615	0.0605365	ambiguous	under-dominant	0.126289	0.062475
FBgn0071695	437	513	264	253	433.606	516.705	264.159	253.152	0.021592	0.832209	0.132995	ambiguous	dominant	0.0614005	0.191556
FBgn0244141	487	592	250	299	483.218	596.276	250.15	299.18	0.00250429	0.126446	0.873297	ambiguous	conserved-expression	0.258217	0.0450887
FBgn0071503	46	5	8	2	45.6427	5.03611	8.00481	2.0012	5.16939e-09	0.17285	0.588678	ambiguous	dominant	2	1.18
FBgn0076538	244	310	184	191	242.105	312.239	184.111	191.115	0.00924392	0.844798	0.244438	ambiguous	over-dominant	0.0538669	0.313151
FBgn0081512	5	26	2	8	4.96117	26.1878	2.0012	8.00481	0.000250085	0.169205	0.874232	ambiguous	dominant	2	0.400142
FBgn0074084	297	395	105	117	294.693	397.853	105.063	117.07	0.000422776	0.643586	0.397804	ambiguous	under-dominant	0.156119	0.276901
FBgn0243742	117	160	79	87	116.091	161.156	79.0475	87.0523	0.0179811	0.737741	0.429554	ambiguous	dominant	0.139163	0.334031
FBgn0078049	238	172	130	116	236.152	173.242	130.078	116.07	0.00367774	0.634225	0.412788	ambiguous	dominant	0.164387	0.282535
FBgn0078139	2266	2420	904	905	2248.4	2437.48	904.543	905.544	0.0265655	0.964103	0.311268	ambiguous	under-dominant	0.00159502	0.114895
FBgn0245103	620	455	174	169	615.185	458.286	174.105	169.102	3.79975e-06	0.920009	0.102909	ambiguous	under-dominant	0.0420641	0.382707
FBgn0074191	386	450	224	231	383.002	453.25	224.135	231.139	0.0406788	0.860548	0.425785	ambiguous	dominant	0.0443941	0.198561
FBgn0075677	450	367	174	143	446.505	369.651	174.105	143.086	0.011761	0.250726	0.977994	ambiguous	dominant	0.283072	0.0105579
FBgn0249538	68	103	26	31	67.4719	103.744	26.0156	31.0186	0.0143878	0.722514	0.604428	ambiguous	dominant	0.253757	0.366912
FBgn0079285	284	414	186	202	281.794	416.99	186.112	202.121	2.33049e-06	0.63528	0.0573867	ambiguous	dominant	0.119053	0.446318
FBgn0076637	162	107	87	56	160.742	107.773	87.0523	56.0336	0.0025711	0.0545805	0.918983	ambiguous	conserved-expression	0.635589	0.0588363
FBgn0247521	1239	1098	442	370	1229.38	1105.93	442.266	370.222	0.0138232	0.0692521	0.575854	ambiguous	under-dominant	0.256521	0.103854
FBgn0244436	1074	883	394	399	1065.66	889.377	394.237	399.24	0.000111496	0.915506	0.0748996	ambiguous	under-dominant	0.0181931	0.242685
FBgn0071257	521	447	290	247	516.954	450.228	290.174	247.148	0.0455149	0.218981	0.911777	ambiguous	dominant	0.231542	0.032164
FBgn0080632	228	298	128	126	226.229	300.152	128.077	126.076	0.00441845	0.974671	0.143935	ambiguous	conserved-expression	0.0227201	0.385189
FBgn0244211	628	746	412	421	623.123	751.388	412.248	421.253	0.0024926	0.860548	0.159978	ambiguous	dominant	0.0311759	0.238866
FBgn0080676	117	166	81	84	116.091	167.199	81.0487	84.0505	0.0071578	0.905596	0.22714	ambiguous	dominant	0.0524674	0.473838
FBgn0247601	355	457	222	233	352.243	460.301	222.133	233.14	0.000705907	0.776375	0.164747	ambiguous	dominant	0.0697703	0.316236
FBgn0247935	64	97	36	36	63.5029	97.7006	36.0216	36.0216	0.0176657	0.998184	0.284754	ambiguous	conserved-expression	0	0.621544
FBgn0079135	19	38	5	14	18.8524	38.2744	5.003	14.0084	0.0221446	0.133277	0.748521	ambiguous	dominant	1.48543	0.463796
FBgn0080108	909	710	412	381	901.94	715.128	412.248	381.229	6.6507e-06	0.543059	0.193553	ambiguous	dominant	0.112853	0.221977
FBgn0071322	105	200	49	56	104.185	201.444	49.0294	56.0336	1.62843e-07	0.710171	0.0773975	ambiguous	dominant	0.192645	0.758596
FBgn0073646	744	501	252	205	738.222	504.618	252.151	205.123	9.15781e-11	0.124879	0.259028	ambiguous	dominant	0.2978	0.251061
FBgn0263161	2851	3225	1428	1506	2828.86	3248.29	1428.86	1506.9	1.8139e-06	0.304752	0.157987	ambiguous	dominant	0.0767258	0.122736
FBgn0079323	28	63	12	13	27.7825	63.455	12.0072	13.0078	0.000560326	0.926186	0.247002	ambiguous	dominant	0.115477	1.07608
FBgn0244389	36	2	7	2	35.7204	2.01444	7.00421	2.0012	8.07483e-09	0.248341	0.302602	ambiguous	dominant	1.80735	2.34094
FBgn0247977	250	148	48	48	248.058	149.069	48.0288	48.0288	1.86249e-06	0.998184	0.0862998	ambiguous	under-dominant	0	0.7347
FBgn0076982	240	344	142	172	238.136	346.484	142.085	172.103	4.2028e-05	0.241565	0.369778	ambiguous	dominant	0.276518	0.264487
FBgn0074961	311	427	115	138	308.585	430.084	115.069	138.083	4.66897e-05	0.33718	0.504546	ambiguous	under-dominant	0.263034	0.215918
FBgn0244074	16	4	10	2	15.8757	4.02889	10.006	2.0012	0.0131918	0.0779917	0.89228	ambiguous	conserved-expression	2.32193	0.343559
FBgn0076236	168	247	79	88	166.695	248.784	79.0475	88.0529	0.00025163	0.701823	0.256086	ambiguous	dominant	0.155651	0.42203
FBgn0079117	957	1296	538	622	949.567	1305.36	538.323	622.374	2.17939e-12	0.0585284	0.0633426	ambiguous	additive	0.209308	0.249797
FBgn0244027	1185	1513	574	637	1175.8	1523.93	574.345	637.383	5.58472e-10	0.193265	0.0845201	ambiguous	dominant	0.150243	0.223913
FBgn0071162	2895	2533	1805	1717	2872.52	2551.29	1806.08	1718.03	1.36598e-05	0.393021	0.255909	ambiguous	over-dominant	0.0721088	0.0989767
FBgn0081733	494	630	256	290	490.163	634.55	256.154	290.174	0.000104606	0.325725	0.380332	ambiguous	dominant	0.179909	0.192562
FBgn0244512	116	170	49	72	115.099	171.228	49.0294	72.0433	0.00298095	0.132014	0.977709	ambiguous	dominant	0.555215	0.0178255
FBgn0245534	272	330	130	169	269.887	332.383	130.078	169.102	0.029422	0.0968765	0.833664	ambiguous	conserved-expression	0.378512	0.0780215
FBgn0247840	61	111	27	40	60.5262	111.802	27.0162	40.024	0.000335958	0.284815	0.647483	ambiguous	dominant	0.567041	0.318269
FBgn0073962	263	322	86	84	260.957	324.326	86.0517	84.0505	0.0244228	0.961512	0.334346	ambiguous	under-dominant	0.0339473	0.279681
FBgn0072672	1892	2164	1020	1132	1877.31	2179.63	1020.61	1132.68	2.72664e-05	0.0619642	0.592767	ambiguous	dominant	0.150305	0.0651143
FBgn0077880	280	205	97	87	277.825	206.481	97.0583	87.0523	0.0023522	0.710171	0.472988	ambiguous	dominant	0.156969	0.271203
FBgn0078661	596	784	352	381	591.371	789.662	352.211	381.229	9.91734e-07	0.494771	0.0762706	ambiguous	dominant	0.114216	0.302956
FBgn0245758	190	298	58	76	188.524	300.152	58.0348	76.0457	2.85515e-06	0.296501	0.522186	ambiguous	under-dominant	0.389947	0.280997
FBgn0080648	576	768	337	404	571.526	773.547	337.202	404.243	4.00534e-07	0.0612046	0.360944	ambiguous	dominant	0.261607	0.175062
XLOC_014833	103	69	29	22	102.2	69.4983	29.0174	22.0132	0.022717	0.577316	0.852761	ambiguous	dominant	0.398549	0.157796
FBgn0081938	474	392	348	304	470.319	394.831	348.209	304.183	0.0163464	0.264276	0.832602	ambiguous	over-dominant	0.195016	0.0573867
FBgn0247746	211	127	62	38	209.361	127.917	62.0373	38.0228	2.39874e-05	0.0803785	0.993842	ambiguous	dominant	0.706269	0.00451498
FBgn0077920	746	901	410	430	740.206	907.507	410.246	430.258	0.000246973	0.685461	0.173057	ambiguous	dominant	0.0687128	0.225269
FBgn0076882	380	316	128	152	377.049	318.282	128.077	152.091	0.0391891	0.341389	0.0596323	ambiguous	dominant	0.247928	0.00348338
FBgn0077504	17	36	7	12	16.868	36.26	7.00421	12.0072	0.0172422	0.481921	0.822186	ambiguous	dominant	0.777608	0.326485
FBgn0078047	585	687	391	393	580.457	691.962	391.235	393.236	0.00696416	0.956122	0.161509	ambiguous	over-dominant	0.0073607	0.246143
FBgn0246708	133	176	92	93	131.967	177.271	92.0553	93.0559	0.0253838	0.970467	0.279188	ambiguous	dominant	0.0155969	0.410183
FBgn0079495	999	748	492	419	991.241	753.402	492.296	419.252	2.65749e-08	0.0862624	0.332825	ambiguous	dominant	0.231708	0.164108
FBgn0077949	131	187	94	97	129.983	188.351	94.0565	97.0583	0.00349746	0.911646	0.171567	ambiguous	dominant	0.045324	0.489778
FBgn0083525	30	30	21	20	29.767	51.947	21.0126	34.4036	0.0307942	0.213441	0.936691	ambiguous	dominant	0.711305	0.0920201
FBgn0245160	533	657	364	367	528.86	661.745	364.219	367.22	0.00062082	0.942362	0.0753905	ambiguous	dominant	0.0118416	0.311547
FBgn0073220	121	86	45	37	120.06	86.6211	45.027	37.0222	0.0344687	0.630654	0.774601	ambiguous	dominant	0.2824	0.188568
FBgn0263165	88	109	56	53	87.3165	172.294	56.0336	83.2252	7.27647e-07	0.0892484	0.441907	ambiguous	dominant	0.570726	0.409818
FBgn0071907	46	71	47	52	45.6427	71.5128	47.0282	52.0312	0.0370889	0.79328	0.386864	ambiguous	dominant	0.145851	0.501965
FBgn0247340	132	249	82	105	130.975	250.798	82.0493	105.063	6.45323e-09	0.247954	0.0906827	ambiguous	additive	0.356694	0.580545
FBgn0246209	34	88	28	40	33.7359	88.6356	28.0168	40.024	2.53406e-06	0.338881	0.153566	ambiguous	dominant	0.514573	0.879026
FBgn0073653	173	233	103	141	171.656	234.683	103.062	141.085	0.00571619	0.0682074	0.99633	ambiguous	dominant	0.453051	0.00186218
FBgn0080213	235	344	171	184	233.175	346.484	171.103	184.111	1.54863e-05	0.698679	0.063962	ambiguous	dominant	0.105709	0.465669
FBgn0246291	308	233	76	74	305.608	234.683	76.0457	74.0445	0.00427526	0.955537	0.375631	ambiguous	under-dominant	0.0384741	0.342496
FBgn0244948	2570	2116	1171	1071	2550.04	2131.28	1171.7	1071.64	1.11425e-09	0.161327	0.199127	ambiguous	dominant	0.128783	0.130015
FBgn0078276	657	482	206	191	651.897	485.481	206.124	191.115	1.82256e-06	0.709915	0.162352	ambiguous	under-dominant	0.109072	0.316158
FBgn0079650	353	475	199	216	350.258	478.431	199.12	216.13	5.18999e-05	0.620154	0.154637	ambiguous	dominant	0.118263	0.331627
FBgn0081596	91	134	56	71	90.2932	134.968	56.0336	71.0427	0.00829469	0.390436	0.653844	ambiguous	dominant	0.342392	0.237533
FBgn0243640	272	327	116	101	269.887	329.362	116.07	101.061	0.0390526	0.563793	0.103975	ambiguous	under-dominant	0.19977	0.0875452
FBgn0262675	350	488	200	250	347.282	491.524	200.12	250.15	4.77801e-06	0.0779877	0.487876	ambiguous	dominant	0.321928	0.179229
FBgn0073216	216	92	72	52	214.322	92.6644	72.0433	52.0312	9.98046e-12	0.228338	0.0719566	ambiguous	dominant	0.469485	0.74021
FBgn0080394	198	312	123	138	196.462	314.253	123.074	138.083	1.28118e-06	0.577685	0.0739634	ambiguous	dominant	0.16601	0.511666
FBgn0076044	292	423	174	201	289.732	426.055	174.105	201.121	2.58267e-06	0.356881	0.161511	ambiguous	dominant	0.208108	0.348212
FBgn0070137	62	94	28	28	61.5185	94.6789	28.0168	28.0168	0.0195565	0.998184	0.336586	ambiguous	dominant	0	0.622023
FBgn0072442	24	46	5	12	23.8136	46.3322	5.003	12.0072	0.0165198	0.241753	0.84282	ambiguous	dominant	1.26303	0.302804
FBgn0071668	162	106	52	57	160.742	106.766	52.0312	57.0342	0.002048	0.804368	0.0912407	ambiguous	dominant	0.13245	0.457849
FBgn0076160	143	195	68	91	141.889	196.408	68.0409	91.0547	0.00902197	0.20412	0.927022	ambiguous	conserved-expression	0.420332	0.0487579
FBgn0076338	235	145	49	38	233.175	146.047	49.0294	38.0228	1.99433e-05	0.482259	0.573615	ambiguous	under-dominant	0.366782	0.308195
FBgn0247222	5604	5891	2257	2254	5560.48	5933.55	2258.36	2255.35	0.00561253	0.970272	0.159041	ambiguous	under-dominant	0.0019189	0.0917674
FBgn0076692	70	154	61	80	69.4563	155.112	61.0366	80.0481	5.81616e-08	0.278669	0.0626077	ambiguous	dominant	0.391191	0.767943
FBgn0070358	67	116	51	48	66.4796	116.838	51.0306	48.0288	0.000690668	0.897886	0.0512864	ambiguous	dominant	0.0874628	0.72606
FBgn0079627	165	269	91	117	163.719	270.943	91.0547	117.07	1.72496e-06	0.209378	0.298716	ambiguous	additive	0.36257	0.364201
FBgn0070561	163	217	74	74	161.734	218.567	74.0445	74.0445	0.01055	0.998184	0.269648	ambiguous	dominant	0	0.434454
FBgn0076864	667	560	220	228	661.82	564.044	220.132	228.137	0.00819938	0.83678	0.193354	ambiguous	under-dominant	0.0515303	0.179099
FBgn0248618	439	509	265	261	435.59	512.676	265.159	261.157	0.0348088	0.961882	0.237474	ambiguous	dominant	0.0219426	0.213133
FBgn0246372	65	117	55	62	64.4952	117.845	55.033	62.0373	0.000286488	0.726228	0.130772	ambiguous	dominant	0.172837	0.696791
FBgn0243919	553	329	177	134	548.705	331.376	177.106	134.081	6.87141e-13	0.0783743	0.221681	ambiguous	dominant	0.401516	0.326045
FBgn0078679	263	364	161	164	260.957	366.629	161.097	164.099	0.000128202	0.927414	0.0687063	ambiguous	dominant	0.0266351	0.463871
FBgn0245237	74	115	36	38	73.4253	115.831	36.0216	38.0228	0.00592821	0.910691	0.306294	ambiguous	dominant	0.0780025	0.579665
FBgn0073439	33	88	25	32	32.7437	88.6356	25.015	32.0192	1.41067e-06	0.588897	0.0867448	ambiguous	additive	0.356144	1.08052
FBgn0076353	737	517	232	187	731.276	520.734	232.139	187.112	6.60889e-09	0.124411	0.469599	ambiguous	under-dominant	0.311087	0.178783
FBgn0081062	52	78	43	47	51.5961	78.5633	43.0258	47.0282	0.0397402	0.829227	0.417275	ambiguous	dominant	0.128324	0.478269
FBgn0071336	566	711	386	423	561.604	716.135	386.232	423.254	0.000101173	0.387821	0.223069	ambiguous	over-dominant	0.132057	0.218621
FBgn0070277	170	113	63	44	168.68	113.816	63.0379	44.0264	0.00230609	0.214214	0.938045	ambiguous	dominant	0.517848	0.0497329
FBgn0071118	585	679	362	378	580.457	683.904	362.217	378.227	0.0129195	0.738313	0.367666	ambiguous	dominant	0.0623965	0.174209
FBgn0080314	3827	3345	1668	1580	3797.28	3369.16	1669	1580.95	3.61445e-07	0.364628	0.270914	ambiguous	dominant	0.0781947	0.0943822
FBgn0248237	350	284	130	124	347.282	286.051	130.078	124.075	0.0239752	0.875908	0.52035	ambiguous	dominant	0.0681715	0.211662
FBgn0248583	261	415	89	122	258.973	417.997	89.0535	122.073	9.7509e-09	0.0947111	0.505877	ambiguous	dominant	0.455004	0.235688
FBgn0072835	648	547	188	189	642.967	550.951	188.113	189.114	0.0118808	0.972525	0.34582	ambiguous	under-dominant	0.00765357	0.215169
FBgn0078599	70	153	32	56	69.4563	154.105	32.0192	56.0336	7.93725e-08	0.0520931	0.569981	ambiguous	dominant	0.807355	0.342381
FBgn0247637	2394	2606	780	832	2375.41	2624.82	780.469	832.5	0.00308241	0.378862	0.713046	ambiguous	under-dominant	0.0931094	0.0509353
FBgn0071660	178	238	137	126	176.618	239.719	137.082	126.076	0.00636546	0.73894	0.0527114	ambiguous	dominant	0.120752	0.319963
FBgn0075204	1771	1571	791	747	1757.25	1582.35	791.475	747.449	0.00303688	0.543363	0.631798	ambiguous	dominant	0.0825695	0.0686809
FBgn0080626	1020	1156	546	571	1012.08	1164.35	546.328	571.343	0.0052347	0.651048	0.371073	ambiguous	dominant	0.0645898	0.137613
XLOC_010037	72	45	35	38	71.4408	45.325	35.021	38.0228	0.0281792	0.862409	0.188034	ambiguous	dominant	0.118644	0.537797
FBgn0245751	17	36	15	24	16.868	36.26	15.009	24.0144	0.0172422	0.347107	0.686389	ambiguous	dominant	0.678072	0.426021
FBgn0247645	773	662	281	242	766.996	666.781	281.169	242.145	0.0120017	0.268402	0.960336	ambiguous	under-dominant	0.215563	0.0135566
FBgn0070197	180	273	74	85	178.602	274.972	74.0445	85.0511	3.24821e-05	0.610136	0.260018	ambiguous	dominant	0.199938	0.422597
FBgn0070652	386	518	216	237	383.002	521.741	216.13	237.142	2.67353e-05	0.543534	0.163526	ambiguous	dominant	0.133856	0.312126
FBgn0263160	1135	889	494	468	1126.18	912.056	494.297	476.981	3.81511e-06	0.811442	0.0846398	ambiguous	dominant	0.0514456	0.252804
FBgn0074539	1266	1133	444	373	1256.17	1141.18	444.267	373.224	0.0234684	0.075934	0.531446	ambiguous	under-dominant	0.251384	0.112885
FBgn0079815	1874	1668	898	810	1859.45	1680.05	898.54	810.487	0.00307528	0.153221	0.988945	ambiguous	dominant	0.148794	0.0024226
FBgn0077308	250	190	154	160	248.058	191.372	154.093	160.096	0.0122377	0.859348	0.128908	ambiguous	over-dominant	0.0551416	0.319156
FBgn0248038	2235	1911	1234	1194	2217.64	1924.8	1234.74	1194.72	6.74128e-06	0.711281	0.104609	ambiguous	over-dominant	0.0475396	0.156777
FBgn0080521	15	34	30	31	14.8835	34.2456	30.018	31.0186	0.0128495	0.95254	0.127038	ambiguous	over-dominant	0.0473057	1.1549
FBgn0246703	1106	893	389	372	1097.41	899.449	389.234	372.224	1.66985e-05	0.780698	0.181755	ambiguous	under-dominant	0.0644675	0.222521
FBgn0075143	124	82	48	30	123.037	82.5922	48.0288	30.018	0.00935973	0.155835	0.887632	ambiguous	dominant	0.678072	0.103058
FBgn0071089	61	98	39	51	60.5262	98.7078	39.0234	51.0306	0.00689369	0.422169	0.604428	ambiguous	dominant	0.387023	0.31858
FBgn0079188	879	779	572	498	872.173	784.626	572.344	498.299	0.041119	0.11794	0.815069	ambiguous	over-dominant	0.199869	0.0472603
FBgn0079814	69	139	42	69	68.4641	140.004	42.0252	69.0415	3.40183e-06	0.0517649	0.570971	ambiguous	dominant	0.716207	0.31584
FBgn0072803	114	76	67	63	113.115	76.5489	67.0403	63.0379	0.0149186	0.880551	0.312677	ambiguous	dominant	0.0888093	0.474523
FBgn0079587	25	2	7	3	24.8058	2.01444	7.00421	3.0018	6.8926e-06	0.427121	0.224818	ambiguous	additive	1.22239	2.39983
FBgn0078108	210	145	75	77	208.369	146.047	75.0451	77.0463	0.00193679	0.934795	0.140952	ambiguous	dominant	0.0379679	0.474738
FBgn0079540	1094	956	610	588	1085.5	962.904	610.366	588.353	0.0092973	0.778163	0.442617	ambiguous	over-dominant	0.0529931	0.119906
FBgn0074829	330	249	246	148	327.437	478.401	246.148	282.482	8.82615e-07	0.277607	0.176485	ambiguous	dominant	0.198633	0.348372
XLOC_000434	33	66	25	39	32.7437	66.4767	25.015	39.0234	0.00200851	0.228346	0.622847	ambiguous	dominant	0.641546	0.380085
FBgn0076033	158	104	124	88	156.773	104.751	124.075	88.0529	0.00271294	0.0721111	0.861541	ambiguous	over-dominant	0.494765	0.0869456
FBgn0081620	408	529	249	268	404.831	532.821	249.15	268.161	0.000166344	0.617299	0.175724	ambiguous	dominant	0.106087	0.290242
FBgn0070347	14	50	8	12	13.8913	50.3611	8.00481	12.0072	1.34246e-05	0.606372	0.254526	ambiguous	dominant	0.584963	1.27317
FBgn0076066	241	329	158	160	239.128	331.376	158.095	160.096	0.000503438	0.949859	0.0851234	ambiguous	dominant	0.0181473	0.452538
FBgn0074718	532	314	185	150	527.868	316.268	185.111	150.09	9.51273e-13	0.198151	0.0735074	ambiguous	dominant	0.302563	0.436468
FBgn0244201	220	147	78	70	218.291	148.062	78.0469	70.0421	0.000544014	0.744527	0.315566	ambiguous	dominant	0.156119	0.403937
FBgn0248159	144	86	77	67	142.882	86.6211	77.0463	67.0403	0.000475755	0.656986	0.223699	ambiguous	dominant	0.200697	0.521332
FBgn0070272	255	324	99	84	253.02	326.34	99.0595	84.0505	0.00764678	0.521386	0.0524965	ambiguous	under-dominant	0.237039	0.130088
FBgn0078874	220	366	113	155	218.291	368.643	113.068	155.093	5.15349e-09	0.0509677	0.334346	ambiguous	dominant	0.455945	0.300025
FBgn0083546	69	41	26	14	68.4641	41.2961	26.0156	14.0084	0.0179561	0.190376	0.873796	ambiguous	dominant	0.893085	0.163743
FBgn0072712	246	166	96	88	244.089	167.199	96.0577	88.0529	0.000338491	0.77757	0.23874	ambiguous	dominant	0.125531	0.420313
FBgn0078935	310	471	177	215	307.592	474.402	177.106	215.129	2.49949e-08	0.170675	0.153708	ambiguous	additive	0.280587	0.344502
FBgn0079317	163	240	38	52	161.734	241.733	38.0228	52.0312	0.000297446	0.328891	0.83642	ambiguous	under-dominant	0.452512	0.127281
FBgn0076712	435	513	131	145	431.622	516.705	131.079	145.087	0.0181456	0.620154	0.737279	ambiguous	under-dominant	0.146486	0.113088
FBgn0076383	128	70	36	38	127.006	70.4141	36.0216	37.9735	0.000138305	0.911856	0.0698541	ambiguous	dominant	0.0761301	0.774829
FBgn0070176	59	30	34	23	58.5418	30.2167	34.0204	23.0138	0.00544101	0.354746	0.631837	ambiguous	dominant	0.563901	0.390221
FBgn0247407	912	732	316	303	904.917	737.287	316.19	303.182	6.37632e-05	0.820077	0.208172	ambiguous	under-dominant	0.0606068	0.234953
FBgn0076837	335	205	122	111	332.398	206.481	122.073	111.067	1.65674e-07	0.719472	0.0593211	ambiguous	dominant	0.136321	0.550585
FBgn0249899	123	270	34	42	122.045	271.95	34.0204	42.0252	3.51487e-13	0.59255	0.0761492	ambiguous	under-dominant	0.304855	0.851077
FBgn0071327	1127	1357	595	611	1118.25	1366.8	595.357	611.367	7.11375e-06	0.788938	0.050854	ambiguous	dominant	0.0382827	0.251281
FBgn0243603	112	75	49	44	111.13	75.6808	49.0294	44.1075	0.0176175	0.810599	0.469554	ambiguous	conserved-expression	0.152624	0.401627
FBgn0078183	896	666	340	311	889.041	670.81	340.204	311.187	7.26801e-08	0.521025	0.118824	ambiguous	dominant	0.12862	0.277726
FBgn0244318	564	737	197	225	559.62	742.323	197.118	225.135	3.7311e-06	0.368609	0.35535	ambiguous	under-dominant	0.191729	0.215871
FBgn0243926	320	139	156	86	317.515	235.673	156.094	144.854	0.00103045	0.754489	0.324314	ambiguous	dominant	0.107817	0.322219
XLOC_010301	33	17	8	7	32.7437	17.1228	8.00481	7.00421	0.0466541	0.910829	0.585583	ambiguous	dominant	0.192645	0.742655
FBgn0245619	57	18	7	2	56.5573	18.13	7.00421	2.0012	1.83908e-05	0.248341	0.942186	ambiguous	dominant	1.80735	0.166021
FBgn0250438	110	69	30	33	109.146	69.4983	30.018	33.0198	0.00612502	0.851373	0.167641	ambiguous	dominant	0.137504	0.513701
FBgn0079202	788	911	282	299	781.88	917.579	282.169	299.18	0.00449683	0.68285	0.48675	ambiguous	under-dominant	0.0844503	0.146436
FBgn0070212	33	75	12	15	32.7437	75.5417	12.0072	15.009	0.000128537	0.76368	0.334661	ambiguous	dominant	0.321928	0.884127
FBgn0080161	28	11	12	7	27.7825	11.0794	12.0072	7.00421	0.0137443	0.488363	0.700508	ambiguous	conserved-expression	0.777608	0.548685
FBgn0071193	20	40	19	17	19.8447	40.2889	19.0114	17.0102	0.0186622	0.882588	0.153373	ambiguous	conserved-expression	0.160465	0.861166
FBgn0072004	102	54	64	54	101.208	54.39	64.0385	54.0324	0.000411159	0.612622	0.181291	ambiguous	dominant	0.245112	0.650795
FBgn0263291	2541	2113	1281	1149	2521.26	2128.26	1281.77	1149.69	9.84213e-09	0.0553866	0.411484	ambiguous	dominant	0.156892	0.0875812
FBgn0247892	28	63	15	26	27.7825	63.455	15.009	26.0156	0.000560326	0.238218	0.674267	ambiguous	conserved-expression	0.793549	0.398007
FBgn0243707	412	275	237	186	408.8	276.986	237.142	186.112	1.2511e-06	0.0735532	0.428386	ambiguous	dominant	0.349584	0.211998
FBgn0077137	328	264	87	90	325.453	265.907	87.0523	90.0541	0.0232298	0.909456	0.335978	ambiguous	under-dominant	0.0489096	0.242618
FBgn0248360	370	284	194	150	367.126	286.051	194.117	150.09	0.00284051	0.0896608	0.977114	ambiguous	dominant	0.371094	0.0110905
FBgn0064427	112	64	48	38	111.13	64.4622	48.0288	38.0228	0.000972484	0.531627	0.434813	ambiguous	conserved-expression	0.337035	0.448689
FBgn0249791	59	130	43	53	58.5418	130.939	43.0258	53.0318	6.80706e-07	0.54064	0.0744818	ambiguous	additive	0.301656	0.8597
FBgn0081971	511	604	193	203	507.031	608.362	193.116	203.122	0.00886401	0.785289	0.452598	ambiguous	under-dominant	0.0728789	0.189977
FBgn0247926	1389	1223	684	601	1378.21	1231.83	684.411	601.361	0.00547911	0.107934	0.89243	ambiguous	conserved-expression	0.186631	0.0246399
FBgn0245233	6	38	2	8	5.9534	38.2744	2.0012	8.00481	1.54252e-06	0.169205	0.768012	ambiguous	dominant	2	0.684596
FBgn0078736	1515	1641	736	786	1503.23	1652.85	736.442	786.472	0.0301296	0.386493	0.790167	ambiguous	dominant	0.0948235	0.0420646
FBgn0071813	233	385	140	170	231.19	387.781	140.084	170.102	3.06752e-09	0.237635	0.0766747	ambiguous	additive	0.280108	0.466051
FBgn0071375	26	6	14	4	25.7981	6.04333	14.0084	4.0024	0.000786098	0.0767441	0.882999	ambiguous	dominant	1.80735	0.286492
FBgn0078907	80	49	16	17	79.3787	49.3539	16.0096	17.0102	0.0155405	0.934999	0.339348	ambiguous	dominant	0.0874628	0.598125
FBgn0080716	207	97	100	69	205.392	97.7006	100.06	69.0415	1.75823e-09	0.0846753	0.16421	ambiguous	dominant	0.535332	0.536612
FBgn0246280	79	126	34	52	78.3864	126.91	34.0204	52.0312	0.00226036	0.169639	0.907095	ambiguous	dominant	0.612977	0.082153
FBgn0248949	63	112	33	36	62.5107	112.809	33.0198	36.0216	0.000508983	0.858393	0.201342	ambiguous	dominant	0.125531	0.726175
FBgn0248614	275	220	136	116	272.864	221.589	136.082	116.07	0.0338464	0.453084	0.863836	ambiguous	conserved-expression	0.229482	0.0708155
FBgn0072026	53	103	39	51	52.5884	103.744	39.0234	51.0306	0.0001568	0.422169	0.284614	ambiguous	dominant	0.387023	0.593188
FBgn0071302	187	242	62	51	185.548	243.748	62.0373	51.0306	0.0143746	0.550147	0.0888321	ambiguous	under-dominant	0.281771	0.111829
FBgn0075451	455	532	250	299	451.466	535.842	250.15	299.18	0.0222983	0.126446	0.969704	ambiguous	dominant	0.258217	0.011027
FBgn0243975	466	387	267	234	462.381	389.795	267.16	234.141	0.0201591	0.362189	0.850114	ambiguous	dominant	0.190331	0.0560345
FBgn0070724	217	280	144	144	215.315	282.022	144.087	144.087	0.00878172	0.998184	0.17937	ambiguous	dominant	0	0.389363
FBgn0245810	73	46	9	9	72.433	46.3322	9.00541	9.00541	0.0297876	0.998184	0.576863	ambiguous	under-dominant	0	0.644632
FBgn0079125	582	504	289	300	577.48	507.64	289.174	300.18	0.0474869	0.801328	0.242067	ambiguous	dominant	0.053893	0.132072
FBgn0244306	134	89	44	38	132.959	89.6428	44.0264	38.0228	0.0073097	0.73894	0.538348	ambiguous	dominant	0.211504	0.357221
FBgn0070318	96	139	77	93	95.2544	140.004	77.0463	93.0559	0.00988439	0.437085	0.531011	ambiguous	dominant	0.272372	0.283237
FBgn0077265	57	103	36	37	56.5573	103.744	36.0216	37.0222	0.000654512	0.955537	0.126233	ambiguous	dominant	0.0395284	0.835713
FBgn0078046	292	384	153	166	289.732	386.773	153.092	166.1	0.000842807	0.677644	0.281106	ambiguous	dominant	0.117652	0.299117
FBgn0074138	12	44	10	10	11.9068	44.3178	10.006	10.006	3.66912e-05	0.998184	0.0639723	ambiguous	dominant	0	1.8961
FBgn0077261	538	627	200	199	533.822	631.528	200.12	199.12	0.014452	0.998184	0.290533	ambiguous	under-dominant	0.00723157	0.235258
FBgn0070553	162	114	59	54	160.742	114.823	59.0354	54.0324	0.0106991	0.828645	0.46181	ambiguous	dominant	0.127756	0.357574
FBgn0247734	147	197	89	87	145.858	198.423	89.0535	87.0523	0.0131123	0.962579	0.191621	ambiguous	conserved-expression	0.0327899	0.41122
FBgn0247849	440	525	288	341	436.583	528.792	288.173	341.205	0.0104059	0.121687	0.905759	ambiguous	over-dominant	0.243703	0.0327417
FBgn0072291	44	71	16	19	43.6583	71.5128	16.0096	19.0114	0.0221293	0.795599	0.604428	ambiguous	dominant	0.247928	0.464019
FBgn0250387	158	118	81	59	156.773	118.852	81.0487	59.0354	0.0374549	0.209378	0.920016	ambiguous	conserved-expression	0.457207	0.0577
FBgn0075778	19	7	4	8	18.8524	7.05056	4.0024	8.00481	0.0349155	0.477111	0.0732829	ambiguous	conserved-expression	1	0.418942
FBgn0243997	304	215	130	126	301.639	216.553	130.078	126.076	0.000404533	0.925026	0.142173	ambiguous	conserved-expression	0.0450879	0.433016
FBgn0249099	24	66	16	30	23.8136	66.4767	16.0096	30.018	2.24362e-05	0.138652	0.508145	ambiguous	dominant	0.906891	0.574172
FBgn0071524	68	107	54	49	67.4719	107.773	54.0324	49.0294	0.00658838	0.81879	0.0806941	ambiguous	dominant	0.140178	0.535457
FBgn0079163	972	699	301	256	964.451	704.048	301.181	256.154	4.23673e-10	0.204078	0.268788	ambiguous	under-dominant	0.23362	0.220413
FBgn0077685	10	36	0	8	9.92233	36.26	1	8.00481	0.000243267	0.0648654	0.644587	ambiguous	dominant	3.00087	1.13124
FBgn0081189	676	499	314	296	670.75	502.604	314.189	296.178	2.0487e-06	0.725817	0.0755785	ambiguous	dominant	0.0851674	0.331185
XLOC_013645	132	82	50	54	130.975	82.5922	50.03	54.0324	0.00200366	0.840473	0.0844908	ambiguous	conserved-expression	0.111031	0.55418
FBgn0076198	422	488	134	138	418.722	491.524	134.081	138.083	0.0427241	0.898077	0.540906	ambiguous	under-dominant	0.0424353	0.188834
FBgn0072792	95	66	51	57	94.2622	66.4767	51.0306	57.0342	0.0478731	0.758779	0.171567	ambiguous	dominant	0.160465	0.343366
FBgn0075550	27	50	13	13	26.7903	50.3611	13.0078	13.0078	0.0169194	0.998184	0.337337	ambiguous	dominant	0	0.910599
FBgn0246904	98	146	73	66	97.2389	147.054	73.0439	66.0397	0.00441882	0.774218	0.0598905	ambiguous	dominant	0.14543	0.451315
FBgn0249104	196	113	82	65	194.478	113.816	82.0493	65.0391	1.16201e-05	0.382144	0.291713	ambiguous	dominant	0.335184	0.437716
FBgn0071251	116	153	80	72	115.099	154.105	80.0481	72.0433	0.0406773	0.748046	0.143201	ambiguous	conserved-expression	0.152003	0.269034
FBgn0079273	62	90	34	34	61.5185	90.65	34.0204	34.0204	0.0404037	0.998184	0.358914	ambiguous	conserved-expression	0	0.559288
FBgn0070427	454	596	219	245	450.474	600.304	219.132	245.147	2.68157e-05	0.437898	0.264938	ambiguous	dominant	0.161851	0.2524
FBgn0073106	696	781	463	443	690.594	786.641	463.278	443.266	0.0378353	0.760151	0.116794	ambiguous	over-dominant	0.0637055	0.12416
FBgn0078128	225	310	137	142	223.253	312.239	137.082	142.085	0.000527938	0.877725	0.126707	ambiguous	dominant	0.051715	0.432259
FBgn0245894	250	354	234	258	248.058	356.557	234.141	258.155	5.66118e-05	0.494771	0.0959507	ambiguous	over-dominant	0.140863	0.382589
FBgn0248396	398	299	174	149	394.909	301.159	174.105	149.09	0.000763399	0.393021	0.586977	ambiguous	dominant	0.223775	0.167217
FBgn0073839	42	16	12	4	41.6738	16.1156	12.0072	4.0024	0.00160252	0.153221	0.900024	ambiguous	dominant	1.58496	0.214276
FBgn0075139	31	69	13	18	30.7592	69.4983	13.0078	18.0108	0.000340003	0.604992	0.440173	ambiguous	dominant	0.469485	0.706474
FBgn0244800	60	37	20	20	59.534	37.2672	20.012	20.012	0.041119	0.998184	0.398218	ambiguous	conserved-expression	0	0.675807
FBgn0070386	734	572	367	353	728.299	576.131	367.22	353.212	4.93395e-05	0.821694	0.109557	ambiguous	dominant	0.0561119	0.282022
FBgn0071013	63	32	25	18	62.5107	32.2311	25.015	18.0108	0.00389629	0.534047	0.575252	ambiguous	conserved-expression	0.473931	0.481718
FBgn0077728	114	81	57	55	113.115	81.585	57.0342	55.033	0.0404863	0.944112	0.405448	ambiguous	conserved-expression	0.0515303	0.419879
FBgn0077540	3	23	5	13	2.9767	23.1661	5.003	13.0078	0.000100844	0.18196	0.335271	ambiguous	dominant	1.37851	1.58172
FBgn0077425	254	203	88	97	252.027	204.466	88.0529	97.0583	0.0411024	0.717836	0.197466	ambiguous	dominant	0.140481	0.161237
FBgn0243571	45	73	19	18	44.6505	73.5272	19.0114	18.0108	0.0189473	0.949859	0.30517	ambiguous	dominant	0.0780025	0.6416
FBgn0079442	69	36	38	31	68.4641	36.26	38.0228	31.0186	0.00347579	0.649267	0.340896	ambiguous	dominant	0.293731	0.623238
FBgn0071764	313	388	106	94	310.569	390.802	106.064	94.0565	0.00826529	0.652354	0.093802	ambiguous	under-dominant	0.173332	0.158193
FBgn0080385	312	439	210	222	309.577	442.171	210.126	222.133	9.14541e-06	0.747239	0.0508747	ambiguous	dominant	0.0801703	0.434135
FBgn0078620	603	787	353	381	598.317	792.684	353.212	381.229	1.84676e-06	0.514524	0.0842321	ambiguous	dominant	0.110123	0.295714
FBgn0074159	1113	1243	515	488	1104.36	1251.98	515.309	488.293	0.0103057	0.670708	0.0637636	ambiguous	dominant	0.0776913	0.103312
XLOC_000653	16	32	9	20	15.8757	32.2311	9.00541	20.012	0.0373392	0.142708	0.924623	ambiguous	conserved-expression	1.152	0.130372
FBgn0076803	2627	2384	1428	1382	2606.6	2401.22	1428.86	1382.83	0.00382206	0.688193	0.490758	ambiguous	over-dominant	0.0472384	0.0711629
FBgn0263148	514	439	297	239	510.008	442.171	297.178	239.144	0.0403764	0.0706474	0.677144	ambiguous	dominant	0.313452	0.107536
FBgn0074043	97	166	64	70	96.2466	167.199	64.0385	70.0421	5.49376e-05	0.785313	0.0994493	ambiguous	dominant	0.129283	0.667474
FBgn0246817	247	177	115	112	245.082	178.278	115.069	112.067	0.0023522	0.944112	0.194334	ambiguous	dominant	0.0381351	0.420996
FBgn0072570	224	167	84	75	222.26	168.206	84.0505	75.0451	0.0113437	0.720012	0.578922	ambiguous	dominant	0.163499	0.238521
FBgn0076224	183	267	140	165	181.579	268.928	140.084	165.099	0.000180981	0.341977	0.278684	ambiguous	dominant	0.237039	0.329588
FBgn0246074	35	75	24	22	34.7282	75.5417	24.0144	22.0132	0.000326147	0.897824	0.0593672	ambiguous	dominant	0.125531	0.995636
FBgn0078648	415	531	252	267	411.777	534.835	252.151	267.16	0.000335958	0.709883	0.166958	ambiguous	dominant	0.083416	0.293815
FBgn0248042	243	182	71	48	241.113	183.314	71.0427	48.0288	0.00922744	0.139596	0.744625	ambiguous	under-dominant	0.564785	0.169397
FBgn0249640	69	111	29	38	68.4641	111.802	29.0174	38.0228	0.00371867	0.501635	0.639628	ambiguous	dominant	0.389947	0.317576
FBgn0070160	1766	2074	828	867	1752.28	2088.98	828.497	867.521	1.02189e-06	0.543059	0.0866077	ambiguous	dominant	0.0664012	0.18716
FBgn0075314	271	153	86	66	268.895	154.105	86.0517	66.0397	7.01127e-08	0.290863	0.282543	ambiguous	dominant	0.381871	0.42126
FBgn0248026	119	168	80	80	118.076	169.213	80.0481	80.0481	0.00757993	0.998184	0.180299	ambiguous	dominant	0	0.51913
FBgn0080862	244	394	117	137	242.105	396.846	117.07	137.082	8.93824e-09	0.42199	0.0841761	ambiguous	dominant	0.227667	0.485278
FBgn0081201	27	47	13	9	26.7903	156.451	13.0078	29.7618	1.99066e-22	0.0506401	0.285268	ambiguous	dominant	1.19408	1.35185
FBgn0076347	247	180	156	127	245.082	181.3	156.094	127.076	0.00389966	0.255724	0.710459	ambiguous	dominant	0.296718	0.138166
FBgn0072332	17	44	14	20	16.868	44.3178	14.0084	20.012	0.00116894	0.539775	0.347142	ambiguous	dominant	0.514573	0.879026
FBgn0074275	1120	812	518	449	1111.3	817.864	518.311	449.27	5.27736e-11	0.125302	0.116794	ambiguous	additive	0.206237	0.23608
FBgn0079043	422	490	257	244	418.722	493.539	257.154	244.147	0.0369066	0.791321	0.144618	ambiguous	dominant	0.0748872	0.162282
FBgn0074613	12	32	6	8	11.9068	32.2311	6.0036	8.00481	0.00507591	0.785313	0.463896	ambiguous	dominant	0.415037	1.02163
FBgn0077903	2403	2157	1048	982	2384.34	2172.58	1048.63	982.59	0.0018673	0.387431	0.761739	ambiguous	dominant	0.0938438	0.040336
FBgn0248822	50	23	11	8	49.6117	21.9282	11.0066	7.57707	0.00224097	0.668513	0.602338	ambiguous	dominant	0.538658	0.639232
FBgn0077471	124	234	49	71	123.037	235.69	49.0294	71.0427	1.91738e-08	0.153221	0.375754	ambiguous	dominant	0.535037	0.402762
FBgn0073413	293	398	163	207	290.724	400.874	163.098	207.124	0.000148473	0.0900377	0.702734	ambiguous	dominant	0.344759	0.11874
FBgn0077249	23	59	21	21	22.8214	59.4261	21.0126	21.0126	0.000161594	0.998184	0.0561599	ambiguous	dominant	0	1.38071
FBgn0070092	453	527	194	186	449.482	530.806	194.117	186.112	0.027745	0.863606	0.208355	ambiguous	under-dominant	0.060754	0.179169
FBgn0246669	12	26	12	17	11.9068	26.1878	12.0072	17.0102	0.0405658	0.589762	0.587327	ambiguous	dominant	0.5025	0.634608
FBgn0078151	684	533	265	248	678.688	536.849	265.159	248.149	9.21389e-05	0.712739	0.252379	ambiguous	dominant	0.0956522	0.242578
FBgn0249432	17	4	14	6	16.868	4.02889	14.0084	6.0036	0.00825552	0.219176	0.617145	ambiguous	dominant	1.22239	0.84344
FBgn0246075	536	612	269	316	531.837	616.42	269.162	316.19	0.0365485	0.164116	0.94436	ambiguous	conserved-expression	0.232318	0.019389
FBgn0078484	3065	2614	1479	1362	3041.2	2632.88	1479.89	1362.82	6.12562e-08	0.143224	0.349516	ambiguous	additive	0.118895	0.0891019
FBgn0075748	7	31	5	7	6.94563	31.2239	5.003	7.00421	0.000168139	0.764123	0.250796	ambiguous	dominant	0.485427	1.68305
FBgn0070816	112	188	62	90	111.13	189.358	62.0373	90.0541	3.0796e-05	0.0954829	0.624227	ambiguous	dominant	0.537657	0.231208
FBgn0081859	288	408	96	114	285.763	410.947	96.0577	114.068	1.38174e-05	0.427261	0.41359	ambiguous	under-dominant	0.247928	0.276204
FBgn0072885	486	614	230	264	482.225	618.434	230.138	264.159	0.000232785	0.297624	0.504521	ambiguous	dominant	0.198904	0.160009
FBgn0079537	373	436	207	218	370.103	439.149	207.124	218.131	0.0406788	0.76763	0.516905	ambiguous	conserved-expression	0.0746974	0.172086
FBgn0077623	196	288	125	138	194.478	290.08	125.075	138.083	7.18975e-05	0.644108	0.143918	ambiguous	dominant	0.14274	0.434106
FBgn0077367	82	117	64	58	81.3631	117.845	64.0385	58.0348	0.0238148	0.796423	0.124473	ambiguous	dominant	0.142019	0.392424
FBgn0071061	17	40	6	12	16.868	40.2889	6.0036	12.0072	0.00473173	0.356883	0.869735	ambiguous	dominant	1	0.256096
FBgn0243561	574	473	215	219	569.542	476.416	215.129	219.132	0.00653908	0.916197	0.208201	ambiguous	dominant	0.0265942	0.230986
FBgn0073809	84	53	30	21	83.3476	53.3828	30.018	21.0126	0.0193532	0.441074	0.886734	ambiguous	dominant	0.514573	0.128193
FBgn0079329	474	373	200	178	470.319	375.694	200.12	178.107	0.00208023	0.518111	0.580493	ambiguous	dominant	0.168123	0.155958
FBgn0075758	108	174	30	39	107.161	175.257	30.018	39.0234	0.00021116	0.509332	0.595003	ambiguous	under-dominant	0.378512	0.331175
FBgn0071345	16	32	14	18	15.8757	32.2311	14.0084	18.0108	0.0373392	0.704348	0.528508	ambiguous	dominant	0.36257	0.659061
FBgn0077615	407	470	144	168	403.839	473.394	144.087	168.101	0.0493638	0.373837	0.986518	ambiguous	under-dominant	0.222392	0.00687027
FBgn0075921	173	121	96	79	171.656	121.874	96.0577	79.0475	0.00712774	0.437085	0.633691	ambiguous	dominant	0.281182	0.212953
FBgn0080436	67	25	43	32	66.4796	25.1806	43.0258	32.0192	3.68142e-05	0.43868	0.118628	ambiguous	dominant	0.426265	0.974338
FBgn0075548	300	358	203	212	297.67	360.586	203.122	212.127	0.0374549	0.811442	0.42521	ambiguous	dominant	0.0625845	0.214043
FBgn0079729	98	190	65	100	97.2389	149.202	65.0391	78.0112	0.0029837	0.505694	0.392538	ambiguous	dominant	0.262374	0.355288
FBgn0079645	1276	1451	539	588	1266.09	1461.48	539.324	588.353	0.00118886	0.314964	0.618703	ambiguous	under-dominant	0.125531	0.081519
FBgn0263067	1297	950	783	681	1286.93	956.861	783.47	681.409	6.55848e-12	0.0537477	0.0717361	ambiguous	over-dominant	0.201358	0.226191
FBgn0071265	2460	2862	1527	1635	2440.89	2882.67	1527.92	1635.98	4.57556e-08	0.151709	0.093802	ambiguous	over-dominant	0.0985906	0.141406
FBgn0081847	337	432	213	221	334.383	435.12	213.128	221.133	0.00123083	0.83379	0.160579	ambiguous	dominant	0.0531929	0.326721
FBgn0071962	184	249	84	106	182.571	250.798	84.0505	106.064	0.00358957	0.278672	0.782282	ambiguous	dominant	0.335603	0.122468
FBgn0250268	149	76	56	33	147.843	76.5489	56.0336	33.0198	5.25458e-06	0.0744843	0.775643	ambiguous	dominant	0.762961	0.186649
FBgn0081957	1652	1438	813	718	1639.17	1448.39	813.488	718.431	0.000786098	0.0883732	0.996096	ambiguous	conserved-expression	0.179272	0.000752223
FBgn0074281	566	651	330	363	561.604	655.702	330.198	363.218	0.0223894	0.41399	0.707464	ambiguous	dominant	0.137504	0.0859827
FBgn0074149	69	42	20	14	68.4641	42.3033	20.012	14.0084	0.0236802	0.549177	0.865906	ambiguous	dominant	0.514573	0.180003
FBgn0078196	32	54	33	25	31.7515	54.39	33.0198	25.015	0.0320977	0.543363	0.0641466	ambiguous	dominant	0.400538	0.37598
FBgn0073679	166	216	118	124	164.711	217.56	118.071	124.075	0.0187696	0.838652	0.331703	ambiguous	dominant	0.0715533	0.329926
FBgn0073769	133	76	77	54	131.967	76.5489	77.0463	54.0324	0.000297099	0.165722	0.600567	ambiguous	dominant	0.511899	0.273825
FBgn0079137	147	187	96	123	145.858	188.351	96.0577	123.074	0.0469388	0.20268	0.982974	ambiguous	dominant	0.357552	0.0113008
FBgn0077558	260	347	166	164	257.981	349.506	166.1	164.099	0.000877523	0.986774	0.0744818	ambiguous	dominant	0.0174874	0.420567
FBgn0078079	4	22	2	1	3.96893	22.1589	2.0012	1.0006	0.000625961	0.76763	0.166958	ambiguous	dominant	1	1.48106
FBgn0076555	56	28	26	14	55.5651	28.2022	26.0156	14.0084	0.00572394	0.190376	0.939046	ambiguous	conserved-expression	0.893085	0.0852845
FBgn0071178	82	47	38	24	81.3631	47.3394	38.0228	24.0144	0.00558474	0.230625	0.890213	ambiguous	conserved-expression	0.662965	0.118367
FBgn0082058	687	813	345	342	681.664	818.872	345.207	342.205	0.00194111	0.995739	0.113104	ambiguous	dominant	0.0126	0.251976
FBgn0070691	45	10	13	3	44.6505	10.0722	13.0078	3.0018	4.61795e-06	0.0531434	0.988228	ambiguous	dominant	2.11548	0.0328171
FBgn0077675	515	425	254	247	511	428.069	254.153	247.148	0.0109907	0.904835	0.347987	ambiguous	dominant	0.0403175	0.215161
FBgn0079983	638	745	371	399	633.045	750.381	371.223	399.24	0.00652071	0.526328	0.473249	ambiguous	dominant	0.10497	0.140345
FBgn0074150	35	95	34	57	34.7282	95.6861	34.0204	57.0342	3.52037e-07	0.0722904	0.219489	ambiguous	dominant	0.745427	0.716776
FBgn0244448	140	229	95	112	138.913	230.654	95.0571	112.067	9.99354e-06	0.458568	0.144593	ambiguous	dominant	0.237499	0.494052
FBgn0077262	232	160	137	108	230.198	161.156	137.082	108.065	0.00103614	0.213981	0.658987	ambiguous	dominant	0.343145	0.171278
FBgn0248737	141	190	119	153	139.905	191.372	119.071	153.092	0.0132231	0.137296	0.835599	ambiguous	over-dominant	0.36257	0.0893649
FBgn0077797	368	489	211	236	365.142	492.532	211.127	236.142	8.08469e-05	0.450488	0.251357	ambiguous	dominant	0.161544	0.270216
FBgn0078760	90	51	41	37	89.301	51.3683	41.0246	37.0222	0.00295073	0.832209	0.260018	ambiguous	dominant	0.148099	0.649698
FBgn0071454	30	57	20	29	29.767	57.4117	20.012	29.0174	0.00777569	0.416866	0.631234	ambiguous	conserved-expression	0.536053	0.411577
FBgn0079180	277	442	172	209	274.849	445.192	172.103	209.126	2.37284e-09	0.178228	0.0844034	ambiguous	dominant	0.281094	0.414697
FBgn0249413	20	41	5	14	19.8447	41.2961	5.003	14.0084	0.0139558	0.133277	0.767826	ambiguous	dominant	1.48543	0.428172
FBgn0248616	571	709	327	327	566.565	714.121	327.196	327.196	0.000226983	0.995739	0.060176	ambiguous	dominant	0	0.333926
FBgn0072757	1215	1092	508	456	1205.56	1105.43	508.305	458.573	0.0450673	0.316638	0.909316	ambiguous	under-dominant	0.148543	0.0234419
FBgn0074289	5	24	6	13	4.96117	24.1733	6.0036	13.0078	0.000681422	0.27623	0.433296	ambiguous	dominant	1.11548	1.16919
FBgn0243600	60	9	20	10	59.534	10.5846	20.012	11.6833	4.41878e-09	0.339857	0.0662105	ambiguous	additive	0.776417	1.71533
FBgn0078756	1048	882	362	354	1039.86	888.37	362.217	354.213	0.000873819	0.915506	0.271987	ambiguous	under-dominant	0.0322403	0.194917
FBgn0078284	240	148	42	40	238.136	149.069	42.0252	40.024	1.56802e-05	0.930062	0.211114	ambiguous	under-dominant	0.0703893	0.605417
FBgn0071105	1080	957	297	299	1071.61	963.912	297.178	299.18	0.0221572	0.955537	0.41195	ambiguous	under-dominant	0.00968255	0.143127
FBgn0078885	424	520	230	270	420.707	523.756	230.138	270.162	0.00323035	0.208616	0.759676	ambiguous	dominant	0.231326	0.0847525
FBgn0263176	48	80	28	26	47.6272	80.5778	28.0168	26.0156	0.00946241	0.90877	0.175021	ambiguous	dominant	0.106915	0.651681
FBgn0075184	1511	1690	839	839	1499.26	1702.21	839.504	839.504	0.00211821	0.974529	0.10868	ambiguous	dominant	0	0.18315
FBgn0080404	116	189	84	89	115.099	190.365	84.0505	89.0535	7.51847e-05	0.843194	0.0728884	ambiguous	dominant	0.083416	0.642476
FBgn0247587	827	990	349	357	820.577	997.15	349.21	357.214	0.000235763	0.865141	0.145505	ambiguous	under-dominant	0.032697	0.248475
FBgn0073241	1287	1032	569	521	1277	1039.45	569.342	521.313	1.39733e-06	0.379947	0.250776	ambiguous	dominant	0.127145	0.169793
FBgn0244055	167	227	110	108	165.703	228.639	110.066	108.065	0.0049811	0.970698	0.129264	ambiguous	dominant	0.0264722	0.438003
FBgn0248803	37	66	21	20	36.7126	66.4767	21.0126	20.012	0.0087013	0.953873	0.209754	ambiguous	dominant	0.0703893	0.786182
FBgn0076152	33	13	18	9	32.7437	13.0939	18.0108	9.00541	0.00719992	0.240078	0.810101	ambiguous	conserved-expression	1	0.322324
FBgn0080612	609	446	304	286	604.27	449.221	304.183	286.172	4.04663e-06	0.719472	0.0771398	ambiguous	dominant	0.0880562	0.339712
FBgn0077203	348	449	219	229	345.297	452.243	219.132	229.138	0.000711879	0.796202	0.15506	ambiguous	dominant	0.0644167	0.324842
FBgn0078478	789	1040	437	510	782.872	1047.51	437.263	510.306	1.03286e-08	0.0727914	0.217021	ambiguous	dominant	0.222864	0.197253
FBgn0073529	261	134	91	69	258.973	134.968	91.0547	69.0415	1.23364e-09	0.247954	0.143201	ambiguous	dominant	0.39927	0.540916
FBgn0245398	281	347	151	150	278.818	349.506	151.091	150.09	0.014644	0.998184	0.230718	ambiguous	conserved-expression	0.00958605	0.31641
FBgn0076311	578	391	167	140	573.511	393.824	167.1	140.084	2.01029e-08	0.327211	0.284411	ambiguous	under-dominant	0.254421	0.287849
FBgn0078465	1	86	0	7	0.992233	86.6211	1	7.00421	1.99337e-24	0.104153	0.265787	ambiguous	dominant	2.80822	3.63967
FBgn0246583	776	561	362	314	769.973	565.052	362.217	314.189	4.81265e-08	0.224483	0.196376	ambiguous	additive	0.205225	0.2412
FBgn0077690	466	314	131	123	462.381	316.268	131.079	123.074	4.28401e-07	0.820077	0.0935269	ambiguous	under-dominant	0.0909085	0.457026
FBgn0076693	1067	1252	572	603	1058.71	1261.04	572.344	603.362	0.000204241	0.567773	0.215433	ambiguous	dominant	0.0761429	0.176162
FBgn0080321	4378	4969	1942	2042	4344	5004.89	1943.17	2043.23	7.46047e-10	0.24457	0.0589754	ambiguous	under-dominant	0.0724397	0.131875
FBgn0074422	17	55	6	7	16.868	55.3972	6.0036	7.00421	1.59557e-05	0.895316	0.238337	ambiguous	dominant	0.222392	1.49314
FBgn0080285	765	852	302	335	759.059	858.153	302.181	335.201	0.041606	0.387821	0.913552	ambiguous	under-dominant	0.149613	0.0274119
FBgn0080558	30	56	11	8	29.767	56.4044	11.0066	8.00481	0.0101469	0.722514	0.164412	ambiguous	dominant	0.459432	0.462663
FBgn0074425	85	150	69	98	84.3398	151.083	69.0415	98.0589	5.86809e-05	0.100146	0.456651	ambiguous	dominant	0.506185	0.334873
FBgn0078705	75	49	52	45	74.4175	49.3539	52.0312	45.027	0.0418486	0.718831	0.528508	ambiguous	dominant	0.208587	0.383891
FBgn0072988	106	71	31	25	105.177	71.5128	31.0186	25.015	0.0207055	0.66898	0.747846	ambiguous	dominant	0.31034	0.246202
FBgn0076833	56	28	20	20	55.5651	28.2022	20.012	20.012	0.00572394	0.998184	0.204562	ambiguous	conserved-expression	0	0.978369
FBgn0075365	508	396	231	232	504.055	398.86	231.139	232.139	0.000878745	0.972525	0.11312	ambiguous	conserved-expression	0.00623195	0.331465
FBgn0081352	102	140	72	94	101.208	141.011	72.0433	94.0565	0.0260127	0.239817	0.862634	ambiguous	dominant	0.384664	0.0938246
FBgn0078218	249	178	125	119	247.066	179.286	125.075	119.071	0.00208271	0.871385	0.221681	ambiguous	dominant	0.0709665	0.391671
FBgn0070859	129	173	82	91	127.998	174.249	82.0493	91.0547	0.0204511	0.706919	0.481129	ambiguous	dominant	0.150243	0.294789
FBgn0073112	146	266	93	130	144.866	267.921	93.0559	130.078	1.0651e-08	0.062186	0.237263	ambiguous	dominant	0.483209	0.40388
FBgn0081699	1152	1339	581	592	1143.05	1348.67	581.349	592.356	0.000288305	0.850284	0.115999	ambiguous	dominant	0.027059	0.211587
FBgn0078595	188	261	131	147	186.54	262.885	131.079	147.088	0.00123441	0.558619	0.293859	ambiguous	dominant	0.166249	0.328699
FBgn0081331	860	760	339	326	853.321	765.489	339.204	326.196	0.0383909	0.828645	0.640516	ambiguous	under-dominant	0.0564133	0.100293
FBgn0077937	600	728	383	412	595.34	733.258	383.23	412.248	0.000816345	0.516358	0.285687	ambiguous	dominant	0.1053	0.195307
FBgn0244453	134	69	84	62	132.959	69.4983	84.0505	62.0373	2.15224e-05	0.221283	0.270923	ambiguous	dominant	0.438121	0.497813
FBgn0076951	479	399	177	152	475.28	401.882	177.106	152.091	0.0204957	0.400366	0.949652	ambiguous	under-dominant	0.219678	0.0223281
FBgn0071686	1156	1305	588	671	1147.02	1314.43	588.353	671.403	0.00384314	0.0764673	0.975287	ambiguous	dominant	0.190497	0.00604252
FBgn0074432	72	139	52	59	71.4408	139.471	52.0312	58.8106	1.27385e-05	0.728211	0.0770509	ambiguous	dominant	0.176697	0.788443
FBgn0247218	253	371	162	205	251.035	373.679	162.097	205.123	6.19249e-06	0.0981883	0.406611	ambiguous	dominant	0.33963	0.234282
FBgn0076344	525	376	301	266	520.923	378.716	301.181	266.16	5.00863e-06	0.364969	0.181291	ambiguous	dominant	0.178337	0.281617
FBgn0081190	821	668	396	397	814.624	672.824	396.238	397.239	0.000410875	0.972525	0.090118	ambiguous	dominant	0.00363858	0.272265
FBgn0082036	30	87	24	33	29.767	87.6283	24.0144	33.0198	3.20146e-07	0.459258	0.0872008	ambiguous	additive	0.459432	1.09825
FBgn0074443	867	758	458	436	860.266	763.474	458.275	436.262	0.0223644	0.72749	0.594325	ambiguous	dominant	0.0710195	0.101184
FBgn0080679	213	152	77	52	211.346	153.098	77.0463	52.0312	0.00447736	0.119252	0.852761	ambiguous	dominant	0.566347	0.101195
FBgn0079467	141	199	89	115	139.905	200.437	89.0535	115.069	0.0034268	0.204188	0.735789	ambiguous	dominant	0.369757	0.148947
FBgn0263069	179	136	60	61	177.61	129.773	60.036	57.8242	0.0118137	0.938617	0.374434	ambiguous	dominant	0.0541558	0.398569
FBgn0081589	537	675	311	323	532.829	679.875	311.187	323.194	0.000150461	0.790825	0.110826	ambiguous	dominant	0.0546196	0.296977
FBgn0072663	879	1044	356	420	872.173	1051.54	356.214	420.252	0.000294065	0.0849509	0.891334	ambiguous	under-dominant	0.238512	0.0313053
FBgn0070908	46	70	37	43	45.6427	70.5056	37.0222	43.0258	0.0450096	0.717875	0.529404	ambiguous	dominant	0.216811	0.41054
FBgn0076908	1666	1503	920	937	1653.06	1513.86	920.553	937.563	0.0158281	0.809647	0.178946	ambiguous	over-dominant	0.0264152	0.100497
FBgn0079566	648	547	188	189	642.967	550.951	188.113	189.114	0.0118808	0.972525	0.34582	ambiguous	under-dominant	0.00765357	0.215169
FBgn0080420	94	37	38	21	93.2699	37.2672	38.0228	21.0126	2.33111e-06	0.11292	0.529577	ambiguous	dominant	0.85561	0.467895
FBgn0248668	184	228	69	70	182.571	229.647	69.0415	70.0421	0.0484518	0.966634	0.466668	ambiguous	under-dominant	0.0207586	0.3102
FBgn0245359	286	400	166	214	283.779	402.889	166.1	214.129	3.31263e-05	0.0632971	0.645599	ambiguous	dominant	0.366428	0.139188
FBgn0243547	436	564	274	318	432.614	568.073	274.165	318.191	0.000111348	0.201537	0.423654	ambiguous	dominant	0.214851	0.178147
FBgn0079454	706	618	301	323	700.517	622.463	301.181	323.194	0.0432985	0.593179	0.144673	ambiguous	conserved-expression	0.101771	0.0686599
FBgn0073929	55	28	16	17	54.5728	28.2022	16.0096	17.0102	0.00756298	0.934999	0.207262	ambiguous	dominant	0.0874628	0.864911
FBgn0081977	303	388	189	187	300.647	390.802	189.114	187.112	0.00238653	0.993131	0.104787	ambiguous	dominant	0.015348	0.363022
FBgn0247006	2	18	2	9	1.98447	18.13	2.0012	9.00541	0.000387841	0.115214	0.695236	ambiguous	dominant	2.16993	1.02163
FBgn0081346	62	105	27	25	61.5185	105.758	27.0162	25.015	0.00195268	0.905604	0.147762	ambiguous	dominant	0.111031	0.670649
FBgn0076077	1342	1626	697	734	1331.58	1637.74	697.419	734.441	3.32934e-07	0.530547	0.059753	ambiguous	dominant	0.0746214	0.223952
FBgn0081453	291	364	177	186	288.74	366.629	177.106	186.112	0.00788183	0.798655	0.310245	ambiguous	dominant	0.0715533	0.272997
FBgn0079830	342	259	171	167	339.344	260.871	171.103	167.1	0.00259552	0.93967	0.197773	ambiguous	dominant	0.0341482	0.345265
FBgn0263061	9225	10019	3394	3543	9153.35	10091.4	3396.04	3545.13	3.2034e-09	0.16838	0.143784	ambiguous	under-dominant	0.0619849	0.0787635
FBgn0079504	812	604	380	332	805.693	608.362	380.228	332.199	3.42847e-07	0.239069	0.257478	ambiguous	additive	0.194816	0.210484
FBgn0074972	514	649	297	344	510.008	653.687	297.178	344.207	0.00015519	0.186414	0.501339	ambiguous	dominant	0.211946	0.146135
FBgn0078816	124	68	48	27	123.037	68.4911	48.0288	27.0162	0.000197587	0.0759614	0.986518	ambiguous	dominant	0.830075	0.0150277
FBgn0248880	43	20	18	6	42.666	20.1444	18.0108	6.0036	0.00886742	0.0648654	0.695218	ambiguous	dominant	1.58496	0.502257
FBgn0073686	25	10	10	4	24.8058	10.0722	10.006	4.0024	0.0225794	0.281296	0.992134	ambiguous	conserved-expression	1.32193	0.0216307
FBgn0073797	310	378	184	191	307.592	380.73	184.111	191.115	0.0162164	0.844798	0.338677	ambiguous	dominant	0.0538669	0.253882
FBgn0249388	927	801	328	351	919.8	806.785	328.197	351.211	0.00939012	0.591242	0.0911608	ambiguous	under-dominant	0.0977752	0.0913612
FBgn0077463	106	74	30	38	105.177	74.5344	30.018	38.0228	0.0382235	0.562063	0.123924	ambiguous	dominant	0.341037	0.155799
FBgn0073617	538	668	246	243	533.822	672.824	246.148	243.146	0.000354669	0.976886	0.0789922	ambiguous	dominant	0.017702	0.316171
FBgn0075540	522	593	273	327	517.946	597.283	273.164	327.196	0.0480225	0.10358	0.836073	ambiguous	dominant	0.26039	0.0547767
FBgn0246832	25	45	10	13	24.8058	45.325	10.006	13.0078	0.0306551	0.741704	0.674405	ambiguous	dominant	0.378512	0.491116
FBgn0081683	275	332	166	145	272.864	334.398	166.1	145.087	0.0332985	0.48557	0.0574048	ambiguous	conserved-expression	0.19513	0.098252
FBgn0077497	28	62	17	28	27.7825	62.4478	17.0102	28.0168	0.000770635	0.265789	0.611252	ambiguous	conserved-expression	0.719892	0.44858
FBgn0079129	4	18	2	0	3.96893	18.13	2.0012	1	0.00469842	0.76763	0.226367	ambiguous	dominant	1.00087	1.19069
FBgn0246919	51	98	50	66	50.6039	98.7078	50.03	66.0397	0.000289543	0.324324	0.276053	ambiguous	dominant	0.400538	0.563377
FBgn0074267	1114	1214	638	694	1105.35	1222.77	638.383	694.417	0.0481393	0.283359	0.893871	ambiguous	dominant	0.121379	0.0242707
FBgn0244557	140	199	136	136	138.913	200.437	136.082	136.082	0.00284169	0.998184	0.0840134	ambiguous	over-dominant	0	0.528972
FBgn0081949	194	257	67	73	192.493	258.856	67.0403	73.0439	0.00585269	0.790242	0.472296	ambiguous	under-dominant	0.123735	0.303607
FBgn0082016	391	327	148	158	387.963	329.362	148.089	158.095	0.0428089	0.754048	0.22386	ambiguous	dominant	0.0943274	0.14192
FBgn0245855	30	5	8	3	29.767	6.08322	8.00481	3.62594	0.000117341	0.421898	0.517117	ambiguous	dominant	1.14251	1.14829
FBgn0077694	157	206	139	160	155.781	207.488	139.084	160.096	0.0181965	0.43868	0.550523	ambiguous	over-dominant	0.202987	0.210523
FBgn0079151	116	69	40	26	115.099	69.4983	40.024	26.0156	0.00173526	0.248072	0.89243	ambiguous	dominant	0.621488	0.106337
FBgn0247681	914	806	384	349	906.901	811.821	384.231	349.21	0.0290325	0.44879	0.927417	ambiguous	dominant	0.137879	0.0219043
FBgn0248148	4297	4674	1831	1981	4263.63	4707.76	1832.1	1982.19	5.88361e-05	0.0556719	0.761304	ambiguous	under-dominant	0.113597	0.0293616
FBgn0081384	216	264	143	143	214.322	265.907	143.086	143.086	0.0454061	0.998184	0.31045	ambiguous	dominant	0	0.311137
FBgn0249468	124	90	59	75	123.037	87.6081	59.0354	72.5268	0.025888	0.464505	0.0525026	ambiguous	dominant	0.296932	0.193024
FBgn0080660	91	46	49	35	90.2932	46.4472	49.0294	35.1079	0.000415518	0.328528	0.435149	ambiguous	dominant	0.481851	0.477175
FBgn0078933	84	38	50	44	83.3476	38.2744	50.03	44.0264	0.000104658	0.760151	0.0744818	ambiguous	dominant	0.184425	0.938335
FBgn0076576	2150	1908	907	818	2133.3	1921.78	907.545	818.491	0.00104655	0.150276	0.992134	ambiguous	under-dominant	0.149002	0.00164305
FBgn0081984	54	95	19	38	53.5806	95.6861	19.0114	38.0228	0.00176476	0.0568687	0.849466	ambiguous	dominant	1	0.163401
FBgn0074619	628	727	363	393	623.123	732.251	363.218	393.236	0.0112357	0.48557	0.565822	ambiguous	dominant	0.11456	0.118262
FBgn0250243	518	705	316	345	513.977	710.092	316.19	345.207	2.28737e-07	0.471847	0.0573327	ambiguous	dominant	0.126672	0.33963
FBgn0079806	332	236	156	113	329.421	237.704	156.094	113.068	0.000258815	0.0526149	0.989798	ambiguous	dominant	0.465223	0.0055424
XLOC_009696	43	18	16	7	42.666	18.13	16.0096	7.00421	0.00337444	0.192043	0.97801	ambiguous	dominant	1.19265	0.0420639
FBgn0080248	390	306	141	116	386.971	308.21	141.085	116.07	0.00504229	0.317972	0.90566	ambiguous	dominant	0.28157	0.0467414
FBgn0246666	152	216	102	137	150.819	217.56	102.061	137.082	0.00182399	0.0959411	0.811295	ambiguous	dominant	0.425607	0.102984
FBgn0086692	733	974	450	499	727.307	981.034	450.27	499.3	1.31647e-08	0.266854	0.059753	ambiguous	dominant	0.149115	0.282624
FBgn0078923	390	225	156	129	386.971	226.625	156.094	129.078	2.88225e-10	0.304042	0.064555	ambiguous	additive	0.274175	0.497743
FBgn0076140	93	133	44	44	92.2777	133.961	44.0264	44.0264	0.0148167	0.998184	0.296467	ambiguous	dominant	0	0.537754
FBgn0073294	262	349	113	114	259.965	351.521	113.068	114.068	0.000914058	0.972261	0.161293	ambiguous	dominant	0.0127111	0.42258
FBgn0070584	326	234	182	173	323.468	235.69	182.109	173.104	0.000440529	0.831553	0.14334	ambiguous	dominant	0.0731664	0.383566
FBgn0081531	224	140	81	60	222.26	141.011	81.0487	60.036	5.02708e-05	0.23706	0.633014	ambiguous	dominant	0.432959	0.223482
FBgn0077660	2418	2105	1237	1210	2399.22	2120.2	1237.74	1210.73	3.88382e-05	0.831477	0.125807	ambiguous	dominant	0.0318385	0.146525
FBgn0075488	267	214	183	182	264.926	215.546	183.11	182.109	0.0384833	0.998184	0.309583	ambiguous	over-dominant	0.0079052	0.289693
FBgn0076500	868	963	520	514	861.259	969.955	520.312	514.309	0.0357774	0.964936	0.224024	ambiguous	dominant	0.0167433	0.154728
FBgn0076617	388	291	161	139	384.987	293.102	161.097	139.084	0.000838739	0.449216	0.565135	ambiguous	dominant	0.211976	0.181431
FBgn0079533	263	418	175	214	260.957	421.019	175.105	214.129	8.81663e-09	0.157056	0.0994493	ambiguous	dominant	0.290256	0.399815
FBgn0077970	483	398	187	150	479.249	400.874	187.112	150.09	0.0132733	0.167881	0.859224	ambiguous	under-dominant	0.318076	0.0604517
FBgn0244073	956	829	337	294	948.575	834.987	337.202	294.177	0.0101468	0.268033	0.958719	ambiguous	under-dominant	0.196932	0.0129246
FBgn0077287	22	40	15	25	21.8291	40.2889	15.009	25.015	0.0395965	0.288377	0.89538	ambiguous	dominant	0.736966	0.147162
FBgn0076643	158	117	55	60	156.773	117.845	55.033	60.036	0.032025	0.809647	0.224912	ambiguous	dominant	0.125531	0.286254
FBgn0075510	538	450	275	252	533.822	453.25	275.165	252.151	0.0161024	0.585534	0.667834	ambiguous	dominant	0.126008	0.110043
FBgn0075566	218	268	142	165	216.307	269.936	142.085	165.099	0.0378925	0.393021	0.780057	ambiguous	dominant	0.216575	0.10296
FBgn0079569	815	946	420	433	808.67	952.832	420.252	433.26	0.00288743	0.800208	0.250684	ambiguous	dominant	0.0439777	0.192693
FBgn0245693	15	56	13	20	14.8835	56.4044	13.0078	20.012	2.1243e-06	0.447415	0.143784	ambiguous	additive	0.621488	1.30061
FBgn0070646	605	460	250	216	600.301	463.322	250.15	216.13	5.50422e-05	0.317233	0.508647	ambiguous	dominant	0.210897	0.162774
FBgn0247434	160	107	29	29	158.757	107.773	29.0174	29.0174	0.00365864	0.998184	0.354248	ambiguous	under-dominant	0	0.55883
FBgn0072376	192	116	142	118	190.509	116.838	142.085	118.071	6.59585e-05	0.350592	0.191646	ambiguous	over-dominant	0.267104	0.438247
FBgn0078251	61	134	55	70	60.5262	134.968	55.033	70.0421	4.85559e-07	0.386608	0.0659324	ambiguous	dominant	0.347923	0.809059
FBgn0078302	166	85	63	54	164.711	85.6139	63.0379	54.0324	1.58934e-06	0.656694	0.091975	ambiguous	dominant	0.222392	0.721625
FBgn0073410	21	7	4	2	20.8369	7.05056	4.0024	2.0012	0.0161135	0.651925	0.823804	ambiguous	dominant	1	0.563332
FBgn0071675	224	322	55	57	222.26	324.326	55.033	57.0342	6.73391e-05	0.925663	0.236031	ambiguous	under-dominant	0.0515303	0.493662
FBgn0249851	34	59	17	14	33.7359	59.4261	17.0102	14.0084	0.0182622	0.791586	0.179978	ambiguous	dominant	0.280108	0.536703
FBgn0249957	1700	1440	635	639	1686.8	1450.4	635.382	639.384	3.46296e-05	0.934355	0.0652007	ambiguous	under-dominant	0.00905934	0.208776
XLOC_013163	511	618	260	250	507.031	622.463	260.156	250.15	0.00258518	0.853101	0.07635	ambiguous	dominant	0.0565835	0.239331
FBgn0070492	19	64	7	16	18.8524	64.4622	7.00421	16.0096	1.60244e-06	0.186417	0.63885	ambiguous	dominant	1.19265	0.581058
FBgn0079824	511	657	296	345	507.031	661.745	296.178	345.207	4.22663e-05	0.164996	0.441433	ambiguous	dominant	0.220999	0.163202
FBgn0075065	42	88	37	40	41.6738	88.6356	37.0222	40.024	0.000135475	0.865095	0.0752808	ambiguous	dominant	0.112475	0.97627
FBgn0079020	112	177	30	31	111.13	178.278	30.018	31.0186	0.000319108	0.95254	0.269648	ambiguous	under-dominant	0.0473057	0.634576
FBgn0070865	167	215	125	131	165.703	216.553	125.075	131.079	0.0243619	0.842687	0.341191	ambiguous	dominant	0.0676387	0.318481
FBgn0243966	660	824	393	415	654.874	829.951	393.236	415.249	4.23177e-05	0.644212	0.113355	ambiguous	dominant	0.078582	0.263227
FBgn0078031	18	50	11	9	17.8602	50.3611	11.0066	9.00541	0.000229361	0.83095	0.0666318	ambiguous	dominant	0.289507	1.20606
FBgn0075965	7	42	6	12	6.94563	42.3033	6.0036	12.0072	6.4409e-07	0.356883	0.21658	ambiguous	dominant	1	1.60659
FBgn0079664	469	335	209	189	465.357	337.419	209.126	189.114	1.48166e-05	0.580956	0.186699	ambiguous	dominant	0.145117	0.318679
FBgn0081628	440	280	202	153	436.583	282.022	202.121	153.092	2.29167e-08	0.0561199	0.412149	ambiguous	additive	0.400824	0.229622
FBgn0081550	100	142	68	72	99.2233	143.026	68.0409	72.0433	0.0132609	0.86431	0.309634	ambiguous	dominant	0.0824622	0.445059
FBgn0080414	152	110	42	37	150.819	110.794	42.0252	37.0222	0.0234279	0.785587	0.66854	ambiguous	under-dominant	0.182864	0.262073
FBgn0071078	552	720	214	253	547.713	725.2	214.129	253.152	5.68458e-06	0.204305	0.493637	ambiguous	under-dominant	0.241527	0.163433
FBgn0078500	168	118	107	98	166.695	118.852	107.064	98.0589	0.00886899	0.760455	0.341999	ambiguous	dominant	0.126757	0.361287
FBgn0246574	12	26	8	4	11.9068	26.1878	8.00481	4.0024	0.0405658	0.482259	0.0952896	ambiguous	dominant	1	0.137108
FBgn0079059	889	1026	480	512	882.095	1033.41	480.288	512.308	0.00275076	0.518461	0.417605	ambiguous	dominant	0.0931094	0.135297
FBgn0072745	98	68	30	25	97.2389	68.4911	30.018	25.015	0.0433606	0.732931	0.755737	ambiguous	dominant	0.263034	0.242582
FBgn0080849	722	925	408	459	716.392	931.681	408.245	459.276	1.25519e-06	0.221283	0.209247	ambiguous	dominant	0.169925	0.20916
FBgn0247751	553	389	212	189	548.705	391.809	212.127	189.114	7.72171e-07	0.509167	0.169361	ambiguous	dominant	0.165678	0.320201
FBgn0079773	320	409	183	209	317.515	411.954	183.11	209.126	0.00192131	0.390436	0.507645	ambiguous	dominant	0.191659	0.184
FBgn0078094	568	392	173	157	563.589	394.831	173.104	157.094	1.28445e-07	0.642623	0.127038	ambiguous	under-dominant	0.140007	0.373399
FBgn0080595	18	4	6	0	17.8602	4.02889	6.0036	1	0.0051038	0.165722	0.892429	ambiguous	dominant	2.58583	0.437535
FBgn0075136	96	147	85	107	95.2544	148.062	85.0511	107.064	0.00232803	0.281988	0.475222	ambiguous	over-dominant	0.332076	0.304265
FBgn0250003	48	17	18	7	47.6272	17.1228	18.0108	7.00421	0.000319108	0.109666	0.938101	ambiguous	dominant	1.36257	0.113299
FBgn0247181	126	185	81	94	125.021	186.336	81.0487	94.0565	0.00179443	0.549946	0.363709	ambiguous	dominant	0.214739	0.360993
FBgn0075564	218	268	142	165	216.307	269.936	142.085	165.099	0.0378925	0.393021	0.780057	ambiguous	dominant	0.216575	0.10296
FBgn0247219	45	79	39	35	44.6505	79.5706	39.0234	35.021	0.00479008	0.828937	0.0737054	ambiguous	dominant	0.156119	0.677439
FBgn0078100	234	156	72	45	232.183	157.127	72.0433	45.027	0.000325099	0.0664459	0.838564	ambiguous	under-dominant	0.678072	0.11474
FBgn0246028	74	128	19	27	73.4253	128.924	19.0114	27.0162	0.000352917	0.466697	0.703278	ambiguous	under-dominant	0.50696	0.305217
FBgn0074458	252	315	151	179	250.043	317.275	151.091	179.108	0.0143621	0.296501	0.77972	ambiguous	dominant	0.245411	0.0981478
FBgn0081498	397	568	239	272	393.917	572.102	239.144	272.163	1.02733e-07	0.32439	0.0883018	ambiguous	dominant	0.186596	0.351787
FBgn0072707	360	280	175	170	357.204	282.022	175.105	170.102	0.00532323	0.920009	0.269648	ambiguous	dominant	0.0418202	0.299119
FBgn0249838	62	105	46	59	61.5185	105.758	46.0276	59.0354	0.00195268	0.421505	0.437179	ambiguous	dominant	0.359081	0.422599
FBgn0076434	111	60	79	60	110.138	60.4333	79.0475	60.036	0.000335958	0.294218	0.330897	ambiguous	dominant	0.39689	0.469004
XLOC_013743	37	20	12	4	36.7126	20.1444	12.0072	4.0024	0.0482907	0.153221	0.617825	ambiguous	dominant	1.58496	0.719068
FBgn0079090	231	308	147	184	229.206	310.224	147.088	184.111	0.00187084	0.143668	0.746144	ambiguous	dominant	0.32389	0.112779
FBgn0244487	301	244	86	68	298.662	245.762	86.0517	68.0409	0.0367922	0.362537	0.906489	ambiguous	under-dominant	0.338802	0.0575503
FBgn0245232	483	592	274	307	479.249	596.276	274.165	307.184	0.00164151	0.363289	0.50742	ambiguous	dominant	0.164063	0.151142
FBgn0249752	96	132	70	79	95.2544	132.953	70.0421	79.0475	0.0301956	0.679671	0.513319	ambiguous	dominant	0.174498	0.306565
FBgn0071575	45	82	30	45	44.6505	82.5922	30.018	45.027	0.00227005	0.233426	0.671843	ambiguous	dominant	0.584963	0.302367
FBgn0073821	310	407	203	237	307.592	409.939	203.122	237.142	0.000615445	0.263914	0.470624	ambiguous	dominant	0.223407	0.190984
FBgn0078009	1933	2338	1057	1164	1917.99	2354.89	1057.64	1164.7	8.79439e-10	0.082484	0.11493	ambiguous	dominant	0.139116	0.156948
FBgn0081030	657	558	243	210	651.897	562.03	243.146	210.126	0.0149077	0.327073	0.992134	ambiguous	under-dominant	0.210567	0.00343054
FBgn0245672	522	742	359	419	517.946	747.359	359.216	419.252	1.69815e-09	0.112709	0.073607	ambiguous	dominant	0.222966	0.306034
FBgn0076465	4442	4812	2428	2516	4407.5	4846.75	2429.46	2517.51	0.000100257	0.368955	0.22136	ambiguous	dominant	0.0513635	0.0856945
FBgn0246829	340	438	192	224	337.359	441.163	192.115	224.135	0.000901379	0.283518	0.548275	ambiguous	dominant	0.222392	0.164634
FBgn0243572	2654	2878	1456	1584	2633.39	2898.79	1456.87	1584.95	0.00284051	0.0722962	0.889012	ambiguous	dominant	0.121562	0.016967
FBgn0079509	337	417	274	272	334.383	420.012	274.165	272.163	0.00646591	0.998184	0.11168	ambiguous	over-dominant	0.0105692	0.31836
FBgn0012736	782	1086	308	355	775.926	1093.84	308.185	355.213	5.20741e-12	0.195003	0.0881494	ambiguous	under-dominant	0.204889	0.290526
FBgn0247841	11	42	1	4	10.9146	42.3033	1.0006	4.0024	3.86595e-05	0.375137	0.988945	ambiguous	dominant	2	0.0454835
FBgn0075915	1085	895	642	589	1076.57	901.464	642.386	589.354	0.000135836	0.358149	0.38886	ambiguous	over-dominant	0.124306	0.131799
FBgn0081996	141	94	89	96	139.905	94.6789	89.0535	96.0577	0.00629345	0.785313	0.066492	ambiguous	over-dominant	0.109229	0.454103
FBgn0070775	692	866	366	435	686.625	872.254	366.22	435.261	2.16419e-05	0.0640699	0.636686	ambiguous	dominant	0.249172	0.096054
FBgn0249064	1476	1223	530	463	1464.54	1231.83	530.318	463.278	1.16289e-05	0.148959	0.768261	ambiguous	under-dominant	0.19498	0.0546574
FBgn0076441	3380	2382	2148	1569	3353.75	2399.2	2149.29	1569.94	1.15274e-36	9.40634e-19	0.779587	cis	over-dominant	0.453149	0.0300705
FBgn0071063	233	332	101	165	231.19	334.398	101.061	165.099	7.57164e-05	0.000967026	0.617145	cis	dominant	0.708111	0.175627
FBgn0245275	136	96	61	27	134.944	96.6933	61.0366	27.0162	0.0214352	0.00302748	0.174362	cis	dominant	1.17585	0.69498
FBgn0012709	155	222	67	120	153.796	223.603	67.0403	120.072	0.00123157	0.00114504	0.449174	cis	conserved-expression	0.840801	0.300879
FBgn0078606	140	306	64	112	138.913	308.21	64.0385	112.067	1.07352e-14	0.00284749	0.38597	cis	dominant	0.807355	0.342381
FBgn0246063	194	413	96	220	192.493	415.983	96.0577	220.132	1.60112e-18	7.99007e-11	0.827808	cis	additive	1.1964	0.0846814
FBgn0245772	359	458	121	176	356.212	461.308	121.073	176.106	0.00106815	0.0104247	0.592591	cis	under-dominant	0.540568	0.167574
FBgn0074800	2322	809	709	281	2303.97	814.843	709.426	281.169	3.59645e-163	1.90072e-40	0.328742	cis	additive	1.33522	0.16431
FBgn0248450	347	433	114	191	344.305	436.127	114.068	191.115	0.00384032	0.000146908	0.124473	cis	dominant	0.744539	0.403477
FBgn0245003	470	642	191	252	466.35	646.637	191.115	252.151	6.41414e-07	0.022775	0.804539	cis	dominant	0.399851	0.0716922
FBgn0070840	17	36	6	21	16.868	36.26	6.0036	21.0126	0.0172422	0.0210038	0.564651	cis	conserved-expression	1.80735	0.703262
FBgn0077857	360	534	150	267	357.204	537.857	150.09	267.16	1.73419e-08	2.33768e-07	0.339055	cis	dominant	0.831877	0.241404
FBgn0071179	837	1080	332	473	830.499	1087.8	332.199	473.284	6.46924e-08	1.14439e-05	0.519502	cis	dominant	0.510657	0.121294
FBgn0074505	290	360	142	192	287.748	362.6	142.085	192.115	0.0106969	0.0345961	0.764131	cis	conserved-expression	0.435215	0.101641
FBgn0246808	1221	1421	645	758	1211.52	1431.26	645.388	758.455	0.000160225	0.0152902	0.966353	cis	dominant	0.232899	0.00757539
FBgn0074637	25	58	5	24	24.8058	58.4189	5.003	24.0144	0.000661313	0.0026582	0.342024	cis	dominant	2.26303	1.02728
FBgn0073713	2	58	2	18	1.98447	58.4189	2.0012	18.0108	5.32606e-15	0.00156321	0.457144	cis	additive	3.16993	1.70969
FBgn0078893	2982	3456	1263	1431	2958.84	3480.96	1263.76	1431.86	3.79398e-09	0.00743206	0.605717	cis	under-dominant	0.180169	0.0542847
FBgn0244051	26	4	18	4	25.7981	4.02889	18.0108	4.0024	8.46403e-05	0.0155796	0.794449	cis	dominant	2.16993	0.508884
FBgn0246938	41	18	37	5	40.6816	18.13	37.0222	5.003	0.00654152	4.68503e-06	0.0746191	cis	dominant	2.88753	1.72153
FBgn0080093	274	535	135	233	271.872	538.864	135.081	233.14	1.20331e-19	6.14391e-06	0.488528	cis	additive	0.787371	0.199623
FBgn0078927	61	106	35	68	60.5262	106.766	35.021	68.0409	0.00114876	0.00857845	0.839049	cis	dominant	0.95818	0.139366
FBgn0080412	221	288	80	155	219.284	290.08	80.0481	155.093	0.00572386	1.61496e-05	0.0684292	cis	dominant	0.954196	0.550543
FBgn0070771	166	229	52	86	164.711	230.654	52.0312	86.0517	0.00312415	0.023525	0.604761	cis	dominant	0.725825	0.24003
XLOC_010551	277	125	108	55	274.849	125.903	108.065	55.033	2.65261e-13	0.000496674	0.756054	cis	dominant	0.973528	0.152799
FBgn0074933	9	41	3	16	8.9301	41.2961	3.0018	16.0096	9.70206e-06	0.0139982	0.916304	cis	dominant	2.41504	0.20578
XLOC_006828	8	24	0	16	7.93787	24.1733	1	16.0096	0.00871255	0.000878092	0.204874	cis	conserved-expression	4.00087	2.39427
FBgn0071833	245	160	182	85	243.097	161.156	182.109	85.0511	0.000109444	9.94303e-08	0.104958	cis	dominant	1.0984	0.505325
FBgn0243981	617	362	225	162	612.208	364.614	225.135	162.097	6.53105e-15	0.0128639	0.269972	cis	dominant	0.473931	0.273719
FBgn0243664	108	31	70	18	107.161	34.0521	70.0421	19.6422	1.46896e-09	1.52393e-06	0.830687	cis	dominant	1.83426	0.180298
FBgn0074449	181	278	126	172	179.594	280.008	126.076	172.103	1.60413e-05	0.0405806	0.577686	cis	dominant	0.448985	0.191741
FBgn0012694	45	88	20	42	44.6505	88.6356	20.012	42.0252	0.000460505	0.030212	0.927417	cis	conserved-expression	1.07039	0.0811801
FBgn0073877	300	243	133	81	297.67	244.755	133.08	81.0487	0.0364087	0.0043206	0.17629	cis	dominant	0.715432	0.433057
FBgn0077839	507	624	211	303	503.062	628.507	211.127	303.182	0.000953145	0.000578903	0.371114	cis	dominant	0.522075	0.200884
FBgn0080899	2585	2126	1058	930	2564.92	2141.35	1058.64	930.559	7.95132e-10	0.0352039	0.532878	cis	under-dominant	0.186037	0.074355
FBgn0081895	268	588	158	284	265.919	592.247	158.095	284.171	1.33028e-27	5.1335e-08	0.207262	cis	additive	0.845966	0.309248
FBgn0247979	630	325	235	129	625.107	326.904	235.141	128.903	9.33829e-22	8.72654e-07	0.84011	cis	dominant	0.867243	0.0679917
FBgn0081322	32	4	20	0	31.7515	4.02889	20.012	1	3.17669e-06	9.14452e-05	0.584403	cis	dominant	4.32279	1.34443
FBgn0077933	1307	1441	672	820	1296.85	1451.41	672.404	820.493	0.0139355	0.00119546	0.350567	cis	dominant	0.287163	0.124721
FBgn0081967	789	613	453	335	782.872	617.427	453.272	335.201	1.96581e-05	0.000519191	0.662285	cis	dominant	0.43535	0.0928425
FBgn0072135	18	48	8	22	17.8602	48.3467	8.00481	22.0132	0.000484787	0.0497816	0.988181	cis	conserved-expression	1.45943	0.0227634
FBgn0080634	94	64	48	24	93.2699	64.4622	48.0288	24.0144	0.037761	0.0304369	0.466338	cis	conserved-expression	1	0.467042
FBgn0080137	195	121	125	68	193.486	121.874	125.075	68.0409	0.000133495	0.000609491	0.630819	cis	dominant	0.878321	0.211485
FBgn0076241	139	91	95	57	137.92	91.6572	95.0571	57.0342	0.00461204	0.0165434	0.785692	cis	dominant	0.736966	0.14745
FBgn0071321	210	129	108	57	208.369	129.932	108.065	57.0342	5.02061e-05	0.000984003	0.592767	cis	conserved-expression	0.921997	0.24061
FBgn0070795	124	66	46	20	123.037	66.4767	46.0276	20.012	9.87558e-05	0.0108101	0.664653	cis	dominant	1.20163	0.313462
FBgn0081591	933	802	512	417	925.754	807.792	512.308	417.251	0.00674118	0.0173832	0.592767	cis	dominant	0.296096	0.0994523
FBgn0078257	1863	671	973	338	1848.53	675.846	973.585	338.203	7.27053e-125	3.78247e-68	0.689397	cis	additive	1.52542	0.0738043
FBgn0247054	504	421	287	196	500.086	424.041	287.172	196.118	0.0191631	0.000609491	0.153373	cis	conserved-expression	0.550197	0.312224
FBgn0080577	352	178	130	85	349.266	179.286	130.078	85.0511	4.11672e-13	0.0175144	0.308974	cis	dominant	0.612977	0.349091
FBgn0070939	129	74	56	26	127.998	74.5344	56.0336	26.0156	0.000405595	0.00790971	0.605409	cis	dominant	1.10692	0.326772
FBgn0071341	11798	9707	5850	4981	11706.4	9777.11	5853.51	4983.99	1.60725e-41	4.38339e-14	0.607483	cis	additive	0.232001	0.027813
[truncated: 5,632 more rows]
